# Supplementary material for: Immune signatures of protective spleen memory CD8 T cells
Source: PubMed Central journal article supplement (PMC5121635; doi:10.1038/srep37651), 2016-11-24
Supplement: srep37651-s1.pdf [file srep37651-s1.pdf]

## **Immune signatures of protective spleen memory CD8 T cells**

Lilia Brinza, Sophia Djebali, Martine Tomkowiak, Julien Mafille, Céline Loiseau, Pierre-Emmanuel Jouve, Simon de Bernard, Laurent Buffat, Bruno Lina, Michèle Ottmann, Manuel Rosa-Calatrava, Stéphane Schicklin, Nathalie Bonnefoy, Grégoire Luvau, Morgan Grau, Mélanie Wencker, Christophe Arpin, Thierry Walzer, Yann Leverrier and Jacqueline Marvel

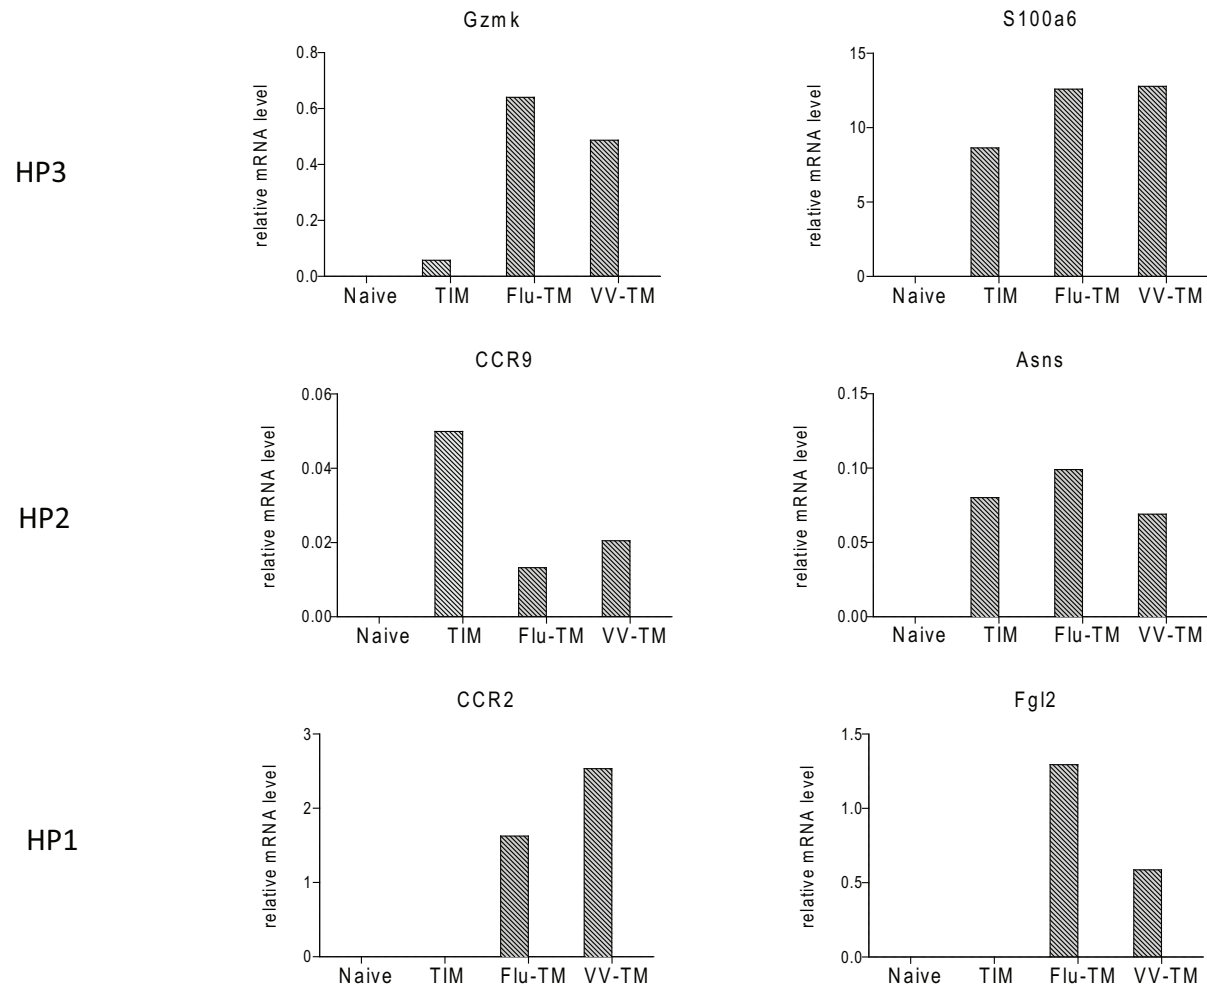

**Supplementary Fig. S1.** Validation of transcriptomic signature by quantitative RT-PCR assay. mRNA of Naive, TIM or Flu-TM CD8 T cells were analyzed *ex vivo* (homeostatic condition - dashed bar). The expression of each selected gene was measured in triplicate with TLDA technology. Data show one out of 2 independent experiments.

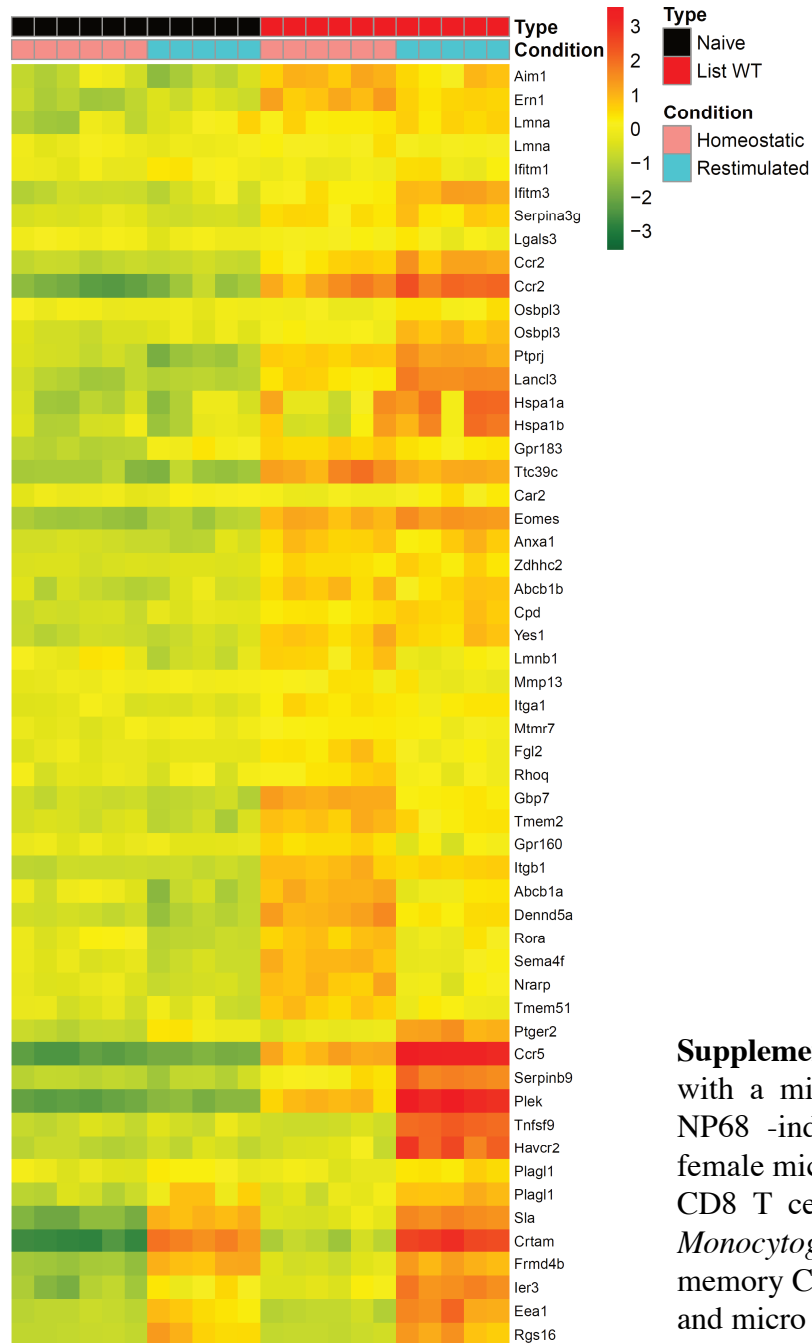

**Supplementary Fig. S2.** Expression heatmap of the top 55 HP1 genes with a minimal FC of 4 when comparing *Listeria Monocytogenes*-NP68 -induced memory cells (List WT) to naive cells. C57BL/6J female mice (8-12 weeks old) that had received  $2 \times 10^5$  naive F5xLy5.1 CD8 T cells one day before were infected *i.v.* with  $3 \times 10^3$  *Listeria Monocytogenes* strain 10403S expressing NP68 epitope. Specific memory CD8 T cells were purified at least 6 weeks after immunization and micro arrays data were generated as described in the methods

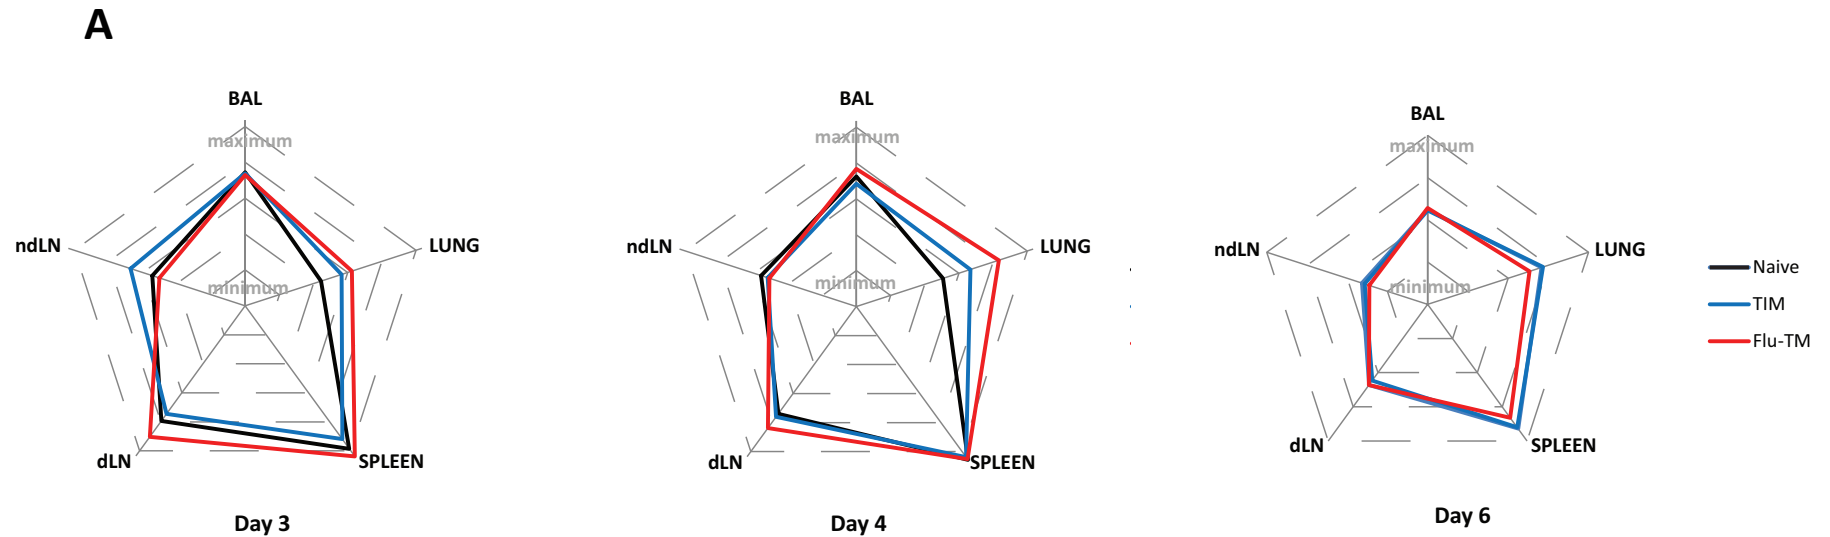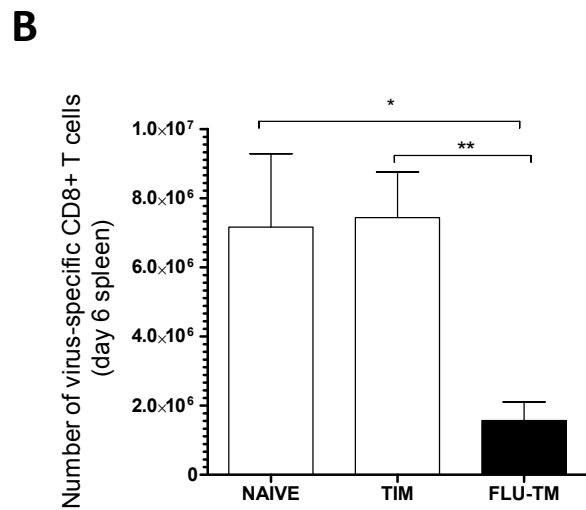

**Supplementary Fig. S3.** Flu-TM localize more rapidly to the draining lymph node and the infected lung. A total of  $5 \times 10^4$  naive, TIM or Flu-TM (CD45.1+) CD8 T cells were transferred i.v. into C57BL/6J mice that were infected i.n. 24 h later with  $2 \times 10^5$  TCID<sub>50</sub> Flu-NP68. (A) Mice were sacrificed at day 3, 4, 6 and the number of F5 CD8 T cells present in the BAL, lung, spleen, draining (mediastinal) and non-draining (inguinal) lymph nodes was determined. Data show one out of 6 independent experiments with similar results. (B) Mice were sacrificed at day 6 and the number of virus specific F5 CD8 T cells present in the spleen was determined. Data show mean of 4 independent experiments. \*p < 0.05 and \*\* p < 0.01 (two tailed unpaired t-test)

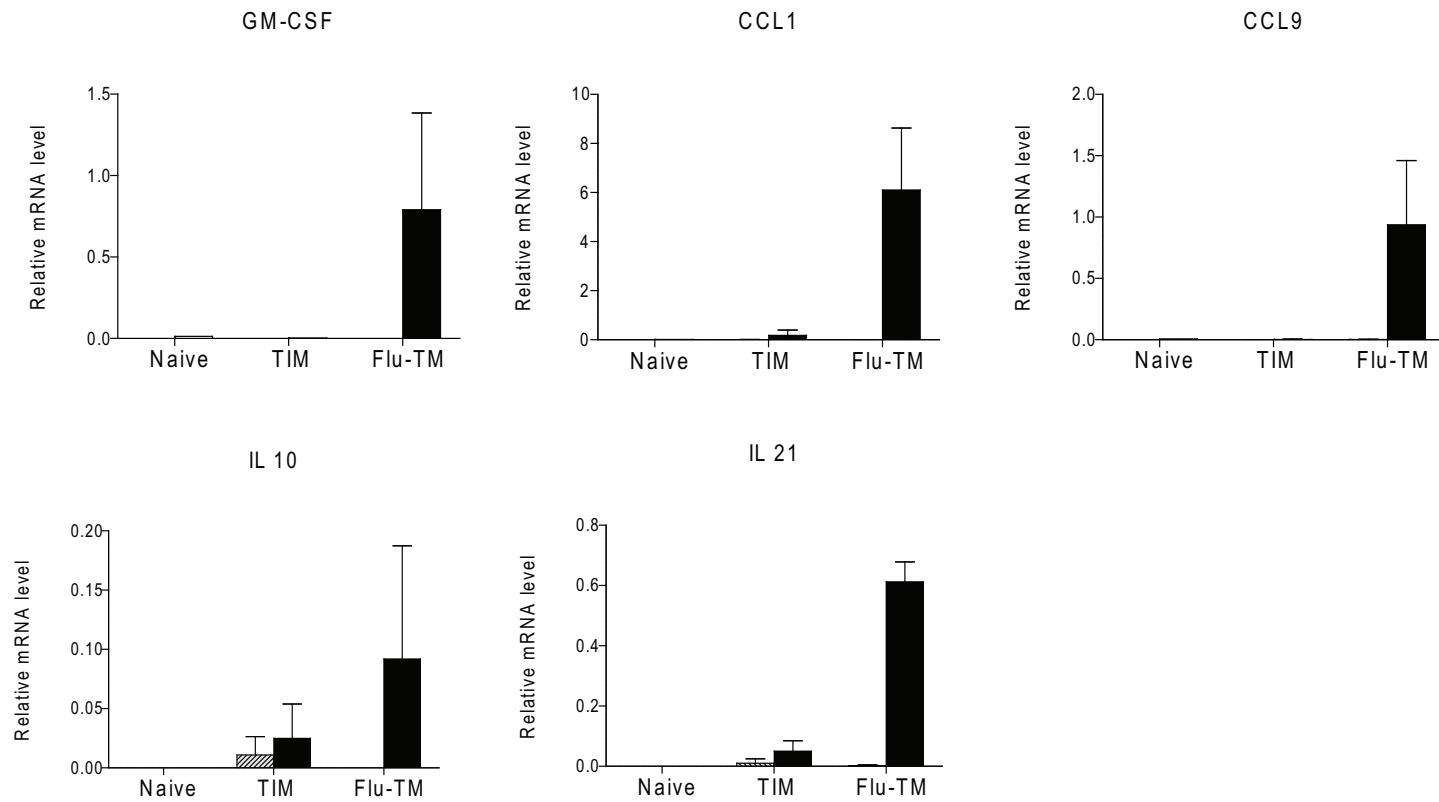

**Supplementary Fig. S4.** Validation of transcriptomic signature by quantitative RT-PCR assay. mRNA of Naive, TIM or Flu-TM CD8 T cells were analyzed *ex vivo* (dashed bar) or after 2h of NP68 peptide stimulation (black bar). The expression of each selected gene was measured in triplicate. Data show mean of 2 independent experiments.

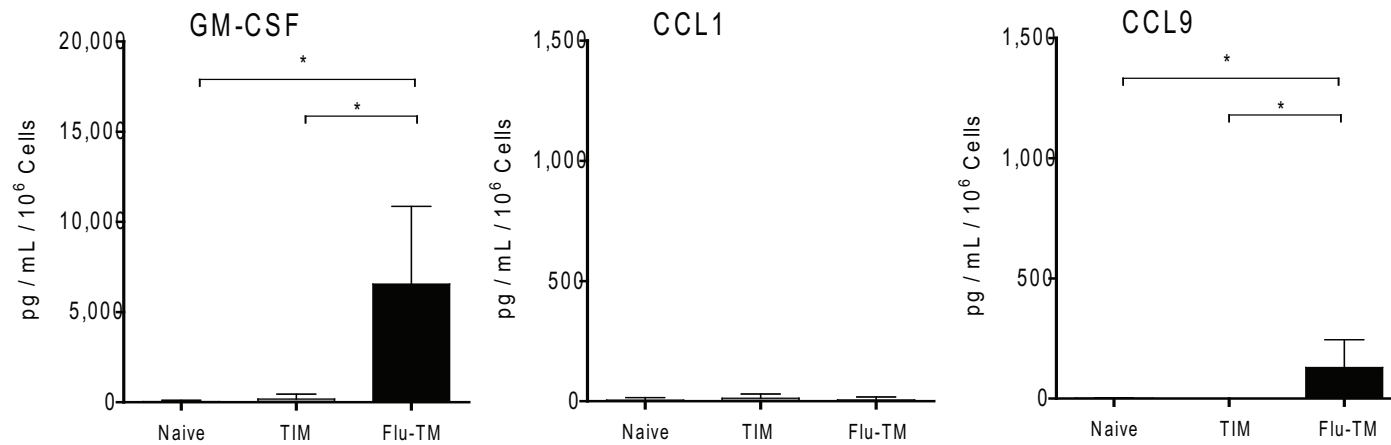

**Supplementary Fig. S5.** IL-12 and IL-18 induce the production of GM-CSF by Flu-TM memory cells. Cytokine profiles of naive, TIM and Flu-memory CD8 T cells. Supernatants were collected 48h after IL-12/IL-18 stimulation. Cytokine production was measured by bead-based multiplexing technology for GM-CSF or by ELISA for CCL1, CCL9. Data are mean  $\pm$  SD of 3 independent experiments with a pool of four or five mice per group. \* $p < 0.05$  (two tailed unpaired t-test).

**SUPPLEMENTARY TABLE S1.** Number of differentially expressed probe sets and genes. The FDR adjusted p-values have been used to select the differentially expressed genes/probe sets (adjusted p-value  $\leq 0.05$ ) for each comparison (see Methods for further information). A: Number of differentially expressed probe sets in the lists. B: Number of differentially expressed probe sets after FluH correction (see methods). C: Number of differentially expressed probe sets corresponding to a gene, D. Number of unique genes in the lists.

| <b>List name</b> | <b>A</b> | <b>B</b> | <b>C</b> | <b>D</b> |
|------------------|----------|----------|----------|----------|
| TIMH - NaH       | 1823     | 1823     | 1618     | 1174     |
| FluH - NaH       | 4690     | 4574     | 4028     | 2821     |
| FluH - TIMH      | 2399     | 2302     | 2073     | 1526     |
| TIMR - NaR       | 1532     | 1532     | 1370     | 985      |
| FluR - NaR       | 4451     | 4451     | 3999     | 2847     |
| FluR - TIMR      | 1265     | 1265     | 1148     | 819      |
| NaR - NaH        | 11789    | 11789    | 10485    | 6636     |
| TIMR - TIMH      | 9408     | 9408     | 8386     | 5383     |
| FluR - FluH      | 8533     | 8223     | 7392     | 4921     |

**SUPPLEMENTARY TABLE S2.** Analysis of discretized fold change profiles - summary. For each differentially expressed probe set, in at least one comparison a discretized fold change was defined for three comparisons (TIM – Na, Flu – Na, Flu – TIM), in homeostatic (H) and re- stimulated (R) conditions. Each FC was discretized as follows: 1 if  $\log_2 FC > 0$  and the adjusted p- value  $< 0.05$ , -1 if  $\log_2 FC < 0$  and the adjusted p-value  $< 0.05$  or 0 otherwise. Probe sets with a compatible order relation were selected (P1 to P6). (a) Probe set number belonging to this profile, (b) corresponding gene number belonging to this profile, (c) supplementary table number containing full gene list.

| Tim/Na | Flu/Na | Flu/Tim | Order relation | Profile | Homeostatic |     |          | Restimulation |     |          |
|--------|--------|---------|----------------|---------|-------------|-----|----------|---------------|-----|----------|
|        |        |         |                |         | (a)         | (b) | (c)      | (a)           | (b) | (c)      |
| 0      | 1      | 1       | Na=Tim<Flu     | P1      | 305         | 234 | 3 - up   | 232           | 184 | 6 - up   |
| 0      | -1     | -1      | Flu<Na=Tim     | P1m     | 70          | 42  | 3 - down | 38            | 29  | 6 - down |
| 1      | 1      | 0       | Na<Tim=Flu     | P2      | 119         | 96  | 4 - up   | 221           | 167 | 7 - up   |
| -1     | -1     | 0       | Tim=Flu<Na     | P2m     | 146         | 104 | 4 - down | 133           | 94  | 7 - down |
| 1      | 1      | 1       | Na<Tim<Flu     | P3      | 202         | 157 | 5 - up   | 203           | 141 | 8 - up   |
| -1     | -1     | -1      | Flu<Tim<Na     | P3m     | 64          | 43  | 5 - down | 37            | 27  | 8 - down |
| 1      | 0      | -1      | Na=Flu<Tim     | P4      | 4           | 3   | NS       | 2             | 2   | NS       |
| -1     | 0      | 1       | Tim<Na=Flu     | P4m     | 2           | 2   | NS       | 4             | 2   | NS       |
| -1     | 1      | 1       | Tim<Na<Flu     | P5      | 4           | 2   | NS       | 1             | 1   | NS       |
| 1      | 1      | -1      | Na<Flu<Tim     | P6      | 1           | 1   | NS       | 3             | 2   | NS       |
| -1     | -1     | 1       | Tim<Flu<Na     | P6m     | 2           | 2   | NS       | 2             | 2   | NS       |



**SUPPLEMENTARY TABLE S3.** Genes with a fold change of at least 2 in the FLU-TM to Naive comparison and belonging to one of the six following profiles HP1 are shown. FC for the TIM to naive comparison are given. If the gene was found in the meta-analysis (tables S9, 10 and 11) its rank is given. For certain genes multiple probe sets are present on the Affymetrix microarrays, the profile for each probe set is given.

HP1- Upregulated genes

| Gene          | FluH-NaH | TimH-NaH | RankMeta | Classe profils             |
|---------------|----------|----------|----------|----------------------------|
| Plek          | 5.1      | 0        | 6        | p3, p1, p1                 |
| Fgl2          | 4.7      | 0        | 121      | p1                         |
| Ifitm1        | 3.6      | 0        | 382      | p1                         |
| Rgs16         | 3.5      | 0        | 0        | p1                         |
| 6230424C14Rik | 3.5      | 0        | 0        | p1                         |
| Hspa1a        | 3.5      | 0        | 230      | p1                         |
| Gpr15         | 3.2      | 0        | 368      | p1                         |
| Pdcd1         | 3.2      | 0        | 516      | p1                         |
| Ccr5          | 3.2      | 0        | 7        | p3, p1, p1                 |
| Hspa1b        | 3.1      | 0        | 0        | p1                         |
| Yes1          | 3.1      | 0        | 60       | p1                         |
| Ttc39c        | 3.1      | 0        | 30       | p0, p1, p1                 |
| Anxa1         | 3        | 0        | 26       | p1                         |
| Osbpl3        | 3        | 0        | 48       | p1                         |
| Itga1         | 3        | 0        | 62       | p1                         |
| Il2           | 2.9      | 0        | 0        | p1                         |
| Lgals3        | 2.8      | 0        | 243      | p1                         |
| Eomes         | 2.8      | 0        | 42       | p3, p1                     |
| Ifitm3        | 2.7      | 0        | 275      | p1                         |
| Ptger2        | 2.7      | 0        | 389      | p1                         |
| Serpina3g     | 2.6      | 0        | 0        | p1                         |
| Crtam         | 2.6      | 0        | 87       | p1                         |
| AA467197      | 2.6      | 0        | 123      | p1                         |
| Serpinb9      | 2.5      | 0        | 114      | p1                         |
| Ier3          | 2.5      | 0        | 129      | p1                         |
| Itgb1         | 2.5      | 0        | 34       | p3, p3, p1                 |
| Cpd           | 2.5      | 0        | 186      | p3, p3, p3, p0, p1, p1, p1 |
| Gpr160        | 2.4      | 0        | 165      | p1                         |
| Abcb1b        | 2.4      | 0        | 354      | p1                         |
| Lmnb1         | 2.4      | 0        | 433      | p1                         |
| Lancl3        | 2.3      | 0        | 122      | p1                         |
| Gbp7          | 2.3      | 0        | 260      | p1                         |
| Tmem2         | 2.3      | 0        | 141      | p3, p1, p1                 |
| Frm4b         | 2.3      | 0        | 333      | p3, p1, p1                 |
| Plagl1        | 2.3      | 0        | 562      | p1, p0                     |
| 2610027H17Rik | 2.2      | 0        | 0        | p1                         |
| Car2          | 2.2      | 0        | 0        | p1                         |
| Ahr           | 2.2      | 0        | 0        | p1                         |
| Tnfrsf9       | 2.2      | 0        | 0        | p1                         |
| Ccr2          | 2.2      | 0        | 22       | p1                         |
| Ptprj         | 2.2      | 0        | 44       | p1                         |
| Dennd5a       | 2.2      | 0        | 95       | p1                         |
| Rora          | 2.2      | 0        | 103      | p1                         |
| Gpr183        | 2.2      | 0        | 111      | p1                         |
| Mttr7         | 2.2      | 0        | 306      | p1                         |
| Lmna          | 2.2      | 0        | 307      | p1                         |
| Abcb1a        | 2.2      | 0        | 139      | p3, p1                     |
| Smox          | 2.1      | 0        | 0        | p1                         |
| Tmem51        | 2.1      | 0        | 220      | p1                         |
| Eea1          | 2.1      | 0        | 286      | p1                         |
| Sema4f        | 2.1      | 0        | 292      | p1                         |
| Mmp13         | 2        | 0        | 0        | p1                         |
| Zdhhc2        | 2        | 0        | 55       | p1                         |
| Nrarp         | 2        | 0        | 84       | p1                         |
| Ern1          | 2        | 0        | 130      | p1                         |
| Aim1          | 2        | 0        | 134      | p1                         |
| Sla           | 2        | 0        | 268      | p1                         |
| Rhoq          | 2        | 0        | 364      | p1                         |
| Havcr2        | 2        | 0        | 514      | p1                         |

|               |     |   |     |                    |
|---------------|-----|---|-----|--------------------|
| Itpril2       | 1.9 | 0 | 106 | p1                 |
| Vim           | 1.9 | 0 | 193 | p1                 |
| Rnf157        | 1.9 | 0 | 246 | p1                 |
| Reck          | 1.9 | 0 | 341 | p1                 |
| Ret           | 1.9 | 0 | 416 | p1                 |
| Dusp4         | 1.8 | 0 | 0   | p1                 |
| Sytl2         | 1.8 | 0 | 81  | p1                 |
| Il10ra        | 1.8 | 0 | 98  | p1                 |
| Baiap3        | 1.8 | 0 | 156 | p1                 |
| Cish          | 1.8 | 0 | 159 | p1                 |
| Emp1          | 1.8 | 0 | 214 | p1                 |
| Dtx4          | 1.8 | 0 | 235 | p1                 |
| Mettl21d      | 1.8 | 0 | 439 | p1                 |
| Alcam         | 1.8 | 0 | 161 | p3, p1, p1, p1, p1 |
| 3110043O21Rik | 1.7 | 0 | 0   | p1                 |
| Smpdl3b       | 1.7 | 0 | 46  | p1                 |
| 5830416P10Rik | 1.7 | 0 | 97  | p1                 |
| Slc25a24      | 1.7 | 0 | 102 | p1                 |
| Socs2         | 1.7 | 0 | 323 | p1                 |
| Cxcr4         | 1.7 | 0 | 415 | p1                 |
| Itgav         | 1.7 | 0 | 0   | p1, p1, p0         |
| Car5b         | 1.7 | 0 | 67  | p3, p1             |
| BC016495      | 1.7 | 0 | 278 | p0, p3, p1         |
| 2310031A07Rik | 1.6 | 0 | 0   | p1                 |
| Sv2c          | 1.6 | 0 | 0   | p1                 |
| Fcgr2b        | 1.6 | 0 | 41  | p1                 |
| 1700025G04Rik | 1.6 | 0 | 66  | p1                 |
| Sytl3         | 1.6 | 0 | 177 | p1                 |
| Cldnd1        | 1.6 | 0 | 184 | p1                 |
| Cd80          | 1.6 | 0 | 370 | p1                 |
| Ifitm2        | 1.6 | 0 | 702 | p1                 |
| Vps54         | 1.6 | 0 | 427 | p3, p1, p0, p1     |
| Fosl2         | 1.5 | 0 | 0   | p1                 |
| A930041H05Rik | 1.5 | 0 | 0   | p1                 |
| Vmn2r84       | 1.5 | 0 | 0   | p1                 |
| B4galnt4      | 1.5 | 0 | 0   | p1                 |
| Raph1         | 1.5 | 0 | 148 | p1                 |
| Map3k8        | 1.5 | 0 | 229 | p1                 |
| Tmbim1        | 1.5 | 0 | 239 | p1                 |
| Gprin3        | 1.5 | 0 | 272 | p1                 |
| Rab19         | 1.5 | 0 | 317 | p1                 |
| Rbpj          | 1.5 | 0 | 474 | p1                 |
| Nek6          | 1.5 | 0 | 511 | p1                 |
| Slc3a2        | 1.5 | 0 | 563 | p1                 |
| Zeb2          | 1.5 | 0 | 53  | p0, p1, p1, p0     |
| Endod1        | 1.5 | 0 | 71  | p3, p3, p3, p1     |
| Nfatc2        | 1.5 | 0 | 173 | p3, p1             |
| Casp3         | 1.5 | 0 | 273 | p3, p1             |
| Adam9         | 1.4 | 0 | 0   | p1                 |
| Esm1          | 1.4 | 0 | 0   | p1                 |
| Gzmm          | 1.4 | 0 | 63  | p1                 |
| Entpd1        | 1.4 | 0 | 70  | p1                 |
| Adam8         | 1.4 | 0 | 305 | p1                 |
| Ptger4        | 1.4 | 0 | 334 | p1                 |
| Cd7           | 1.4 | 0 | 340 | p1                 |
| Med7          | 1.4 | 0 | 470 | p1                 |
| Jak2          | 1.4 | 0 | 475 | p1                 |
| Marveld2      | 1.4 | 0 | 688 | p1                 |
| Gla           | 1.4 | 0 | 704 | p1                 |
| Bcl2l1        | 1.4 | 0 | 127 | p0, p1, p1, p0     |
| Rgs3          | 1.4 | 0 | 174 | p3, p3, p1         |
| Abi2          | 1.4 | 0 | 270 | p3, p1             |
| Tnfrsf9       | 1.4 | 0 | 403 | p0, p1             |
| Ctnna1        | 1.3 | 0 | 0   | p1                 |
| Kif23         | 1.3 | 0 | 0   | p1                 |
| Zik1          | 1.3 | 0 | 0   | p1                 |
| LOC73899      | 1.3 | 0 | 0   | p1                 |
| Perp          | 1.3 | 0 | 0   | p1                 |

|               |     |   |     |                    |
|---------------|-----|---|-----|--------------------|
| Mettl7a1      | 1.3 | 0 | 231 | p1                 |
| Lpin2         | 1.3 | 0 | 282 | p1                 |
| Acpl2         | 1.3 | 0 | 304 | p1                 |
| Lcn4          | 1.3 | 0 | 329 | p1                 |
| Klf10         | 1.3 | 0 | 465 | p1                 |
| Nudt4         | 1.3 | 0 | 534 | p1                 |
| Mki67         | 1.3 | 0 | 535 | p1                 |
| Txnrd1        | 1.3 | 0 | 589 | p1                 |
| Fryl          | 1.3 | 0 | 632 | p1                 |
| Ubash3b       | 1.3 | 0 | 637 | p1                 |
| Id2           | 1.3 | 0 | 19  | p3, p3, p1         |
| Ccdc50        | 1.3 | 0 | 91  | p3, p3, p2, p1     |
| Pvt1          | 1.3 | 0 | 256 | p2, p1, p1         |
| Slco3a1       | 1.3 | 0 | 348 | p0, p1, p1         |
| Cd47          | 1.3 | 0 | 445 | p3, p0, p1, p1     |
| Dynlt3        | 1.3 | 0 | 487 | p2, p3, p1         |
| Serpini1      | 1.2 | 0 | 0   | p1                 |
| Rpap3         | 1.2 | 0 | 0   | p1                 |
| Sult2b1       | 1.2 | 0 | 0   | p1                 |
| Gpr65         | 1.2 | 0 | 0   | p1                 |
| Ccrn4l        | 1.2 | 0 | 0   | p1                 |
| 5930433N17Rik | 1.2 | 0 | 0   | p1                 |
| A630035D09Rik | 1.2 | 0 | 0   | p1                 |
| Got1          | 1.2 | 0 | 0   | p1                 |
| Elk3          | 1.2 | 0 | 0   | p1                 |
| Tanc2         | 1.2 | 0 | 0   | p1                 |
| Cdc42ep3      | 1.2 | 0 | 150 | p1                 |
| Dennd4a       | 1.2 | 0 | 175 | p1                 |
| Myadm         | 1.2 | 0 | 238 | p1                 |
| Gfod1         | 1.2 | 0 | 288 | p1                 |
| Mthfs         | 1.2 | 0 | 293 | p1                 |
| Errfi1        | 1.2 | 0 | 330 | p1                 |
| Vopp1         | 1.2 | 0 | 358 | p1                 |
| Slc15a3       | 1.2 | 0 | 482 | p1                 |
| Map2k3        | 1.2 | 0 | 529 | p1                 |
| Rhof          | 1.2 | 0 | 633 | p1                 |
| Gem           | 1.2 | 0 | 654 | p1                 |
| Glipr1        | 1.2 | 0 | 697 | p1                 |
| Pygl          | 1.2 | 0 | 699 | p1                 |
| Tiparp        | 1.2 | 0 | 0   | p0, p1, p1         |
| Ccnd2         | 1.2 | 0 | 0   | p0, p0, p1         |
| Cobll1        | 1.2 | 0 | 43  | p3, p1             |
| Ms4a6d        | 1.2 | 0 | 117 | p3, p1             |
| Hip1          | 1.2 | 0 | 151 | p0, p1             |
| Itga4         | 1.2 | 0 | 154 | p2, p0, p0, p0, p1 |
| Smad3         | 1.2 | 0 | 166 | p3, p1             |
| Litaf         | 1.2 | 0 | 391 | p3, p1             |
| Plxnc1        | 1.2 | 0 | 413 | p2, p0, p1         |
| St6galnac4    | 1.2 | 0 | 435 | p3, p1             |
| Cpox          | 1.2 | 0 | 472 | p2, p1             |
| Slc37a3       | 1.1 | 0 | 0   | p1                 |
| Iars          | 1.1 | 0 | 0   | p1                 |
| Kbtbd7        | 1.1 | 0 | 0   | p1                 |
| Ehd4          | 1.1 | 0 | 0   | p1                 |
| Klf4          | 1.1 | 0 | 0   | p1                 |
| Baz1a         | 1.1 | 0 | 0   | p1                 |
| Ptgfrn        | 1.1 | 0 | 0   | p1                 |
| Luzp1         | 1.1 | 0 | 0   | p1                 |
| Dtl           | 1.1 | 0 | 0   | p1                 |
| Aim2          | 1.1 | 0 | 0   | p1                 |
| Gabarapl1     | 1.1 | 0 | 0   | p1                 |
| 2310079F09Rik | 1.1 | 0 | 0   | p1                 |
| Chst12        | 1.1 | 0 | 0   | p1                 |
| Arhgap21      | 1.1 | 0 | 0   | p1                 |
| Maf           | 1.1 | 0 | 0   | p1                 |
| Gata3         | 1.1 | 0 | 99  | p1                 |
| Pik3ap1       | 1.1 | 0 | 113 | p1                 |
| Cysltr2       | 1.1 | 0 | 233 | p1                 |

|               |     |   |      |            |
|---------------|-----|---|------|------------|
| Slc4a7        | 1.1 | 0 | 258  | p1         |
| Plekhg3       | 1.1 | 0 | 279  | p1         |
| Ptpn3         | 1.1 | 0 | 285  | p1         |
| Tmem140       | 1.1 | 0 | 429  | p1         |
| Sypl          | 1.1 | 0 | 449  | p1         |
| Tnfrsf18      | 1.1 | 0 | 477  | p1         |
| Mapk12        | 1.1 | 0 | 582  | p1         |
| Samsn1        | 1.1 | 0 | 600  | p1         |
| D8Ert82e      | 1.1 | 0 | 639  | p1         |
| D16Ert472e    | 1.1 | 0 | 710  | p1         |
| Nfkbiz        | 1.1 | 0 | -580 | p1, p0     |
| Abhd5         | 1.1 | 0 | 0    | p0, p1     |
| Hs3st3b1      | 1.1 | 0 | 144  | p3, p1     |
| Gramd1b       | 1.1 | 0 | 172  | p3, p1     |
| Atp10a        | 1.1 | 0 | 347  | p0, p0, p1 |
| Tnfaip3       | 1.1 | 0 | 607  | p0, p1     |
| Mad2l1        | 1   | 0 | 0    | p1         |
| Tmed5         | 1   | 0 | 0    | p1         |
| Pawr          | 1   | 0 | 0    | p1         |
| Parp12        | 1   | 0 | 0    | p1         |
| Cd72          | 1   | 0 | 0    | p1         |
| Slc5a3        | 1   | 0 | 0    | p1         |
| Cdc14a        | 1   | 0 | 0    | p1         |
| 3830612M24    | 1   | 0 | 0    | p1         |
| Homer1        | 1   | 0 | 0    | p1         |
| Slc7a1        | 1   | 0 | 0    | p1         |
| Mapre2        | 1   | 0 | 108  | p1         |
| Tmem154       | 1   | 0 | 132  | p1         |
| Zcchc18       | 1   | 0 | 222  | p1         |
| Stat4         | 1   | 0 | 302  | p1         |
| Il15          | 1   | 0 | 312  | p1         |
| Wee1          | 1   | 0 | 402  | p1         |
| Parp8         | 1   | 0 | 522  | p1         |
| Cpeb2         | 1   | 0 | 574  | p1         |
| 9630033F20Rik | 1   | 0 | 605  | p1         |
| Sec24d        | 1   | 0 | 646  | p1         |
| Hps4          | 1   | 0 | 687  | p1         |
| 2410127L17Rik | 1   | 0 | 0    | p0, p1     |
| Stx11         | 1   | 0 | 227  | p3, p1     |

#### HP1 - Downregulated genes

| Gene          | FluH-NaH | TimH-NaH | RankMeta | Classe profils               |
|---------------|----------|----------|----------|------------------------------|
| Slc6a19       | -2.9     | 0        | -15      | p1m                          |
| Ift80         | -2.6     | 0        | -10      | p1m                          |
| Tmie          | -2.5     | 0        | -78      | p1m                          |
| Klf7          | -2.4     | 0        | -185     | p3m, p1m, p1m, p1m           |
| Als2cl        | -2.2     | 0        | -63      | p1m                          |
| Klf3          | -2.2     | 0        | -236     | p3m, p1m, p1m, p1m, p1m, p1m |
| Klf2          | -2.1     | 0        | -311     | p1m                          |
| Ccr7          | -2       | 0        | -39      | p1m                          |
| A930005H10Rik | -1.9     | 0        | -196     | p1m                          |
| Actn1         | -1.8     | 0        | -14      | p1m                          |
| D530037H12Rik | -1.8     | 0        | 0        | p1m                          |
| Smc4          | -1.7     | 0        | -45      | p1m                          |
| Fam101b       | -1.6     | 0        | -81      | p1m                          |
| Myb           | -1.5     | 0        | -176     | p1m                          |
| Prkd2         | -1.5     | 0        | -100     | p1m                          |
| Cyp2d22       | -1.5     | 0        | 0        | p1m                          |
| Cd55          | -1.5     | 0        | -77      | p1m, p1m, p0                 |
| Hspb11        | -1.3     | 0        | -169     | p1m                          |
| Ccnd3         | -1.3     | 0        | 0        | p1m                          |
| Satb1         | -1.3     | 0        | -147     | p2m, p2m, p2m, p2m, p1m      |
| Slc43a2       | -1.3     | 0        | -55      | p3m, p1m, p1m                |
| Pgpep1l       | -1.2     | 0        | -509     | p1m                          |
| Ugcg          | -1.2     | 0        | -310     | p1m                          |
| Il6ra         | -1.2     | 0        | -50      | p1m                          |
| 4930520K10Rik | -1.2     | 0        | 0        | p1m                          |
| Adk           | -1.2     | 0        | -58      | p2m, p3m, p1m, p1m           |

|               |      |   |      |                    |
|---------------|------|---|------|--------------------|
| Trib2         | -1.2 | 0 | -28  | p1m, p0            |
| Il6st         | -1.2 | 0 | -19  | p2m, p2m, p1m, p1m |
| Emp3          | -1.1 | 0 | -773 | p1m                |
| Crif3         | -1.1 | 0 | -448 | p1m                |
| Thada         | -1.1 | 0 | -327 | p1m                |
| Ypel2         | -1.1 | 0 | -290 | p1m                |
| Tmc6          | -1.1 | 0 | -271 | p1m                |
| Stk38         | -1.1 | 0 | -235 | p1m                |
| Lipa          | -1.1 | 0 | -75  | p1m                |
| Pdk1          | -1.1 | 0 | -53  | p1m                |
| 9430025N12Rik | -1.1 | 0 | 0    | p1m                |
| Rasgrp2       | -1.1 | 0 | -336 | p2m, p1m, p1m      |
| Mettl9        | -1   | 0 | -316 | p1m                |
| Cyb5          | -1   | 0 | -162 | p1m                |
| Qser1         | -1   | 0 | -87  | p1m                |
| N4bp2         | -1   | 0 | -82  | p1m                |

**SUPPLEMENTARY TABLE S4.** Genes with a fold change of at least 2 in the FLU-TM to Naive comparison and belonging to one of the six following profiles HP2 are shown. FC for the TIM to naive comparison are given. If the gene was found in the meta-analysis (tables S9, 10 and 11) its rank is given. For certain genes multiple probe sets are present on the Affymetrix microarrays, the profile for each probe set is given.

HP2 - Upregulated genes

| Gene      | FluH-NaH | TimH-NaH | RankMeta | Classe profils |
|-----------|----------|----------|----------|----------------|
| AW555464  | 1        | 0,6      | 0        | p2             |
| Socs5     | 1        | 0.7      | 0        | p2             |
| Myo1d     | 1.1      | 0.8      | 0        | p2             |
| Lman1     | 1.1      | 0.8      | 0        | p2             |
| Cd52      | 1        | 0.8      | 0        | p2             |
| Gm10345   | 1.1      | 0.8      | 0        | p2             |
| Dus4l     | 1.3      | 0.8      | 0        | p2             |
| Dyx1c1    | 1        | 0.9      | 0        | p2             |
| Ttf2      | 1.1      | 0.9      | 0        | p2             |
| Ube2t     | 1.1      | 0.9      | 0        | p2             |
| Cdca5     | 1.7      | 1        | 0        | p2             |
| Ezh2      | 1.6      | 1        | 0        | p2             |
| Rab20     | 1.1      | 1.1      | 0        | p2             |
| LOC641050 | 1.3      | 1.1      | 0        | p2             |
| Gsg2      | 1.6      | 1.2      | 0        | p2             |
| Gm13152   | 1.9      | 1.4      | 0        | p2             |
| Gm20265   | 2.8      | 3.2      | 0        | p2             |
| lfng      | 7.6      | 6.3      | 5        | p2             |
| Slamf7    | 3.2      | 2.3      | 25       | p2             |
| Il2ra     | 2.3      | 1.4      | 54       | p2             |
| Ttc39b    | 1.9      | 1.7      | 65       | p2             |
| Ppm1j     | 1.7      | 1.3      | 74       | p2             |
| Il12rb2   | 1.2      | 1.2      | 75       | p2             |
| Asns      | 4.1      | 3.7      | 79       | p2             |
| Ly6a      | 2.3      | 2.5      | 88       | p2             |
| Pogk      | 1.2      | 0.9      | 100      | p2             |
| Pion      | 1        | 0.7      | 104      | p2             |
| N4bp1     | 1.4      | 0.9      | 115      | p2             |
| Kcnk6     | 3.3      | 2.7      | 116      | p2             |
| Fgf13     | 1.6      | 1.2      | 120      | p2             |
| Efhd2     | 1.8      | 1.4      | 124      | p2             |
| Tspan31   | 1.2      | 1.1      | 131      | p2             |
| Gab3      | 1        | 0.8      | 136      | p2             |
| Ms4a4c    | 2.7      | 2.8      | 138      | p2             |
| Prkar2a   | 1.2      | 0.7      | 153      | p2             |
| Rnf138    | 2.4      | 1.9      | 158      | p2             |
| Gimap7    | 1.6      | 1.8      | 163      | p2             |
| Dennd4c   | 1.5      | 1        | 178      | p2             |
| Ggh       | 1.4      | 0.8      | 181      | p2             |
| Pla2g16   | 1.8      | 1.7      | 192      | p2             |
| AW112010  | 1.6      | 1.2      | 195      | p2             |
| Sidt1     | 2.4      | 2.5      | 203      | p2             |
| Prr13     | 1.1      | 0.9      | 204      | p2             |
| Ctsw      | 1.6      | 1.3      | 215      | p2             |
| Ctla4     | 3        | 3.4      | 217      | p2             |
| Vmp1      | 2.4      | 2.2      | 236      | p2             |
| Scpep1    | 1.3      | 1.1      | 267      | p2             |
| Mapk11    | 1        | 0.8      | 277      | p2             |
| Golm1     | 1.6      | 1.1      | 281      | p2             |
| Lpxn      | 1.3      | 0.9      | 298      | p2             |
| Atxn1     | 1.6      | 1.2      | 316      | p2             |

|               |     |     |     |                        |
|---------------|-----|-----|-----|------------------------|
| Oplah         | 1.1 | 0.8 | 331 | p2                     |
| Ncf4          | 1.6 | 1.1 | 335 | p2                     |
| 3830406C13Rik | 1.5 | 1   | 349 | p2                     |
| Ksr1          | 1   | 0.6 | 351 | p2                     |
| Cyfp1         | 1.3 | 0.8 | 355 | p2                     |
| Man2a1        | 1.1 | 0.7 | 366 | p2                     |
| Gsto1         | 1.6 | 1.2 | 374 | p2                     |
| Bag3          | 1.2 | 0.8 | 376 | p2                     |
| Pmaip1        | 1.2 | 0.9 | 387 | p2                     |
| Clic4         | 2.2 | 1.6 | 395 | p2                     |
| Sfi1          | 2.2 | 2.3 | 401 | p2                     |
| 2610029I01Rik | 1.5 | 1.3 | 404 | p2                     |
| Ap1s2         | 1   | 0.7 | 406 | p2                     |
| Ank           | 1.1 | 0.9 | 411 | p2                     |
| Atp11a        | 1.6 | 1.3 | 417 | p2                     |
| Kbtbd11       | 1.1 | 0.8 | 466 | p2                     |
| Trim30d       | 1.3 | 1.2 | 492 | p2                     |
| Fam92a        | 1.3 | 1.1 | 530 | p2                     |
| Tbc1d12       | 1.5 | 0.8 | 532 | p2                     |
| Chst2         | 1.2 | 0.9 | 597 | p2                     |
| Dhrs7         | 1.1 | 0.7 | 628 | p2                     |
| Mns1          | 1.1 | 0.8 | 638 | p2                     |
| Slc12a2       | 1.1 | 0.8 | 0   | p2. p0. p0             |
| Tpi1          | 1.1 | 0.9 | 0   | p0. p2                 |
| Lpgat1        | 1   | 0.9 | 0   | p2. p0                 |
| Nrp1          | 3.4 | 2.6 | 50  | p3. p2. p3. p2         |
| Adam19        | 2   | 1.5 | 80  | p2. p3                 |
| Ccdc50        | 2.2 | 1.6 | 91  | p3. p3. p2. p1         |
| Dock9         | 1.6 | 0.9 | 137 | p3. p2. p0             |
| Itga4         | 1.1 | 0.7 | 154 | p2. p0. p0. p0. p1     |
| Arsb          | 1.1 | 0.8 | 164 | p2. p0                 |
| Chpt1         | 1.9 | 1.2 | 188 | p2. p0                 |
| Rhoc          | 1.1 | 0.7 | 191 | p0. p2                 |
| Dnaja4        | 2.3 | 1.7 | 232 | p3. p3. p2             |
| Pvt1          | 1.1 | 1.1 | 256 | p2. p1. p1             |
| Icos          | 2.1 | 1.4 | 271 | p3. p2. p3             |
| Lass4         | 1.2 | 1   | 294 | p2. p0                 |
| Smyd1         | 1.2 | 0.9 | 310 | p0. p2. p0             |
| Hip1r         | 1   | 0.8 | 339 | p2. p3                 |
| Sor11         | 1.4 | 0.8 | 357 | p3. p2                 |
| Plxnc1        | 1.5 | 0.9 | 413 | p2. p0. p1             |
| Cpox          | 1.1 | 0.7 | 472 | p2. p1                 |
| Dynlt3        | 1.3 | 0.7 | 487 | p2. p3. p1             |
| Cd8a          | 1   | 0.6 | 615 | p2. p0. p0. p0         |
| Nfat5         | 1.2 | 0.8 | 626 | p2. p2. p3. p0. p2. p2 |

#### HP2 - Down regulated genes

| Gene          | FluH-NaH | TimH-NaH | RankMeta | Classe profils |
|---------------|----------|----------|----------|----------------|
| Stk3          | -1.2     | -1.5     | -727     | p2m            |
| Sh3bp5        | -1       | -1       | -653     | p2m            |
| Itk           | -1.1     | -0.9     | -486     | p2m            |
| 2810410L24Rik | -1.1     | -1       | -474     | p2m            |
| Tuba1a        | -1       | -0.7     | -461     | p2m            |
| Tsc22d3       | -1.2     | -1       | -392     | p2m            |
| Abcg2         | -1.4     | -1.2     | -389     | p2m            |
| Ppm1l         | -1.2     | -0.7     | -355     | p2m            |
| Fnbp1l        | -1.7     | -1.9     | -324     | p2m            |
| Snn           | -1.1     | -0.7     | -322     | p2m            |
| Cux1          | -1.5     | -1.2     | -314     | p2m            |
| Txk           | -1.2     | -0.9     | -313     | p2m            |
| Chd2          | -1.1     | -0.8     | -308     | p2m            |

|               |      |      |      |     |
|---------------|------|------|------|-----|
| Arrb1         | -1   | -1   | -303 | p2m |
| Ptpla         | -1.1 | -0.7 | -284 | p2m |
| Cyp39a1       | -1   | -1.2 | -283 | p2m |
| Plcx2         | -1.2 | -1.3 | -280 | p2m |
| Aldh2         | -1.2 | -0.8 | -275 | p2m |
| Ccm2          | -1.1 | -0.8 | -266 | p2m |
| Setd7         | -1.2 | -0.8 | -260 | p2m |
| Ggta1         | -1   | -1.2 | -256 | p2m |
| Dusp1         | -1.5 | -1.4 | -242 | p2m |
| Dapk1         | -1.1 | -0.8 | -225 | p2m |
| Timeless      | -1.2 | -0.8 | -221 | p2m |
| Rab4a         | -2.7 | -2.3 | -207 | p2m |
| Rheb1         | -1.1 | -1   | -193 | p2m |
| Ppm1h         | -1.2 | -0.7 | -188 | p2m |
| Nedd4l        | -1   | -0.8 | -186 | p2m |
| Gprc5b        | -1.1 | -1   | -183 | p2m |
| Irf6          | -1.1 | -1.6 | -172 | p2m |
| Bend5         | -1   | -1.2 | -164 | p2m |
| Pard6g        | -1.6 | -1.4 | -159 | p2m |
| Sqrdl         | -1.4 | -1.1 | -153 | p2m |
| Laptm4b       | -1.8 | -1.8 | -148 | p2m |
| Cnksr3        | -1.8 | -1.5 | -138 | p2m |
| Ramp3         | -1.8 | -1.6 | -136 | p2m |
| Pou2af1       | -1.5 | -1.1 | -127 | p2m |
| Nrip1         | -1.2 | -1.3 | -120 | p2m |
| Abca1         | -1.3 | -1   | -118 | p2m |
| Kif13a        | -1.5 | -1.4 | -111 | p2m |
| Gtf2ird1      | -1.1 | -1   | -104 | p2m |
| Zdhhc14       | -1.7 | -1.7 | -101 | p2m |
| Tcf7l2        | -2.1 | -2   | -99  | p2m |
| Scml4         | -1   | -0.6 | -98  | p2m |
| Spnb2         | -1.4 | -1   | -96  | p2m |
| 2410066E13Rik | -1.5 | -1.3 | -92  | p2m |
| Cd81          | -1.5 | -1.5 | -88  | p2m |
| Tubb2a        | -2   | -2.2 | -74  | p2m |
| Sfmbt2        | -1.4 | -2   | -68  | p2m |
| Sepp1         | -1.5 | -1.3 | -64  | p2m |
| Basp1         | -2.9 | -2.8 | -62  | p2m |
| Dusp10        | -1.7 | -1.3 | -60  | p2m |
| Ldhb          | -2.8 | -2.9 | -59  | p2m |
| Baz2b         | -2.6 | -2.6 | -56  | p2m |
| Ralgps2       | -1.9 | -1.4 | -47  | p2m |
| Tubb2b        | -4.2 | -3.6 | -44  | p2m |
| Plaur         | -1.6 | -1.6 | -43  | p2m |
| Sesn1         | -1.7 | -1.5 | -42  | p2m |
| Sgk3          | -1.3 | -1.2 | -41  | p2m |
| Cxxc5         | -1.5 | -1.2 | -38  | p2m |
| Gpr146        | -1.3 | -1.3 | -35  | p2m |
| Plekho1       | -1.4 | -1.2 | -31  | p2m |
| Ppic          | -2   | -1.5 | -29  | p2m |
| Gsn           | -1.5 | -1.3 | -27  | p2m |
| Lass6         | -1   | -0.7 | -26  | p2m |
| Ramp1         | -1.8 | -1.6 | -25  | p2m |
| Cd24a         | -2.8 | -3.6 | -24  | p2m |
| Mtss1         | -1.9 | -2.2 | -20  | p2m |
| Trat1         | -2.4 | -2.6 | -18  | p2m |
| Sox4          | -4.7 | -5.3 | -16  | p2m |
| Timp2         | -2   | -2.2 | -12  | p2m |
| Xkrx          | -1.9 | -1.8 | -9   | p2m |
| Itgae         | -1.9 | -2.2 | -7   | p2m |
| Utp14b        | -1.7 | -1.6 | 0    | p2m |



|               |      |      |      |                         |
|---------------|------|------|------|-------------------------|
| LOC552908     | -1.8 | -1.5 | 0    | p2m                     |
| A230058F20Rik | -1   | -1   | 0    | p2m                     |
| C230085N15Rik | -1.4 | -1   | 0    | p2m                     |
| Ptprf         | -1.1 | -1   | 0    | p2m                     |
| 9430027B09Rik | -1.3 | -0.9 | 0    | p2m                     |
| Gm19597       | -1.2 | -0.9 | 0    | p2m                     |
| E430014B02Rik | -1.2 | -0.8 | 0    | p2m                     |
| 2310050P20Rik | -1.1 | -0.8 | 0    | p2m                     |
| Rasgrp2       | -1   | -0.8 | -336 | p2m. p1m. p1m           |
| Bend4         | -1.1 | -0.8 | -222 | p0. p2m                 |
| Hivep3        | -1.9 | -2   | -209 | p2m. p0                 |
| Pde4b         | -1   | -0.8 | -173 | p2m. p3m                |
| Cmah          | -1.1 | -0.7 | -170 | p3m. p3m. p3m. p2m      |
| Dusp16        | -1.3 | -1.2 | -158 | p2m. p0                 |
| Satb1         | -1.1 | -1   | -147 | p2m. p2m. p2m. p2m. p1m |
| Tspan13       | -1.2 | -0.8 | -103 | p2m. p3m                |
| Adk           | -1.5 | -0.9 | -58  | p2m. p3m. p1m. p1m      |
| Tspan32       | -1.2 | -0.7 | -51  | p3m. p2m                |
| Inadl         | -2.4 | -1.9 | -40  | p2m. p2m. p3m. p3m      |
| Acsl3         | -2.7 | -2.2 | -37  | p2m. p2m. p0            |
| Tox           | -1.6 | -1.4 | -33  | p2m. p0                 |
| Chst15        | -2.1 | -1.5 | -22  | p2m. p0                 |
| Il6st         | -1.2 | -0.9 | -19  | p2m. p2m. p1m. p1m      |
| Dntt          | -1.5 | -1.3 | -17  | p3m. p3m. p2m           |
| Ikzf2         | -3.2 | -3.8 | -11  | p6m. p2m. p2m           |
| Igfbp4        | -2.4 | -1.3 | -4   | p2m. p3m. p2m           |
| Atp1b1        | -1.9 | -1.6 | -2   | p3m. p2m. p3m. p3m      |
| Ccr9          | -3.9 | -3.5 | -1   | p3m. p2m. p2m           |
| Cap1          | -1.5 | -1.4 | 0    | p2m. p0                 |
| Tmlhe         | -1.3 | -1.1 | 0    | p3m. p3m. p3m. p2m      |

**SUPPLEMENTARY TABLE S5.** Genes with a fold change of at least 2 in the FLU-TM to Naive comparison and belonging to one of the six following profiles HP3 are shown. FC for the TIM to naive comparison are given. If the gene was found in the meta-analysis (tables S9, 10 and 11) its rank is given. For certain genes multiple probe sets are present on the Affymetrix microarrays, the profile for each probe set is given.

| HP3 - Upregulated genes |          |          |          |                |
|-------------------------|----------|----------|----------|----------------|
| Gene                    | FluH-NaH | TimH-NaH | RankMeta | Classe profils |
| W91776                  | 1.2      | 0.5      | 0        | p3             |
| Top2a                   | 1.4      | 0.6      | 0        | p3             |
| Rnf128                  | 1.6      | 0.6      | 0        | p3             |
| Ddx43                   | 1.9      | 0.7      | 0        | p3             |
| 6530402F18Rik           | 1.2      | 0.7      | 0        | p3             |
| B830008J18Rik           | 1.8      | 0.7      | 0        | p3             |
| Gm14446                 | 1.8      | 1        | 0        | p3             |
| 6330509M05Rik           | 2.7      | 1.5      | 0        | p3             |
| Klrc1                   | 9.5      | 6.3      | 1        | p3             |
| Ccl5                    | 7.3      | 5.6      | 2        | p3             |
| S100a6                  | 6.4      | 5.6      | 3        | p3             |
| Cxcr3                   | 6.5      | 6        | 4        | p3             |
| Itgax                   | 4        | 2.2      | 8        | p3             |
| Klrc1                   | 5.7      | 4.2      | 9        | p3             |
| Fasl                    | 6.3      | 3.7      | 10       | p3             |
| Cd44                    | 7.2      | 4.4      | 11       | p3             |
| Il18rap                 | 3.6      | 2.3      | 12       | p3             |
| Klrc2                   | 6.1      | 2.9      | 13       | p3             |
| Tbx21                   | 4.7      | 3.4      | 14       | p3             |
| S100a4                  | 4.1      | 1.2      | 15       | p3             |
| Gzmk                    | 6.1      | 1.6      | 16       | p3             |
| Kcnj8                   | 2.3      | 0.5      | 17       | p3             |
| Casp1                   | 4.4      | 2.1      | 18       | p3             |
| Runx2                   | 5.4      | 2.6      | 20       | p3             |
| Gzmb                    | 4.1      | 2.1      | 21       | p3             |
| Bhlhe40                 | 3.7      | 1.4      | 23       | p3             |
| Nt5e                    | 4.6      | 2        | 24       | p3             |
| Ctla2a                  | 2.6      | 1.7      | 27       | p3             |
| Klrg1                   | 1.6      | 0.9      | 28       | p3             |
| Ctla2b                  | 3.3      | 1.8      | 29       | p3             |
| Hopx                    | 3        | 2.1      | 31       | p3             |
| Dmrta1                  | 3.5      | 0.8      | 32       | p3             |
| 5430427O19Rik           | 4.4      | 3.4      | 33       | p3             |
| Casp4                   | 4.2      | 2.1      | 35       | p3             |
| Myo1f                   | 3.2      | 1.8      | 36       | p3             |
| Klrc3                   | 4.9      | 1.9      | 38       | p3             |
| Rgs1                    | 3.9      | 2        | 39       | p3             |
| Ahnak                   | 3.2      | 1.9      | 40       | p3             |
| Cxcr6                   | 3.4      | 0.9      | 45       | p3             |
| Camk2n1                 | 3.1      | 2.2      | 47       | p3             |
| Il18r1                  | 2.7      | 1.4      | 49       | p3             |
| Anxa2                   | 2.5      | 1.3      | 51       | p3             |
| Gnptab                  | 3.5      | 2.2      | 56       | p3             |
| Cdh1                    | 4.2      | 1.8      | 57       | p3             |
| St3gal6                 | 3.2      | 1.5      | 58       | p3             |
| Lgals1                  | 2.1      | 1.4      | 59       | p3             |
| Fam129a                 | 2.9      | 1.5      | 61       | p3             |
| H2-Q10                  | 2        | 1.1      | 64       | p3             |
| Chsy1                   | 2.9      | 1.3      | 68       | p3             |
| Mdfic                   | 4.7      | 2.5      | 73       | p3             |
| Eil2                    | 4.3      | 2.5      | 77       | p3             |
| Sdcbp2                  | 3.3      | 2.8      | 89       | p3             |

|               |     |     |     |            |
|---------------|-----|-----|-----|------------|
| Acot7         | 2   | 1.1 | 90  | p3         |
| F2r           | 1.9 | 1   | 93  | p3         |
| Gzma          | 2.7 | 1.2 | 101 | p3         |
| Gng2          | 2.3 | 1.1 | 110 | p3         |
| Arhgap26      | 1.6 | 0.7 | 112 | p3         |
| Antxr2        | 2.9 | 1.1 | 118 | p3         |
| Csda          | 1.9 | 1.2 | 119 | p3         |
| Prss12        | 1.7 | 0.9 | 126 | p3         |
| Capn2         | 1.7 | 0.9 | 128 | p3         |
| Cst7          | 1.6 | 1   | 140 | p3         |
| Nkg7          | 2.2 | 1   | 143 | p3         |
| Tnfrsf1b      | 2.1 | 0.7 | 145 | p3         |
| Acsbg1        | 1.6 | 0.7 | 147 | p3         |
| Lax1          | 1.8 | 1.2 | 167 | p3         |
| Gbp3          | 2.7 | 0.9 | 168 | p3         |
| Coro2a        | 1.6 | 0.7 | 169 | p3         |
| Cldn12        | 2.6 | 1.6 | 170 | p3         |
| Ptpn13        | 1.5 | 0.8 | 171 | p3         |
| Snx10         | 1   | 0.6 | 179 | p3         |
| Odc1          | 2.7 | 1.7 | 182 | p3         |
| 2010002N04Rik | 2.7 | 0.8 | 190 | p3         |
| 1110067D22Rik | 2.6 | 1.1 | 196 | p3         |
| Jdp2          | 1.8 | 0.6 | 199 | p3         |
| Serpinb6b     | 2.1 | 0.9 | 200 | p3         |
| Mx1           | 2.4 | 0.7 | 202 | p3         |
| Mapkapk3      | 2.3 | 1.1 | 208 | p3         |
| Nfil3         | 2   | 0.9 | 210 | p3         |
| Stk39         | 1.4 | 0.7 | 211 | p3         |
| Fam129b       | 2.4 | 0.7 | 218 | p3         |
| Slc39a4       | 1.5 | 0.9 | 219 | p3         |
| Gvin1         | 1.9 | 1.4 | 221 | p3         |
| 4930486L24Rik | 2   | 0.8 | 224 | p3         |
| Inpp5d        | 1.8 | 0.8 | 228 | p3         |
| Cd82          | 1.3 | 0.5 | 237 | p3         |
| Sh2d2a        | 1.7 | 0.7 | 240 | p3         |
| Dstn          | 1.4 | 0.7 | 250 | p3         |
| Racgap1       | 1.8 | 0.8 | 252 | p3         |
| Usp18         | 2.1 | 0.9 | 254 | p3         |
| Ifit3         | 2.4 | 1.1 | 262 | p3         |
| Glrx          | 1.8 | 0.8 | 269 | p3         |
| Plac8         | 3   | 2.1 | 303 | p3         |
| Lxn           | 1.4 | 0.9 | 315 | p3         |
| Ikzf3         | 1.8 | 1   | 320 | p3         |
| Serpinb6a     | 2.7 | 1.4 | 322 | p3         |
| Carhsp1       | 1.4 | 0.7 | 328 | p3         |
| Fam110a       | 1.8 | 0.8 | 345 | p3         |
| Stap1         | 1.5 | 0.6 | 353 | p3         |
| Lcp1          | 1.4 | 1   | 362 | p3         |
| Pik3cg        | 1.2 | 0.6 | 363 | p3         |
| 201011101Rik  | 1.5 | 0.9 | 379 | p3         |
| Gpr68         | 1.6 | 1   | 380 | p3         |
| Ifi203        | 1.8 | 0.7 | 381 | p3         |
| Rnf19b        | 1.4 | 0.8 | 485 | p3         |
| Cd2           | 1.1 | 0.4 | 539 | p3         |
| Capg          | 1.5 | 0.6 | 554 | p3         |
| Impa2         | 1.7 | 0.5 | 573 | p3         |
| Aars          | 1   | 0.5 | 610 | p3         |
| Bicap         | 1   | 0.5 | 630 | p3         |
| Aen           | 1.3 | 0.7 | 709 | p3         |
| Plek          | 5.2 | 1.4 | 6   | p3, p1, p1 |
| Ccr5          | 3.7 | 1.3 | 7   | p3, p1, p1 |

|            |     |     |     |                            |
|------------|-----|-----|-----|----------------------------|
| Id2        | 4.1 | 1   | 19  | p3, p3, p1                 |
| Itgb1      | 3   | 1.2 | 34  | p3, p3, p1                 |
| Eomes      | 5   | 1.6 | 42  | p3, p1                     |
| Cobll1     | 4.3 | 2   | 43  | p3, p1                     |
| Nrp1       | 2.1 | 1.2 | 50  | p3, p2, p3, p2             |
| Kcnk5      | 2.3 | 0.5 | 52  | p3, p0                     |
| Car5b      | 2.1 | 0.8 | 67  | p3, p1                     |
| Endod1     | 3.8 | 2.7 | 71  | p3, p3, p3, p1             |
| Chst11     | 2   | 1   | 72  | p3, p0                     |
| Adam19     | 2.6 | 2.2 | 80  | p2, p3                     |
| Atf6       | 2.4 | 1.6 | 85  | p3, p3, p0                 |
| Ccdc50     | 2   | 1   | 91  | p3, p3, p2, p1             |
| Plscr1     | 3.8 | 2.5 | 105 | p3, p3, p0                 |
| Ms4a6d     | 1.3 | 0.6 | 117 | p3, p1                     |
| Dock9      | 1.4 | 0.8 | 137 | p3, p2, p0                 |
| Abcb1a     | 2.2 | 0.7 | 139 | p3, p1                     |
| Tmem2      | 2   | 0.7 | 141 | p3, p1, p1                 |
| Hs3st3b1   | 3   | 0.9 | 144 | p3, p1                     |
| Atxn711    | 1.5 | 0.6 | 149 | p3, p0                     |
| Alcam      | 1.6 | 0.7 | 161 | p3, p1, p1, p1, p1         |
| Golim4     | 2.8 | 1.4 | 162 | p3, p0                     |
| Smad3      | 1.2 | 0.4 | 166 | p3, p1                     |
| Gramd1b    | 1.9 | 1   | 172 | p3, p1                     |
| Nfatc2     | 2.3 | 0.8 | 173 | p3, p1                     |
| Rgs3       | 1.6 | 1   | 174 | p3, p3, p1                 |
| Cpd        | 4.7 | 2.4 | 186 | p3, p3, p3, p0, p1, p1, p1 |
| Bcl2       | 1.7 | 0.9 | 216 | p3, p0                     |
| Stx11      | 1.9 | 1   | 227 | p3, p1                     |
| Dnaja4     | 2.1 | 1.3 | 232 | p3, p3, p2                 |
| B4galt5    | 1.2 | 0.6 | 264 | p3, p0                     |
| Abi2       | 1.5 | 0.7 | 270 | p3, p1                     |
| Icos       | 2.5 | 1.6 | 271 | p3, p2, p3                 |
| Casp3      | 1.5 | 0.8 | 273 | p3, p1                     |
| BC016495   | 2.3 | 1.1 | 278 | p0, p3, p1                 |
| Frm4b      | 3.8 | 1.1 | 333 | p3, p1, p1                 |
| Hip1r      | 1.4 | 0.9 | 339 | p2, p3                     |
| Sor11      | 1.2 | 0.6 | 357 | p3, p2                     |
| Litaf      | 2.2 | 0.5 | 391 | p3, p1                     |
| Cd86       | 2.6 | 1.3 | 421 | p3, p0                     |
| Vps54      | 1.6 | 0.8 | 427 | p3, p1, p0, p1             |
| St6galnac4 | 1.6 | 0.9 | 435 | p3, p1                     |
| Cd47       | 1.5 | 0.6 | 445 | p3, p0, p1, p1             |
| Dynt13     | 1.5 | 0.7 | 487 | p2, p3, p1                 |
| Nfat5      | 1.3 | 0.8 | 626 | p2, p2, p3, p0, p2, p2     |

HP3 - Downregulated genes

| Gene          | FluH-NaH | TimH-NaH | RankMeta | Classe profils |
|---------------|----------|----------|----------|----------------|
| Pcsk1         | -1.3     | -0.9     | -289     | p3m            |
| Pank4         | -1.1     | -0.5     | -219     | p3m            |
| Ncf1          | -1.3     | -0.5     | -139     | p3m            |
| Stambpl1      | -1.5     | -0.8     | -124     | p3m            |
| Tec           | -1.3     | -0.6     | -121     | p3m            |
| Hdac4         | -1.5     | -1       | -106     | p3m            |
| Rras2         | -2.4     | -1.2     | -79      | p3m            |
| Nipal1        | -1.8     | -1.1     | -71      | p3m            |
| Pik3ip1       | -1.9     | -0.9     | -67      | p3m            |
| Adcy6         | -1.4     | -1.1     | -57      | p3m            |
| Sell          | -2.3     | -0.7     | -49      | p3m            |
| 5730508B09Rik | -2.4     | -0.8     | -48      | p3m            |
| Afap1         | -2.3     | -1.4     | -46      | p3m            |
| Lef1          | -2.8     | -1.4     | -34      | p3m            |

|               |      |      |      |                                 |
|---------------|------|------|------|---------------------------------|
| Igf1r         | -2.8 | -1.1 | -32  | p3m                             |
| 2610019F03Rik | -2.3 | -1.3 | -23  | p3m                             |
| Id3           | -2.2 | -0.6 | -13  | p3m                             |
| Ephx1         | -2.3 | -1.3 | -6   | p3m                             |
| Ifngr2        | -2.8 | -2.3 | -5   | p3m                             |
| St6gal1       | -2.6 | -0.9 | -3   | p3m                             |
| AI131651      | -2.8 | -2.1 | 0    | p3m                             |
| BB163080      | -2.7 | -1.2 | 0    | p3m                             |
| Gm20033       | -1.6 | -1   | 0    | p3m                             |
| 6720418B01Rik | -1.7 | -1   | 0    | p3m                             |
| Bambi-ps1     | -3.8 | -1   | 0    | p3m                             |
| Gm10672       | -1.3 | -0.8 | 0    | p3m                             |
| Klf3          | -1.9 | -0.6 | -236 | p3m, p1m, p1m, p1m, p1m,<br>p1m |
| Klf7          | -1.9 | -0.5 | -185 | p3m, p1m, p1m, p1m              |
| Pde4b         | -1.2 | -0.7 | -173 | p2m, p3m                        |
| Cmah          | -1.4 | -0.8 | -170 | p3m, p3m, p3m, p2m              |
| Map4k2        | -1.1 | -0.5 | -163 | p3m, p0                         |
| Fam134b       | -1.2 | -0.7 | -157 | p0, p3m                         |
| Tspan13       | -1.3 | -0.6 | -103 | p2m, p3m                        |
| Adk           | -1.8 | -0.9 | -58  | p2m, p3m, p1m, p1m              |
| Slc43a2       | -1.5 | -0.6 | -55  | p3m, p1m, p1m                   |
| Tspan32       | -1.3 | -0.9 | -51  | p3m, p2m                        |
| Inadl         | -1.9 | -0.8 | -40  | p2m, p2m, p3m, p3m              |
| Dntt          | -4.2 | -3.4 | -17  | p3m, p3m, p2m                   |
| Cnn3          | -4.6 | -3.5 | -8   | p3m, p3m, p3m, p3m, p3m, p0     |
| Igfbp4        | -1.9 | -1.1 | -4   | p2m, p3m, p2m                   |
| Atp1b1        | -4.5 | -3.5 | -2   | p3m, p2m, p3m, p3m              |
| Ccr9          | -4.8 | -4.2 | -1   | p3m, p2m, p2m                   |
| Tmlhe         | -2.6 | -1.7 | 0    | p3m, p3m, p3m, p2m              |

**SUPPLEMENTARY TABLE S6.** Genes with a fold change of at least 2 in the FLU-TM to Naive comparison and belonging to one of the six following profiles RP1 are shown. FC for the TIM to naive comparison are given. If the gene was found in the meta-analysis (tables S9, 10 and 11) its rank is given. For certain genes multiple probe sets are present on the Affymetrix microarrays, the profile for each probe set is given.

RP1 - Upregulated genes

| Gene          | FluR | FluH | TimR | TimH | Classe profils |
|---------------|------|------|------|------|----------------|
| Il21          | 6.4  | 0    | 0    | 0    | p1             |
| Zeb2          | 4.3  | 1.5  | 0    | 0    | p3, p1, p1, p1 |
| S100a4        | 3.9  | 4.1  | 0    | 1.2  | p1             |
| Hspa1b        | 3.8  | 3.1  | 0    | 0    | p1             |
| Hspa1a        | 3.8  | 3.5  | 0    | 0    | p1             |
| Ccl9          | 3.7  | 1.3  | 0    | 0    | p1             |
| Ccr2          | 3.2  | 2.2  | 0    | 0    | p1             |
| Lancl3        | 3.2  | 2.3  | 0    | 0    | p1             |
| Ifitm3        | 3.2  | 2.7  | 0    | 0    | p1             |
| Id2           | 3.1  | 4.1  | 0    | 1    | p1, p1, p0     |
| 6230424C14Rik | 3.1  | 3.5  | 0    | 0    | p0, p1, p1     |
| Dusp4         | 3    | 1.8  | 0    | 0    | p1             |
| Serpina3g     | 3    | 2.6  | 0    | 0    | p1             |
| Ifitm1        | 3    | 3.6  | 0    | 0    | p1             |
| Ccl1          | 3    | 0    | 0    | 0    | p1             |
| Mt1           | 2.9  | 1.8  | 0    | 0    | p1             |
| Lgals3        | 2.9  | 2.8  | 0    | 0    | p1             |
| Yes1          | 2.9  | 3.1  | 0    | 0    | p1             |
| Fgl2          | 2.9  | 4.7  | 0    | 0    | p0, p1         |
| Anxa1         | 2.8  | 3    | 0    | 0    | p1             |
| Lmb1          | 2.7  | 2.4  | 0    | 0    | p1             |
| Itga1         | 2.6  | 3    | 0    | 0    | p1             |
| Ptprj         | 2.6  | 1.9  | 0    | 0    | p1, p1, p1, p3 |
| Socs2         | 2.5  | 1.7  | 0    | 0    | p1             |
| Plagl1        | 2.5  | 2.3  | 0    | 0    | p1             |
| Socs3         | 2.5  | 0    | 0    | 0    | p3, p1, p1     |
| Mpzl2         | 2.5  | 0    | 0    | 0    | p3, p1, p1     |
| Ighm          | 2.5  | 0    | 0    | 0    | p0, p1         |
| Il10          | 2.4  | 0    | 0    | 0    | p1             |
| Itgav         | 2.4  | 0    | 0    | 0    | p3, p3, p1     |
| Litaf         | 2.3  | 2.2  | 0    | 0.5  | p1             |
| Cdh1          | 2.3  | 4.2  | 0    | 1.8  | p1             |
| A630035D09Rik | 2.3  | 1.2  | 0    | 0    | p1             |
| Zdhhc2        | 2.2  | 2    | 0    | 0    | p1             |
| Abcb1b        | 2.2  | 2.4  | 0    | 0    | p1             |
| Tiparp        | 2.1  | 1.2  | 0    | 0    | p1             |
| 2310031A07Rik | 2.1  | 1.6  | 0    | 0    | p1             |
| Bcl2l1        | 2.1  | 1.4  | 0    | 0    | p3, p3, p1, p1 |
| Prdm1         | 2    | 1.1  | 0    | 0    | p1             |
| 2310079F09Rik | 2    | 1.1  | 0    | 0    | p1             |
| Slc30a1       | 2    | 0    | 0    | 0    | p1             |
| Osbpl3        | 2    | 1.2  | 0    | 0    | p1, p3         |
| Stx11         | 1.9  | 1.9  | 0    | 1    | p1             |
| Galnt3        | 1.9  | 0    | 0    | 0    | p1             |
| Reck          | 1.9  | 1.9  | 0    | 0    | p1             |
| Ahr           | 1.9  | 2.2  | 0    | 0    | p1             |
| Mtmr7         | 1.9  | 2.2  | 0    | 0    | p1             |
| Rrm2          | 1.9  | 0    | 0    | 0    | p1             |
| BB166591      | 1.9  | 0    | 0    | 0    | p1             |

|               |     |     |   |     |                                   |
|---------------|-----|-----|---|-----|-----------------------------------|
| Rai14         | 1.9 | 0   | 0 | 0   | p1                                |
| Scd2          | 1.8 | 0   | 0 | 0   | p1                                |
| Cdc42ep3      | 1.8 | 1.2 | 0 | 0   | p1                                |
| Cd7           | 1.8 | 1.4 | 0 | 0   | p1                                |
| Cish          | 1.8 | 1.8 | 0 | 0   | p1                                |
| Capg          | 1.7 | 1.5 | 0 | 0.6 | p1                                |
| Antxr2        | 1.7 | 2.9 | 0 | 1.1 | p1                                |
| Gm2695        | 1.7 | 0   | 0 | 0   | p1                                |
| Klf4          | 1.7 | 1.1 | 0 | 0   | p1                                |
| Sema4f        | 1.7 | 2.1 | 0 | 0   | p1                                |
| Cpd           | 1.7 | 1.9 | 0 | 0   | p3, p3, p3, p1, p0, p1, p3        |
| Coro2a        | 1.6 | 1.6 | 0 | 0.7 | p1                                |
| Bag3          | 1.6 | 1.2 | 0 | 0.8 | p1                                |
| BC005685      | 1.6 | 0   | 0 | 0   | p1                                |
| Gata3         | 1.6 | 1.1 | 0 | 0   | p1                                |
| Perp          | 1.6 | 1.3 | 0 | 0   | p1                                |
| Fcgr2b        | 1.6 | 1.6 | 0 | 0   | p1                                |
| Baiap3        | 1.6 | 1.8 | 0 | 0   | p1                                |
| Dennd5a       | 1.6 | 2.2 | 0 | 0   | p1                                |
| Galm          | 1.6 | 0   | 0 | 0   | p1                                |
| Mt2           | 1.6 | 0   | 0 | 0   | p1                                |
| Tob1          | 1.6 | 0   | 0 | 0   | p1                                |
| Itga4         | 1.6 | 1.2 | 0 | 0.7 | p1, p1, p0, p1, p1                |
| Golim4        | 1.6 | 0   | 0 | 0   | p3, p1<br>p0, p1, p1, p1, p1, p1, |
| Rora          | 1.6 | 2.2 | 0 | 0   | p1                                |
| Themis        | 1.6 | 0   | 0 | 0   | p3, p1                            |
| Fam129b       | 1.5 | 2.4 | 0 | 0.7 | p1                                |
| Dmrta1        | 1.5 | 3.5 | 0 | 0.8 | p1                                |
| Klrg1         | 1.5 | 1.6 | 0 | 0.9 | p1                                |
| E330009J07Rik | 1.5 | 0   | 0 | 0   | p1                                |
| Slc15a3       | 1.5 | 1.2 | 0 | 0   | p1                                |
| Acpl2         | 1.5 | 1.3 | 0 | 0   | p1                                |
| Csf2          | 1.5 | 0   | 0 | 0   | p1                                |
| Cxcl10        | 1.5 | 0   | 0 | 0   | p1                                |
| Gnaq          | 1.5 | 0   | 0 | 0   | p1                                |
| Efr3b         | 1.5 | 0   | 0 | 0   | p1                                |
| Slco3a1       | 1.5 | 1.2 | 0 | 0   | p3, p1, p3                        |
| Mx1           | 1.4 | 2.4 | 0 | 0.7 | p1                                |
| Mapkapk3      | 1.4 | 2.3 | 0 | 1.1 | p1                                |
| Itgam         | 1.4 | 0   | 0 | 0   | p1                                |
| Bcor          | 1.4 | 0   | 0 | 0   | p1                                |
| Dyrk3         | 1.4 | 1.1 | 0 | 0   | p1                                |
| Ptger4        | 1.4 | 1.4 | 0 | 0   | p1                                |
| Gzmm          | 1.4 | 1.4 | 0 | 0   | p1                                |
| Smpdl3b       | 1.4 | 1.7 | 0 | 0   | p1                                |
| Ret           | 1.4 | 1.9 | 0 | 0   | p1                                |
| Car2          | 1.4 | 2.2 | 0 | 0   | p1                                |
| Pdzk1         | 1.4 | 0   | 0 | 0   | p1                                |
| Fes           | 1.4 | 0   | 0 | 0   | p1                                |
| Abcb1a        | 1.4 | 2.2 | 0 | 0.7 | p1, p3                            |
| Myo1f         | 1.4 | 2.3 | 0 | 1.3 | p1, p3                            |
| Iglv1         | 1.4 | 1.1 | 0 | 0   | p1, p0                            |
| Akap13        | 1.4 | 0   | 0 | 0   | p2, p1                            |
| D13Erttd324e  | 1.3 | 0   | 0 | 0   | p1                                |
| Sema4d        | 1.3 | 0   | 0 | 0   | p1                                |
| Tulp4         | 1.3 | 0   | 0 | 0   | p1                                |
| Tnfaip3       | 1.3 | 1.1 | 0 | 0   | p1                                |

|               |     |     |   |     |                |
|---------------|-----|-----|---|-----|----------------|
| Hip1          | 1.3 | 1.2 | 0 | 0   | p1             |
| Arhgap21      | 1.3 | 1.1 | 0 | 0   | p1             |
| Kif23         | 1.3 | 1.3 | 0 | 0   | p1             |
| Esm1          | 1.3 | 1.4 | 0 | 0   | p1             |
| A930041H05Rik | 1.3 | 1.5 | 0 | 0   | p1             |
| 1700025G04Rik | 1.3 | 1.6 | 0 | 0   | p1             |
| Lmna          | 1.3 | 2.2 | 0 | 0   | p1             |
| Cited2        | 1.3 | 0   | 0 | 0   | p1             |
| Ubash3a       | 1.3 | 0   | 0 | 0   | p1             |
| Gm14005       | 1.3 | 0   | 0 | 0   | p1             |
| 4930523C07Rik | 1.3 | 0   | 0 | 0   | p1, p3, p0, p1 |
| Pde7a         | 1.3 | 0   | 0 | 0   | p3, p3, p1, p3 |
| Cd80          | 1.3 | 1.6 | 0 | 0   | p0, p1         |
| Top2a         | 1.2 | 1.4 | 0 | 0.6 | p1             |
| Stk39         | 1.2 | 1.4 | 0 | 0.7 | p1             |
| Cst7          | 1.2 | 1.6 | 0 | 1   | p1             |
| Mapkapk2      | 1.2 | 0   | 0 | 0   | p1             |
| Cx3cr1        | 1.2 | 0   | 0 | 0   | p1             |
| Fuca2         | 1.2 | 0   | 0 | 0   | p1             |
| Gca           | 1.2 | 0   | 0 | 0   | p1             |
| Wdr95         | 1.2 | 0   | 0 | 0   | p1             |
| Pik3ap1       | 1.2 | 1.1 | 0 | 0   | p1             |
| Gpr65         | 1.2 | 1.2 | 0 | 0   | p1             |
| Ifitm2        | 1.2 | 1.6 | 0 | 0   | p1             |
| Cxcr4         | 1.2 | 1.7 | 0 | 0   | p1             |
| Smad7         | 1.2 | 0   | 0 | 0   | p1             |
| 5031425E22Rik | 1.2 | 0   | 0 | 0   | p1             |
| Jmy           | 1.2 | 0   | 0 | 0   | p1             |
| BB165335      | 1.2 | 0   | 0 | 0   | p1             |
| Mylip         | 1.2 | 0   | 0 | 0   | p1             |
| Rnf19b        | 1.2 | 1.4 | 0 | 0.8 | p3, p1         |
| Fbxo30        | 1.2 | 0   | 0 | 0   | p1, p1, p0     |
| Ttc39c        | 1.2 | 1.1 | 0 | 0   | p1, p1, p3     |
| Gprin3        | 1.2 | 1.4 | 0 | 0   | p1, p0         |
| Abi2          | 1.2 | 1.4 | 0 | 0   | p3, p1         |
| Prss12        | 1.1 | 1.7 | 0 | 0.9 | p1             |
| Cd97          | 1.1 | 0   | 0 | 0   | p1             |
| AW555355      | 1.1 | 0   | 0 | 0   | p1             |
| Appl2         | 1.1 | 0   | 0 | 0   | p1             |
| Prr5l         | 1.1 | 0   | 0 | 0   | p1             |
| Optn          | 1.1 | 0   | 0 | 0   | p1             |
| Tsc22d2       | 1.1 | 0   | 0 | 0   | p1             |
| Tnfrsf25      | 1.1 | 0   | 0 | 0   | p1             |
| 3830612M24    | 1.1 | 1   | 0 | 0   | p1             |
| Dennd4a       | 1.1 | 1.2 | 0 | 0   | p1             |
| Ptgfrn        | 1.1 | 1.1 | 0 | 0   | p1             |
| Mapk12        | 1.1 | 1.1 | 0 | 0   | p1             |
| Txnrd1        | 1.1 | 1.3 | 0 | 0   | p1             |
| Il2rb         | 1.1 | 1.4 | 0 | 0   | p1             |
| Nek6          | 1.1 | 1.5 | 0 | 0   | p1             |
| Adam9         | 1.1 | 1.4 | 0 | 0   | p1             |
| Jun           | 1.1 | 0   | 0 | 0   | p1             |
| 3110027N22Rik | 1.1 | 0   | 0 | 0   | p1             |
| Spry2         | 1.1 | 0   | 0 | 0   | p1             |
| Syne2         | 1.1 | 0   | 0 | 0   | p1             |
| Mllt6         | 1.1 | 0   | 0 | 0   | p1             |
| Rhoc          | 1.1 | 0   | 0 | 0.5 | p1, p0         |
| Ahnak         | 1.1 | 1.7 | 0 | 0.7 | p1, p3         |



|          |     |     |   |     |            |
|----------|-----|-----|---|-----|------------|
| Bcl2     | 1.1 | 1.7 | 0 | 0.9 | p1, p0     |
| Nek7     | 1.1 | 0   | 0 | 0   | p1, p0     |
| Cd86     | 1.1 | 0   | 0 | 0   | p3, p1     |
| Fryl     | 1.1 | 1   | 0 | 0   | p1, p0, p0 |
| Jak2     | 1.1 | 1.4 | 0 | 0   | p0, p1     |
| Arsb     | 1.1 | 0   | 0 | 0   | p3, p1     |
| Iqgap2   | 1   | 0   | 0 | 0   | p1         |
| Fam26f   | 1   | 0   | 0 | 0   | p1         |
| Rnf216   | 1   | 1.1 | 0 | 0   | p1         |
| Baz1a    | 1   | 1.1 | 0 | 0   | p1         |
| Pygl     | 1   | 1.2 | 0 | 0   | p1         |
| Tanc2    | 1   | 1.2 | 0 | 0   | p1         |
| Gpr160   | 1   | 2.4 | 0 | 0   | p1         |
| Gpr15    | 1   | 3.2 | 0 | 0   | p1         |
| Ado      | 1   | 0   | 0 | 0   | p1         |
| Camk2g   | 1   | 0   | 0 | 0   | p1         |
| Rasgef1b | 1   | 0   | 0 | 0   | p1         |
| Fap      | 1   | 0   | 0 | 0   | p1         |
| N4bp1    | 1   | 1.4 | 0 | 0.9 | p0, p0, p1 |
| Ctnna1   | 1   | 1.3 | 0 | 0   | p0, p1     |

RP1 - Downregulated genes

| Gene          | FluR | FluH | TimR | TimH | Classe profils    |
|---------------|------|------|------|------|-------------------|
| Id3           | -2.2 | -2.2 | 0    | -0.6 | p1m               |
| Mfhas1        | -2.1 | -1.1 | 0    | 0    | p1m               |
| Pou2af1       | -2   | -1.5 | 0    | -1.1 | p1m               |
| Trib2         | -2   | -1.2 | 0    | 0    | p1m               |
| St6gal1       | -1.9 | -2.6 | 0    | -0.9 | p1m               |
| 5730508B09Rik | -1.6 | -2.4 | 0    | -0.8 | p1m               |
| Adk           | -1.6 | -1.8 | 0    | -0.9 | p1m, p1m, p0, p0  |
| Ankrd46       | -1.4 | 0    | 0    | 0    | p1m               |
| A630033H20Rik | -1.4 | 0    | 0    | 0    | p1m               |
| Klf7          | -1.4 | -2.2 | 0    | -0.5 | p1m, p0, p1m, p1m |
| Evi2a         | -1.4 | 0    | 0    | 0    | p3m, p1m          |
| Gpr18         | -1.3 | 0    | 0    | -0.5 | p1m               |
| Tbc1d30       | -1.3 | 0    | 0    | 0    | p1m               |
| Sema7a        | -1.3 | 0    | 0    | 0    | p1m               |
| 5430434G16Rik | -1.2 | 0    | 0    | 0    | p1m               |
| 2810403G07Rik | -1.2 | 0    | 0    | 0    | p1m               |
| Glrp1         | -1.2 | 0    | 0    | 0    | p1m               |
| Shmt1         | -1.2 | 0    | 0    | 0    | p1m               |
| Tspan13       | -1.2 | -1.3 | 0    | -0.6 | p0, p1m           |
| Osbpl9        | -1.2 | 0    | 0    | -0.5 | p1m, p3m, p0      |
| AI504432      | -1.1 | 0    | 0    | -0.9 | p1m               |
| Kcna3         | -1.1 | 0    | 0    | -0.5 | p1m               |
| Tcrb-J        | -1.1 | 0    | 0    | 0    | p1m               |
| Fam118a       | -1.1 | 0    | 0    | 0    | p1m               |
| Lck           | -1.1 | 0    | 0    | 0    | p1m               |
| Il6st         | -1.1 | -1.2 | 0    | 0    | p0, p0, p1m, p1m  |
| Calcr1        | -1   | 0    | 0    | -1   | p1m, p0           |
| Fam134b       | -1   | 0    | 0    | -0.8 | p1m, p3m          |
| Atp6v0b       | -1   | 0    | 0    | 0    | p0, p1m           |

**SUPPLEMENTARY TABLE S7.** Genes with a fold change of at least 2 in the FLU-TM to Naive comparison and belonging to one of the six following profiles RP2 are shown. FC for the TIM to naive comparison are given. If the gene was found in the meta-analysis (tables S9, 10 and 11) its rank is given. For certain genes multiple probe sets are present on the Affymetrix microarrays, the profile for each probe set is given.

RP2 - Upregulated genes

| Gene          | FluR | FluH | TimR | TimH | Classe profils         |
|---------------|------|------|------|------|------------------------|
| Ifng          | 7.2  | 7.6  | 7    | 6.3  | p2                     |
| Fasl          | 5    | 6.3  | 4.3  | 3.7  | p2                     |
| Cxcr3         | 4.7  | 6.5  | 4.7  | 6    | p2                     |
| Gnptab        | 3.7  | 3.5  | 3.4  | 2.2  | p2                     |
| Xcl1          | 3.5  | 2.4  | 2.4  | 0    | p2                     |
| Tnfsf9        | 3.3  | 2.2  | 1.9  | 0    | p2                     |
| 5430427O19Rik | 3.2  | 4.4  | 2.8  | 3.4  | p2                     |
| Ms4a4c        | 3    | 2.7  | 3.1  | 2.8  | p2                     |
| Kcnk6         | 3    | 3.3  | 2.7  | 2.7  | p2                     |
| Alcam         | 2.8  | 1.8  | 2.2  | 0    | p3, p3, p2, p3, p2     |
| Ccdc50        | 2.7  | 2.2  | 2.3  | 1.6  | p2                     |
| Sdcbp2        | 2.7  | 3.3  | 2.6  | 2.8  | p2                     |
| Gm20265       | 2.6  | 2.8  | 2.3  | 3.2  | p2                     |
| Rab39b        | 2.6  | 0    | 2.3  | 0    | p2                     |
| Il7r          | 2.6  | 1.1  | 1.7  | 0    | p3, p2                 |
| Tbx21         | 2.5  | 4.7  | 2.5  | 3.4  | p2                     |
| Mpzl3         | 2.5  | 0    | 1.6  | 0    | p2                     |
| Ctla4         | 2.3  | 3    | 2.3  | 3.4  | p2                     |
| Cd160         | 2.3  | 1.9  | 2.1  | 0    | p2                     |
| BC016495      | 2.3  | 1.7  | 1.6  | 0    | p3, p3, p2             |
| Gm14446       | 2.2  | 1.8  | 1.6  | 1    | p2                     |
| Dopey2        | 2.2  | 1.5  | 1.9  | 0    | p2                     |
| Phlda1        | 2.2  | 0    | 1.5  | 0    | p2                     |
| Dnaja4        | 2.1  | 2.3  | 1.9  | 1.7  | p2                     |
| Sidt1         | 2.1  | 2.4  | 1.6  | 2.5  | p2                     |
| Eea1          | 2.1  | 2.1  | 1.2  | 0    | p2                     |
| 2610027H17Rik | 2.1  | 2.2  | 1.1  | 0    | p2                     |
| Chpt1         | 2.1  | 1.9  | 1.7  | 1.2  | p2, p0                 |
| Ostf1         | 2    | 0    | 1.7  | 0.5  | p2                     |
| Sfi1          | 2    | 2.2  | 2    | 2.3  | p2                     |
| Cdc14a        | 2    | 1    | 1.4  | 0    | p2                     |
| Rabgap11      | 1.9  | 0    | 1.5  | 0.9  | p2                     |
| Rnasel        | 1.9  | 0    | 1.1  | 0    | p2                     |
| Sphk1         | 1.9  | 0    | 1.4  | 0    | p2                     |
| Hnrpll        | 1.9  | 0    | 1.3  | 0    | p2, p3                 |
| Ctsw          | 1.8  | 1.6  | 1.3  | 1.3  | p2                     |
| Ttc39b        | 1.8  | 1.9  | 1.9  | 1.7  | p2                     |
| Stat4         | 1.8  | 1    | 1.4  | 0    | p2                     |
| Enpp1         | 1.8  | 0    | 1    | 0    | p2, p3                 |
| Samhd1        | 1.7  | 0    | 1.3  | 1.2  | p2                     |
| Casp3         | 1.7  | 1.5  | 1.6  | 0.8  | p2                     |
| F2rl1         | 1.7  | 0    | 1.4  | 1    | p2                     |
| Cldn12        | 1.7  | 2.6  | 1.6  | 1.6  | p2                     |
| Gimap7        | 1.7  | 1.6  | 2    | 1.8  | p2                     |
| Slfn2         | 1.7  | 0    | 1.6  | 0    | p2                     |
| Slco4a1       | 1.7  | 0    | 1.9  | 0    | p2                     |
| Nfat5         | 1.7  | 1.3  | 1.3  | 0.8  | p2, p3, p2, p3, p3, p2 |

|               |     |     |     |     |                |
|---------------|-----|-----|-----|-----|----------------|
| Csda          | 1.7 | 1.9 | 1.1 | 1.2 | p3, p2         |
| Oxsm          | 1.7 | 0   | 0.9 | 0   | p3, p3, p2     |
| Hs3st3b1      | 1.6 | 3   | 1.2 | 0.9 | p2             |
| Golm1         | 1.6 | 1.6 | 1   | 1.1 | p2             |
| Ppm1j         | 1.6 | 1.7 | 1.1 | 1.3 | p2             |
| Gm13152       | 1.6 | 1.9 | 1.8 | 1.4 | p2             |
| Gvin1         | 1.6 | 1.9 | 1.5 | 1.4 | p2             |
| Pla2g16       | 1.6 | 1.8 | 1.2 | 1.7 | p2             |
| Tnfrsf9       | 1.6 | 1.4 | 1.1 | 0   | p2             |
| Irf8          | 1.6 | 1.5 | 1.4 | 0   | p2             |
| Map3k8        | 1.6 | 1.5 | 1.4 | 0   | p2             |
| Gbp7          | 1.6 | 2.3 | 1.2 | 0   | p2             |
| Il3           | 1.6 | 0   | 0.9 | 0   | p2             |
| Pfkip         | 1.5 | 0   | 1.6 | 0.4 | p2             |
| Gm8369        | 1.5 | 0   | 1.5 | 0.6 | p2             |
| Smpdl3a       | 1.5 | 0   | 1.3 | 0.6 | p2             |
| Klrd1         | 1.5 | 0   | 1.1 | 0.7 | p2             |
| 1110067D22Rik | 1.5 | 2.6 | 0.9 | 1.1 | p2             |
| Fam92a        | 1.5 | 1.3 | 1.3 | 1.1 | p2             |
| Epsti1        | 1.5 | 0   | 1.7 | 1.3 | p2             |
| Sh3bgrl       | 1.5 | 0   | 1   | 0   | p2             |
| 3830408D07Rik | 1.5 | 0   | 0.9 | 0   | p2             |
| Gls           | 1.5 | 1   | 1   | 0   | p2             |
| Slain1        | 1.5 | 0   | 0.9 | 0   | p2             |
| ligp1         | 1.5 | 0   | 1.8 | 0   | p2             |
| Sorl1         | 1.5 | 1.4 | 1.2 | 0.8 | p0, p2         |
| Lass4         | 1.5 | 1.2 | 1.1 | 1   | p2, p0         |
| Fam55c        | 1.4 | 0   | 1.4 | 0.7 | p2             |
| Ube2t         | 1.4 | 1.1 | 1.1 | 0.9 | p2             |
| Trim30d       | 1.4 | 1.3 | 1.6 | 1.2 | p2             |
| Atp11a        | 1.4 | 1.6 | 1.3 | 1.3 | p2             |
| Chsy1         | 1.4 | 2.9 | 0.9 | 1.3 | p2             |
| Cxcr5         | 1.4 | 1.6 | 1.7 | 2.1 | p2             |
| Traf5         | 1.4 | 0   | 1   | 0   | p2             |
| Soat2         | 1.4 | 0   | 0.9 | 0   | p2             |
| Gbp2          | 1.4 | 0   | 0.8 | 0   | p2             |
| Hvcn1         | 1.4 | 0   | 1.3 | 0   | p2             |
| Nfatc2        | 1.4 | 2.3 | 0.8 | 0.8 | p2, p0         |
| Stat1         | 1.4 | 0   | 1.1 | 1.9 | p2, p2, p0     |
| Cd8a          | 1.4 | 0   | 1.1 | 0   | p3, p2, p2, p2 |
| Spata13       | 1.4 | 0   | 0.8 | 0   | p3, p2         |
| Ggh           | 1.3 | 1.4 | 0.7 | 0.8 | p2             |
| Lpxn          | 1.3 | 1.3 | 1   | 0.9 | p2             |
| Capn2         | 1.3 | 1.7 | 0.7 | 0.9 | p2             |
| Efhd2         | 1.3 | 1.8 | 1   | 1.4 | p2             |
| Zfpn1         | 1.3 | 0   | 0.9 | 0   | p2             |
| Cd72          | 1.3 | 1   | 0.9 | 0   | p2             |
| Hexb          | 1.3 | 0   | 0.8 | 0   | p2             |
| Gm2a          | 1.3 | 0   | 0.9 | 0   | p2             |
| Vps54         | 1.3 | 1.6 | 0.9 | 0.8 | p2, p0, p0, p2 |
| Gsto1         | 1.3 | 1.6 | 0.8 | 1.2 | p0, p2         |
| Stk38l        | 1.3 | 0   | 1.1 | 0   | p2, p0         |
| Ppp3cc        | 1.2 | 0   | 0.8 | 0.7 | p2             |
| Pttg1         | 1.2 | 0   | 1.1 | 0.7 | p2             |
| Ap1s2         | 1.2 | 1   | 1   | 0.7 | p2             |

|               |     |     |     |     |            |
|---------------|-----|-----|-----|-----|------------|
| Ms4a6d        | 1.2 | 1.3 | 0.9 | 0.6 | p2         |
| B830008J18Rik | 1.2 | 1.8 | 0.7 | 0.7 | p2         |
| Ifi47         | 1.2 | 0   | 1.7 | 0.9 | p2         |
| Rab23         | 1.2 | 0   | 1.4 | 0.9 | p2         |
| Dennd4c       | 1.2 | 1.5 | 0.6 | 1   | p2         |
| Fgf13         | 1.2 | 1.6 | 1.2 | 1.2 | p2         |
| Cd48          | 1.2 | 0   | 1   | 0   | p2         |
| Slc2a3        | 1.2 | 0   | 0.9 | 0   | p2         |
| Ptpn4         | 1.2 | 0   | 0.9 | 0   | p2         |
| 5730469M10Rik | 1.2 | 1   | 1.3 | 0   | p2         |
| Anp32a        | 1.2 | 0   | 0.8 | 0   | p2         |
| Gramd3        | 1.2 | 0   | 0.6 | 0   | p2         |
| Oxr1          | 1.2 | 0   | 0.8 | 0   | p2         |
| Rbl2          | 1.2 | 0   | 0.8 | 0   | p2         |
| Ccng2         | 1.2 | 0   | 0.9 | 0   | p2         |
| Sgpp1         | 1.2 | 0   | 0.9 | 0   | p2         |
| Abhd5         | 1.2 | 0   | 0.9 | 0.6 | p2, p0     |
| Tmem2         | 1.2 | 2   | 0.9 | 0.7 | p2, p0, p0 |
| Adora2a       | 1.2 | 0   | 0.7 | 0   | p2, p3     |
| Rgs3          | 1.2 | 1.4 | 0.7 | 0   | p0, p0, p2 |
| Lpgat1        | 1.2 | 0   | 1.3 | 0   | p0, p2     |
| Laptm5        | 1.1 | 0   | 0.9 | 0.6 | p2         |
| Dhrs7         | 1.1 | 1.1 | 0.8 | 0.7 | p2         |
| Tpi1          | 1.1 | 1.1 | 0.8 | 0.9 | p2         |
| Parp14        | 1.1 | 0   | 0.9 | 0.7 | p2         |
| Man2a1        | 1.1 | 1.1 | 0.8 | 0.7 | p2         |
| Myo1d         | 1.1 | 1.1 | 0.7 | 0.8 | p2         |
| Zc3h12d       | 1.1 | 0   | 1.3 | 1.1 | p2         |
| Cks2          | 1.1 | 0   | 1.1 | 1.9 | p2         |
| Aga           | 1.1 | 0   | 0.6 | 0   | p2         |
| Ctsb          | 1.1 | 0   | 0.7 | 0   | p2         |
| Galnt7        | 1.1 | 0   | 0.9 | 0   | p2         |
| St7l          | 1.1 | 0   | 0.8 | 0   | p2         |
| Hgsnat        | 1.1 | 1.1 | 0.9 | 0   | p2         |
| Aim2          | 1.1 | 1.1 | 0.6 | 0   | p2         |
| Lta4h         | 1.1 | 0   | 0.6 | 0   | p2         |
| Lasp1         | 1.1 | 0   | 0.6 | 0   | p2         |
| Zfp703        | 1.1 | 0   | 0.6 | 0   | p2         |
| Wipf1         | 1.1 | 0   | 0.7 | 0   | p2         |
| Prps2         | 1.1 | 0   | 0.7 | 0   | p2         |
| Plxnc1        | 1.1 | 1.5 | 1   | 0.9 | p2, p0, p0 |
| St3gal6       | 1.1 | 2.1 | 0.7 | 1   | p2, p3     |
| Vamp7         | 1.1 | 0   | 0.6 | 0   | p2, p0     |
| 2410127L17Rik | 1.1 | 0   | 0.7 | 0   | p2, p0     |
| Akap13        | 1.1 | 0   | 0.9 | 0   | p2, p1     |
| Lnx2          | 1   | 0   | 0.8 | 0.5 | p2         |
| Slu7          | 1   | 0   | 0.8 | 0.6 | p2         |
| Dym           | 1   | 0   | 0.6 | 0.6 | p2         |
| Cyp4v3        | 1   | 0   | 0.9 | 0.7 | p2         |
| Tbc1d12       | 1   | 1.5 | 0.9 | 0.8 | p2         |
| Lxn           | 1   | 1.4 | 0.8 | 0.9 | p2         |
| Ncf4          | 1   | 1.6 | 0.8 | 1.1 | p2         |
| Dnajc3        | 1   | 0   | 0.8 | 0   | p2         |
| Ccpg1         | 1   | 0   | 1   | 0   | p2         |
| Rassf5        | 1   | 0   | 0.6 | 0   | p2         |

|               |   |     |     |     |        |
|---------------|---|-----|-----|-----|--------|
| Adcy7         | 1 | 0   | 0.7 | 0   | p2     |
| Plk1s1        | 1 | 0   | 0.8 | 0   | p2     |
| N4bp2l1       | 1 | 0   | 0.8 | 0   | p2     |
| 1500031L02Rik | 1 | 0   | 0.9 | 0   | p2     |
| Klhl24        | 1 | 0   | 0.9 | 0   | p2     |
| Gbp8          | 1 | 0   | 1.1 | 0   | p2     |
| Slfn1         | 1 | 0   | 1.2 | 0   | p2     |
| Tmem38b       | 1 | 0   | 0.7 | 0.6 | p2, p0 |
| Clic4         | 1 | 2.2 | 0.9 | 1.6 | p0, p2 |
| Ugp2          | 1 | 0   | 0.9 | 0   | p2, p0 |

RP2 downregulated genes

| Gene          | FluR | FluH | TimR | TimH | Classe profils    |
|---------------|------|------|------|------|-------------------|
| Hivep3        | -4.8 | -1.9 | -4.7 | -2   | p2m               |
| Ccr9          | -4.7 | -4.8 | -4.1 | -4.2 | p2m               |
| Atp1b1        | -4   | -4.5 | -3   | -3.5 | p2m               |
| F3            | -3.4 | 0    | -3.2 | 0    | p2m               |
| Sox4          | -3.3 | -4.7 | -4.1 | -5.3 | p2m, p0           |
| Cd24a         | -3.1 | -2.8 | -3.9 | -3.6 | p2m               |
| Acsl3         | -3.1 | -2.7 | -2.3 | -2.2 | p2m               |
| Tubb2b        | -3   | -4.2 | -2.7 | -3.6 | p2m               |
| Plaur         | -3   | -1.6 | -2.6 | -1.6 | p2m               |
| Basp1         | -2.8 | -2.9 | -2.9 | -2.8 | p2m               |
| Baz2b         | -2.7 | -2.6 | -2.5 | -2.6 | p2m, p2m, p0, p2m |
| Itm2a         | -2.6 | 0    | -2.8 | -1.8 | p2m               |
| Ldhb          | -2.4 | -2.8 | -2.7 | -2.9 | p2m               |
| Fnbp1l        | -2.1 | -1.7 | -2   | -1.9 | p2m               |
| Lipg          | -2.1 | 0    | -2.3 | 0    | p2m               |
| Lif           | -2.1 | 0    | -1.8 | 0    | p2m               |
| Ramp3         | -2   | -1.8 | -1.5 | -1.6 | p2m               |
| 9430027B09Rik | -2   | -1.3 | -1.2 | -0.9 | p2m               |
| Tcf7l2        | -2   | -2.1 | -2   | -2   | p2m, p2m, p0      |
| AI131651      | -1.9 | -2.8 | -1.8 | -2.1 | p2m               |
| Afap1         | -1.9 | -2.3 | -1.3 | -1.4 | p2m               |
| A130001G05Rik | -1.9 | -1.1 | -1.2 | 0    | p2m               |
| Cdk5r1        | -1.9 | 0    | -1.3 | 0    | p2m               |
| Igfbp4        | -1.9 | -2.4 | -1.3 | -1.3 | p2m, p0, p0       |
| Chst15        | -1.9 | 0    | -1.5 | -0.6 | p3m, p2m          |
| Myb           | -1.9 | -1.5 | -1.1 | 0    | p2m, p2m, p3m     |
| Ctse          | -1.8 | -2.9 | -2.6 | -3.8 | p2m               |
| Trat1         | -1.8 | -2.4 | -2.1 | -2.6 | p2m               |
| Cnksr3        | -1.8 | -1.8 | -1.4 | -1.5 | p2m               |
| Cap1          | -1.8 | -1.5 | -1.5 | -1.4 | p2m               |
| Ptpla         | -1.8 | -1.1 | -1.6 | -0.7 | p2m               |
| Sgip1         | -1.8 | 0    | -1.6 | 0    | p2m               |
| Timp2         | -1.8 | -2   | -1.9 | -2.2 | p2m, p0, p0       |
| P4ha2         | -1.7 | 0    | -1.8 | -0.5 | p2m               |
| Mast4         | -1.7 | 0    | -1.5 | 0    | p2m               |
| Bach1         | -1.7 | 0    | -1   | 0    | p2m               |
| Dntt          | -1.7 | -1.5 | -1.2 | -1.3 | p3m, p3m, p2m     |
| Tdrkh         | -1.6 | 0    | -1.4 | 0    | p2m               |
| Itgae         | -1.5 | -1.9 | -1.8 | -2.2 | p2m               |
| Tubb2a        | -1.5 | -2   | -1.1 | -2.2 | p2m               |
| Sfmbt2        | -1.5 | -1.4 | -1.8 | -2   | p2m               |
| Vegfa         | -1.5 | 0    | -1.1 | 0    | p2m               |

|               |      |      |      |      |                                 |
|---------------|------|------|------|------|---------------------------------|
| 4930426L09Rik | -1.5 | 0    | -1   | 0    | p2m                             |
| lkzf2         | -1.5 | -3.2 | -2   | -3.8 | p6m, p2m, p0                    |
| Zdhhc14       | -1.4 | -1.7 | -1.1 | -1.7 | p2m                             |
| Ramp1         | -1.4 | -1.8 | -1.3 | -1.6 | p2m                             |
| Gsn           | -1.4 | -1.5 | -1   | -1.3 | p2m                             |
| BB163080      | -1.4 | -2.7 | -0.9 | -1.2 | p2m                             |
| Uqcrq         | -1.4 | 0    | -1.2 | 0    | p2m                             |
| Rorc          | -1.4 | 0    | -1.3 | 0    | p2m                             |
| Tnfrsf19      | -1.4 | 0    | -1.3 | 0    | p2m                             |
| Dusp16        | -1.3 | -1.3 | -1.7 | -1.2 | p2m                             |
| C230085N15Rik | -1.3 | -1.4 | -1.3 | -1   | p2m                             |
| Ets2          | -1.3 | 0    | -1.3 | -0.7 | p2m                             |
| 2700079J08Rik | -1.3 | 0    | -0.9 | -0.6 | p2m                             |
| Srpk2         | -1.3 | 0    | -1.1 | -0.6 | p2m                             |
| Atxn10        | -1.3 | 0    | -1   | 0    | p2m                             |
| Papss2        | -1.3 | 0    | -1.3 | 0    | p2m                             |
| Tmcc3         | -1.3 | 0    | -1.4 | 0    | p2m                             |
| Leap2         | -1.3 | 0    | -1.2 | 0    | p2m                             |
| Irak3         | -1.3 | 0    | -1.1 | 0    | p2m                             |
| Satb1         | -1.3 | -1.3 | -1.3 | -0.9 | p3m, p0, p2m, p2m, p2m          |
| Tox           | -1.2 | -1.6 | -1.5 | -1.4 | p2m                             |
| Frat2         | -1.2 | 0    | -1.1 | 0    | p2m                             |
| Lbh           | -1.2 | 0    | -1.1 | 0    | p2m                             |
| Cd5           | -1.2 | 0    | -1   | 0    | p2m                             |
| Tmlhe         | -1.2 | -2.6 | -0.7 | -1.7 | p2m, p0, p0, p0                 |
| lfngr2        | -1.1 | -2.8 | -1.2 | -2.3 | p2m                             |
| Gtf2ird1      | -1.1 | -1.1 | -1   | -1   | p2m                             |
| Aldh2         | -1.1 | -1.2 | -1.2 | -0.8 | p2m                             |
| E430014B02Rik | -1.1 | -1.2 | -1.2 | -0.8 | p2m                             |
| Tmem69        | -1.1 | 0    | -1   | -0.8 | p2m                             |
| Skap1         | -1.1 | 0    | -1   | -0.6 | p2m                             |
| Zcchc12       | -1.1 | 0    | -1   | -0.5 | p2m                             |
| A930002I21Rik | -1.1 | 0    | -0.9 | -0.4 | p2m                             |
| D130062J21Rik | -1.1 | 0    | -0.6 | 0    | p2m                             |
| P2rx4         | -1.1 | 0    | -0.7 | 0    | p2m                             |
| Aldh1b1       | -1.1 | 0    | -0.8 | 0    | p2m                             |
| Kbtbd7        | -1.1 | 1.1  | -1.2 | 0    | p2m                             |
| 5730419I09Rik | -1.1 | 0    | -1.4 | 0    | p2m                             |
| Pex5          | -1.1 | 0    | -1.2 | 0    | p2m                             |
| Slc16a10      | -1.1 | 0    | -1.1 | 0    | p2m                             |
| Etnk1         | -1.1 | 0    | -1   | 0    | p2m                             |
| Mmd           | -1.1 | 0    | -0.8 | 0    | p2m                             |
| Tacc2         | -1.1 | 0    | -0.8 | 0    | p2m                             |
| Pdss1         | -1.1 | 0    | -0.7 | 0    | p2m                             |
| Cnn3          | -1.1 | 0    | -0.7 | -0.6 | p3m, p3m, p3m, p3m, p3m,<br>p2m |
| Slc43a2       | -1.1 | -1.5 | -0.7 | -0.6 | p2m, p0, p0                     |
| Ankrd28       | -1.1 | 0    | -1   | 0    | p2m, p0                         |
| Prnp          | -1.1 | 0    | -1.5 | 0    | p6m, p2m                        |
| Trim13        | -1   | 0    | -1   | -1.3 | p2m                             |
| Ggta1         | -1   | -1   | -1.5 | -1.2 | p2m                             |
| Scmh1         | -1   | 0    | -0.8 | -0.6 | p2m                             |
| Hectd2        | -1   | 0    | -0.8 | -0.7 | p0, p2m                         |

**SUPPLEMENTARY TABLE S8.** Genes with a fold change of at least 2 in the FLU-TM to Naive comparison and belonging to one of the six following profiles RP3 are shown. FC for the TIM to naive comparison are given. If the gene was found in the meta-analysis (tables S9, 10 and 11) its rank is given. For certain genes multiple probe sets are present on the Affymetrix microarrays. The profile for each probe set is given.

| RP3 - Upregulated gene |      |      |      |      |                |
|------------------------|------|------|------|------|----------------|
| Gene                   | FluR | FluH | TimR | TimH | Classe profils |
| Klrc1                  | 8.4  | 9.5  | 6.1  | 6.3  | p3             |
| Plek                   | 7.1  | 5.2  | 4.9  | 1.4  | p3             |
| Cd44                   | 6.9  | 7.2  | 5    | 4.4  | p3             |
| Ccl5                   | 6.6  | 7.3  | 4.6  | 5.6  | p3             |
| S100a6                 | 6.2  | 6.4  | 4.7  | 5.6  | p3             |
| Ccr5                   | 5.6  | 3.7  | 3.7  | 1.3  | p3             |
| Klrc1                  | 5.5  | 5.7  | 3.9  | 4.2  | p3             |
| Itgax                  | 5.3  | 4    | 2.9  | 2.2  | p3             |
| Klrc2                  | 5.2  | 6.1  | 2.5  | 2.9  | p3             |
| Il18rap                | 4.8  | 3.6  | 3.2  | 2.3  | p3             |
| Gzmk                   | 4.7  | 6.1  | 0.9  | 1.6  | p3             |
| Il18r1                 | 4.5  | 2.7  | 2.9  | 1.4  | p3             |
| Eomes                  | 4.5  | 5    | 1.6  | 1.6  | p3             |
| Mdfic                  | 4.5  | 4.7  | 3.5  | 2.5  | p3             |
| Havcr2                 | 4.3  | 2    | 2.5  | 0    | p3             |
| Plscr1                 | 4    | 3.8  | 2.8  | 2.5  | p3             |
| Gzmb                   | 4    | 4.1  | 2.3  | 2.1  | p3             |
| Runx2                  | 3.9  | 5.4  | 2    | 2.6  | p3             |
| Nt5e                   | 3.8  | 4.6  | 1.6  | 2    | p3             |
| Sv2c                   | 3.7  | 1.6  | 1    | 0    | p3             |
| Ptger2                 | 3.7  | 2.7  | 2.3  | 0    | p3             |
| Serpinb6b              | 3.6  | 2.1  | 2.7  | 0.9  | p3             |
| Gbp3                   | 3.5  | 2.7  | 1.6  | 0.9  | p3             |
| Klrc3                  | 3.5  | 4.9  | 1    | 1.9  | p3             |
| Bhlhe40                | 3.4  | 3.7  | 1.1  | 1.4  | p3             |
| Casp1                  | 3.4  | 4.4  | 1.7  | 2.1  | p3             |
| Rgs16                  | 3.4  | 3.5  | 2.1  | 0    | p3             |
| Nfil3                  | 3.3  | 2    | 2.3  | 0.9  | p3             |
| Casp4                  | 3.3  | 4.2  | 1.6  | 2.1  | p3             |
| Serpinb9               | 3.2  | 2.5  | 2.3  | 0    | p3             |
| Spin4                  | 3.1  | 0    | 1.6  | 0    | p3             |
| Gzma                   | 3    | 2.7  | 1.7  | 1.2  | p3             |
| Vim                    | 2.9  | 1.9  | 1.4  | 0    | p3             |
| Zbtb1                  | 2.8  | 0    | 1.4  | 0    | p3             |
| Il1r1                  | 2.8  | 0    | 1.1  | 0    | p3             |
| D330040H18Rik          | 2.8  | 0    | 1.6  | 0    | p3             |
| 6330509M05Rik          | 2.7  | 2.7  | 1.2  | 1.5  | p3             |
| Atxn711                | 2.6  | 1.5  | 1.7  | 0.6  | p3             |
| Cxcr6                  | 2.6  | 3.4  | 1.1  | 0.9  | p3             |
| Serpinb6a              | 2.6  | 2.7  | 1.4  | 1.4  | p3             |
| Ctla2b                 | 2.6  | 3.3  | 1.7  | 1.8  | p3             |
| Plac8                  | 2.6  | 3    | 1.7  | 2.1  | p3             |
| AA467197               | 2.6  | 2.6  | 0.7  | 0    | p3             |
| Chst11                 | 2.4  | 2    | 1    | 1    | p3             |
| Anxa2                  | 2.4  | 2.5  | 1.2  | 1.3  | p3             |
| Adam19                 | 2.4  | 2.6  | 1.7  | 2.2  | p3             |
| Eil2                   | 2.4  | 4.3  | 1.2  | 2.5  | p3             |
| Srxn1                  | 2.4  | 0    | 1.3  | 0    | p3             |
| Zbtb32                 | 2.4  | 0    | 1.1  | 0    | p3             |
| LOC641050              | 2.3  | 1.3  | 1.2  | 1.1  | p3             |
| Fam129a                | 2.3  | 2.9  | 1.4  | 1.5  | p3             |
| Ctla2a                 | 2.3  | 2.6  | 1.4  | 1.7  | p3             |
| Rgs1                   | 2.3  | 3.9  | 1.4  | 2    | p3             |
| Camk2n1                | 2.3  | 3.1  | 1.6  | 2.2  | p3             |
| Ifih1                  | 2.3  | 0    | 0.8  | 0    | p3             |

|               |     |     |     |     |                            |
|---------------|-----|-----|-----|-----|----------------------------|
| Kcnk5         | 2.2 | 2.3 | 0.8 | 0.5 | p3                         |
| Smyd1         | 2.2 | 1.2 | 0.9 | 0.9 | p3                         |
| Cd47          | 2.2 | 1.5 | 1.2 | 0.6 | p3                         |
| Nkg7          | 2.2 | 2.2 | 1   | 1   | p3                         |
| Atxn1         | 2.2 | 1.6 | 1.3 | 1.2 | p3                         |
| Rnf157        | 2.2 | 1.9 | 1.1 | 0   | p3                         |
| 4930486L24Rik | 2.1 | 2   | 1.2 | 0.8 | p3                         |
| 2010111101Rik | 2.1 | 1.5 | 1.2 | 0.9 | p3                         |
| Aim1          | 2.1 | 2   | 1   | 0   | p3                         |
| Ddx43         | 2   | 1.9 | 1   | 0.7 | p3                         |
| Fam46c        | 2   | 0   | 0.9 | 0.9 | p3                         |
| Atf6          | 2   | 2.4 | 1.1 | 1.6 | p3                         |
| H2-Q10        | 2   | 2   | 1   | 1.1 | p3                         |
| Lgals1        | 2   | 2.1 | 1.1 | 1.4 | p3                         |
| Hopx          | 2   | 3   | 1.4 | 2.1 | p3                         |
| Il10ra        | 2   | 1.8 | 1   | 0   | p3                         |
| Usp18         | 1.9 | 2.1 | 1   | 0.9 | p3                         |
| Tmbim1        | 1.9 | 1.5 | 0.9 | 0   | p3                         |
| Ifi203        | 1.8 | 1.8 | 1.1 | 0.7 | p3                         |
| Acot7         | 1.8 | 2   | 1   | 1.1 | p3                         |
| Crot          | 1.8 | 0   | 0.9 | 0   | p3                         |
| Elk3          | 1.8 | 1.2 | 0.8 | 0   | p3                         |
| Rbpj          | 1.7 | 1.5 | 0.7 | 0   | p3                         |
| Dusp14        | 1.7 | 0   | 0.6 | 0   | p3                         |
| 4933415E08Rik | 1.7 | 0   | 0.8 | 0   | p3                         |
| Ifit3         | 1.6 | 2.4 | 0.8 | 1.1 | p3                         |
| 3110037C07Rik | 1.6 | 0   | 0.5 | 0   | p3                         |
| Al120166      | 1.6 | 0   | 0.9 | 0   | p3                         |
| Zbtb25        | 1.6 | 0   | 0.9 | 0   | p3                         |
| Cd52          | 1.5 | 1   | 0.8 | 0.8 | p3                         |
| Tnfrsf18      | 1.5 | 1.1 | 0.7 | 0   | p3                         |
| Arhgap26      | 1.4 | 1.6 | 0.5 | 0.7 | p3                         |
| Atp10a        | 1.4 | 1.1 | 0.7 | 0   | p3                         |
| Sytl3         | 1.4 | 1.6 | 0.7 | 0   | p3                         |
| 4930431P03Rik | 1.4 | 0   | 0.6 | 0   | p3                         |
| A430103D13Rik | 1.4 | 0   | 0.8 | 0   | p3                         |
| Nckap1        | 1.3 | 0   | 0.8 | 0.5 | p3                         |
| Jdp2          | 1.3 | 1.8 | 0.8 | 0.6 | p3                         |
| Slc39a4       | 1.3 | 1.5 | 0.7 | 0.9 | p3                         |
| Kbtbd11       | 1.2 | 1.1 | 0.8 | 0.8 | p3                         |
| Nfe2l2        | 1.2 | 0   | 0.6 | 0   | p3                         |
| Nfatc3        | 1.2 | 0   | 0.6 | 0   | p3                         |
| Cd2           | 1.1 | 1.1 | 0.7 | 0.4 | p3                         |
| Ksr1          | 1.1 | 1   | 0.6 | 0.6 | p3                         |
| Grina         | 1   | 0   | 0.5 | 0.7 | p3                         |
| Osbpl3        | 4.3 | 3   | 0.9 | 0   | p1. p3                     |
| Mpzl2         | 3.7 | 0   | 0.9 | 0   | p3. p1. p1                 |
| BC016495      | 3.6 | 2.3 | 2.8 | 1.1 | p3. p3. p2                 |
| Zeb2          | 3.5 | 1.1 | 1.4 | 0   | p3. p1. p1. p1             |
| Cpd           | 3.4 | 4.7 | 1.6 | 2.4 | p3. p3. p3. p1. p0. p1. p3 |
| Ptprj         | 3.4 | 2.2 | 0.9 | 0   | p1. p1. p1. p3             |
| Ttc39c        | 3.2 | 3.1 | 0.9 | 0   | p1. p1. p3                 |
| Cobll1        | 3.1 | 4.3 | 1.7 | 2   | p3. p0                     |
| Alcam         | 2.8 | 1.8 | 1.5 | 0.7 | p3. p3. p2. p3. p2         |
| Cd86          | 2.8 | 2.6 | 1.5 | 1.3 | p3. p1                     |
| Ahnak         | 2.7 | 3.2 | 1.4 | 1.9 | p1. p3                     |
| Nrp1          | 2.6 | 3.4 | 1.5 | 2.6 | p3. p3. p0. p3             |
| Socs3         | 2.6 | 0   | 0.7 | 0   | p3. p1. p1                 |
| Il7r          | 2.6 | 0   | 1.5 | 0   | p3. p2                     |
| Itgav         | 2.6 | 1.7 | 1.4 | 0   | p3. p3. p1                 |
| Myo1f         | 2.5 | 3.2 | 0.9 | 1.8 | p1. p3                     |
| Itgb1         | 2.3 | 3   | 1.2 | 1.2 | p3. p3. p0                 |
| Golim4        | 2.3 | 2.8 | 1.2 | 1.4 | p3. p1                     |
| St3gal6       | 2.2 | 3.2 | 1.3 | 1.5 | p2. p3                     |



|               |     |     |     |     |                        |
|---------------|-----|-----|-----|-----|------------------------|
| Hnrpll        | 2.2 | 0   | 1.3 | 0   | p2. p3                 |
| Arsb          | 2   | 1.1 | 1.2 | 0.8 | p3. p1                 |
| Endod1        | 2   | 3.8 | 1   | 2.7 | p0. p0. p3. p0         |
| Abcb1a        | 2   | 2.2 | 0.9 | 0   | p1. p3                 |
| Bcl2l1        | 1.9 | 1.2 | 0.8 | 0   | p3. p3. p1. p1         |
| Slco3a1       | 1.9 | 1.3 | 0.8 | 0   | p3. p1. p3             |
| Nfat5         | 1.8 | 1.1 | 1.2 | 0.8 | p2. p3. p2. p3. p3. p2 |
| Odc1          | 1.7 | 2.7 | 1.1 | 1.7 | p0. p3. p3             |
| Cd8a          | 1.6 | 1   | 1.1 | 0.6 | p3. p2. p2. p2         |
| Oxsm          | 1.6 | 0   | 0.9 | 0   | p3. p3. p2             |
| B4galt5       | 1.5 | 1.2 | 0.9 | 0.6 | p3. p0                 |
| Racgap1       | 1.5 | 1.8 | 0.7 | 0.8 | p0. p3                 |
| Abi2          | 1.4 | 1.5 | 0.6 | 0.7 | p3. p1                 |
| Spata13       | 1.4 | 0   | 0.7 | 0   | p3. p2                 |
| Themis        | 1.4 | 0   | 0.5 | 0   | p3. p1                 |
| Smad3         | 1.3 | 1.2 | 0.4 | 0.4 | p3. p0                 |
| Enpp1         | 1.3 | 0   | 0.6 | 0   | p2. p3                 |
| Csda          | 1.2 | 1.4 | 0.8 | 0.9 | p3. p2                 |
| Pde7a         | 1.2 | 0   | 0.6 | 0   | p3. p3. p1. p3         |
| Adora2a       | 1.2 | 0   | 0.6 | 0   | p2. p3                 |
| Rnf19b        | 1.1 | 1.3 | 0.5 | 0.8 | p3. p1                 |
| 4930523C07Rik | 1   | 0   | 0.5 | 0   | p1. p3. p0. p1         |

RP3 - downregulated

| Gene          | FluR | FluH | TimR | TimH | Classe profils           |
|---------------|------|------|------|------|--------------------------|
| Xkrx          | -3.6 | -1.9 | -2.9 | -1.8 | p3m                      |
| Cyp11a1       | -3.3 | 0    | -1.3 | 0    | p3m                      |
| 4930520K10Rik | -3.1 | -1.2 | -1.9 | 0    | p3m                      |
| Utp14b        | -3   | -1.7 | -2   | -1.6 | p3m                      |
| 2010007H06Rik | -2.2 | 0    | -1.2 | 0    | p3m                      |
| Ephx1         | -2.1 | -2.3 | -1.3 | -1.3 | p3m                      |
| Igf1r         | -2.1 | -2.8 | -1.2 | -1.1 | p3m                      |
| Akap2         | -1.8 | 0    | -1.2 | -1.1 | p3m                      |
| Bambi-ps1     | -1.6 | -3.8 | -0.7 | -1   | p3m                      |
| Sh3bp2        | -1.6 | 0    | -0.8 | 0    | p3m                      |
| Bend4         | -1.5 | -1.1 | -0.8 | -0.9 | p3m                      |
| Rgs10         | -1.5 | 0    | -0.7 | 0    | p3m                      |
| Sft2d2        | -1.2 | 0    | -0.6 | 0    | p3m                      |
| Map4k4        | -1.2 | 0    | -0.8 | 0    | p3m                      |
| Pycr1         | -1.2 | 0    | -0.6 | 0    | p3m                      |
| Rabggta       | -1.1 | 0    | -0.5 | 0    | p3m                      |
| Tmem108       | -1   | 0    | -0.5 | -0.5 | p3m                      |
| Ldlr          | -1   | 0    | -0.5 | 0    | p3m                      |
| Ece2          | -1   | 0    | -0.5 | 0    | p3m                      |
| Cnn3          | -4.1 | -4.6 | -2.7 | -3.5 | p3m. p3m. p3m. p3m. p3m. |
| Dntt          | -3.9 | -4.2 | -3.1 | -3.4 | p2m                      |
| Chst15        | -3   | -2.1 | -1.9 | -1.5 | p3m. p3m. p2m            |
| Myb           | -1.9 | -1.3 | -1   | 0    | p3m. p2m                 |
| Evi2a         | -1.7 | 0    | -0.9 | 0    | p2m. p2m. p3m            |
| Osbpl9        | -1.4 | 0    | -0.4 | 0    | p3m. p1m                 |
| Satb1         | -1.3 | -1.1 | -0.8 | 0    | p1m. p3m. p0             |
| Fam134b       | -1.3 | -1.2 | -0.6 | -1   | p3m. p0. p2m. p2m. p2m   |
|               |      |      |      | -0.7 | p1m. p3m                 |

**SUPPLEMENTARY TABLE S9.** Meta-analysis was performed using the RankProd on 8 datasets comparing the gene expression signature of memory CD8 T cells compared to naive CD8 T cells in homeostatic conditions. \* Fisher enrichment test p-values of discretized profiles (columns) in the differential expression gene lists (Memory versus naive comparison) from studies considered for the Rankprod meta-analysis (rows).

| List Name | Pathogen         | TCR Transgenic | Time post priming | Reference         | GSE file | HP2*      | HP3*      |
|-----------|------------------|----------------|-------------------|-------------------|----------|-----------|-----------|
| VVP1      | Vaccinia-NP68    | F5             | 48-56             | Platine1          | GSE70763 | 1,36E-164 | 2,67E-167 |
| LP2       | Listeria-NP68    | F5             | 48-54             | Platine2          | GSE86601 | 1,54E-90  | 9,19E-114 |
| LImm1     | Listeria-Ova     | OT1            | 45                | ImmGen            | GSE15907 | 1,03E-35  | 2,03E-79  |
| LImm2     | Listeria-Ova     | OT1            | 100               | ImmGen            | GSE15907 | 1,78E-33  | 6,83E-71  |
| LW        | att-Listeria-Ova | OT1            | 85-95             | Wirth et al 2011  | GSE21360 | 7,94E-59  | 5,27E-96  |
| VSVImm1   | VSV              | OT1            | 45                | ImmGen            | GSE15907 | 7,33E-30  | 3,03E-63  |
| VSVImm2   | VSV              | OT1            | 106               | ImmGen            | GSE15907 | 5,15E-05  | 2,49E-17  |
| LCMV      | LCMV             | P14            | 60-120            | Sarkar et al 2008 | GSE10239 | 3,07E-19  | 3,51E-26  |

**SUPPLEMENTARY TABLE S10.** List of up-regulated genes with their ranking in the meta-analysis performed as described in the Methods. The first column is giving the gene rank according to the gene rank product (the largest FC across studies are associated with the smallest Rank Product). The last column is the average expression levels under two conditions (Memory and Naive) given as a log2 fold change. List of up-regulated genes with their ranking in the meta-analysis performed as described in the methods.

| Rank | Name          | Description                                                  | log2FC(Mem vs Na) |
|------|---------------|--------------------------------------------------------------|-------------------|
| 1    | Klrc1         | killer cell lectin-like receptor subfamily C. member 1       | 5.92              |
| 2    | Ccl5          | chemokine (C-C motif) ligand 5                               | 5.21              |
| 3    | S100a6        | S100 calcium binding protein A6 (calcyclin)                  | 5.01              |
| 4    | Cxcr3         | chemokine (C-X-C motif) receptor 3                           | 3.93              |
| 5    | Ifng          | interferon gamma                                             | 3.83              |
| 6    | Plek          | pleckstrin                                                   | 3.95              |
| 7    | Ccr5          | chemokine (C-C motif) receptor 5                             | 3.84              |
| 8    | Itgax         | integrin alpha X                                             | 3.7               |
| 9    | Klrc1         | killer cell lectin-like receptor subfamily K. member 1       | 3.8               |
| 10   | Fasl          | Fas ligand (TNF superfamily. member 6)                       | 3.5               |
| 11   | Cd44          | CD44 antigen                                                 | 3.33              |
| 12   | Il18rap       | interleukin 18 receptor accessory protein                    | 3.56              |
| 13   | Klrc2         | killer cell lectin-like receptor subfamily C. member 2       | 3.54              |
| 14   | Tbx21         | T-box 21                                                     | 3.52              |
| 15   | S100a4        | S100 calcium binding protein A4                              | 3.23              |
| 16   | Gzmk          | granzyme K                                                   | 3.04              |
| 17   | Kcnj8         | potassium inwardly-rectifying channel. subfamily J. member 8 | 2.96              |
| 18   | Casp1         | caspase 1                                                    | 2.83              |
| 19   | Id2           | inhibitor of DNA binding 2                                   | 3.09              |
| 20   | Runx2         | runt related transcription factor 2                          | 2.79              |
| 21   | Gzmb          | granzyme B                                                   | 2.93              |
| 22   | Ccr2          | chemokine (C-C motif) receptor 2                             | 3.16              |
| 23   | Bhlhe40       | basic helix-loop-helix family. member e40                    | 2.77              |
| 24   | Nt5e          | 5' nucleotidase. ecto                                        | 2.77              |
| 25   | Slamf7        | SLAM family member 7                                         | 3.04              |
| 26   | Anxa1         | annexin A1                                                   | 2.99              |
| 27   | Ctla2a        | cytotoxic T lymphocyte-associated protein 2 alpha            | 2.83              |
| 28   | Klrg1         | killer cell lectin-like receptor subfamily G. member 1       | 2.62              |
| 29   | Ctla2b        | cytotoxic T lymphocyte-associated protein 2 beta             | 2.5               |
| 30   | Ttc39c        | tetratricopeptide repeat domain 39C                          | 2.52              |
| 31   | Hopx          | HOP homeobox                                                 | 2.28              |
| 32   | Dmrta1        | doublesex and mab-3 related transcription factor like family | 2.33              |
| 33   | 5430427O19Rik | RIKEN cDNA 5430427O19 gene                                   | 2.16              |
| 34   | Itgb1         | integrin beta 1 (fibronectin receptor beta)                  | 2.86              |
| 35   | Casp4         | caspase 4. apoptosis-related cysteine peptidase              | 2.04              |
| 36   | Myo1f         | myosin IF                                                    | 2.38              |
| 37   | Ccl3          | chemokine (C-C motif) ligand 3                               | 2.43              |
| 38   | Klrc3         | killer cell lectin-like receptor subfamily C. member 3       | 2.37              |
| 39   | Rgs1          | regulator of G-protein signaling 1                           | 2.13              |
| 40   | Ahnak         | AHNAK nucleoprotein (desmoyokin)                             | 2.29              |
| 41   | Fcgr2b        | Fc receptor. IgG. low affinity IIb                           | 2.53              |
| 42   | Eomes         | eomesodermin homolog ( <i>Xenopus laevis</i> )               | 1.82              |
| 43   | Cobll1        | Cobl-like 1                                                  | 2.05              |
| 44   | Ptpnj         | protein tyrosine phosphatase. receptor type. J               | 2.49              |
| 45   | Cxcr6         | chemokine (C-X-C motif) receptor 6                           | 1.97              |
| 46   | Smpdl3b       | sphingomyelin phosphodiesterase. acid-like 3B                | 2.25              |
| 47   | Camk2n1       | calcium/calmodulin-dependent protein kinase II inhibitor 1   | 1.95              |

|     |               |                                                              |      |
|-----|---------------|--------------------------------------------------------------|------|
| 48  | Osbpl3        | oxysterol binding protein-like 3                             | 2.51 |
| 49  | Il18r1        | interleukin 18 receptor 1                                    | 2.22 |
| 50  | Nrp1          | neuropilin 1                                                 | 2.41 |
| 51  | Anxa2         | annexin A2                                                   | 2.15 |
| 52  | Kcnk5         | potassium channel. subfamily K. member 5                     | 2.15 |
| 53  | Zeb2          | zinc finger E-box binding homeobox 2                         | 2.11 |
| 54  | Il2ra         | interleukin 2 receptor. alpha chain                          | 1.82 |
| 55  | Zdhhc2        | zinc finger. DHHC domain containing 2                        | 2.02 |
| 56  | Gnptab        | N-acetylglucosamine-1-phosphate transferase. alpha and beta  | 1.8  |
| 57  | Cdh1          | cadherin 1                                                   | 1.78 |
| 58  | St3gal6       | ST3 beta-galactoside alpha-2.3-sialyltransferase 6           | 1.83 |
| 59  | Lgals1        | lectin. galactose binding. soluble 1                         | 2.12 |
| 60  | Yes1          | Yamaguchi sarcoma viral (v-yes) oncogene homolog 1           | 1.65 |
| 61  | Fam129a       | family with sequence similarity 129. member A                | 2.03 |
| 62  | Itga1         | integrin alpha 1                                             | 2.32 |
| 63  | Gzmm          | granzyme M (lymphocyte met-ase 1)                            | 1.79 |
| 64  | H2-Q10        | histocompatibility 2. Q region locus 10                      | 1.7  |
| 65  | Ttc39b        | tetratricopeptide repeat domain 39B                          | 1.7  |
| 66  | 1700025G04Rik | RIKEN cDNA 1700025G04 gene                                   | 1.91 |
| 67  | Car5b         | carbonic anhydrase 5b. mitochondrial                         | 2.03 |
| 68  | Chsy1         | chondroitin sulfate synthase 1                               | 1.71 |
| 69  | Xcl1          | chemokine (C motif) ligand 1                                 | 1.55 |
| 70  | Entpd1        | ectonucleoside triphosphate diphosphohydrolase 1             | 1.72 |
| 71  | Endod1        | endonuclease domain containing 1                             | 1.68 |
| 72  | Chst11        | carbohydrate sulfotransferase 11                             | 1.56 |
| 73  | Mdfic         | MyoD family inhibitor domain containing                      | 1.79 |
| 74  | Ppm1j         | protein phosphatase 1J                                       | 1.62 |
| 75  | Il12rb2       | interleukin 12 receptor. beta 2                              | 1.64 |
| 76  | Ccl4          | chemokine (C-C motif) ligand 4                               | 1.71 |
| 77  | Ell2          | elongation factor RNA polymerase II 2                        | 1.43 |
| 78  | Tnfrsf14      | tumor necrosis factor (ligand) superfamily. member 14        | 1.56 |
| 79  | Asns          | asparagine synthetase                                        | 1.47 |
| 80  | Adam19        | a disintegrin and metallopeptidase domain 19 (meltrin beta)  | 1.44 |
| 81  | Syt12         | synaptotagmin-like 2                                         | 1.55 |
| 82  | S1pr5         | sphingosine-1-phosphate receptor 5                           | 2.04 |
| 83  | Lrrk1         | RIKEN cDNA 5730590G19 gene                                   | 1.81 |
| 84  | Nrarp         | Notch-regulated ankyrin repeat protein                       | 1.5  |
| 85  | Atf6          | activating transcription factor 6                            | 1.49 |
| 86  | Pglyrp1       | peptidoglycan recognition protein 1                          | 1.56 |
| 87  | Crtam         | cytotoxic and regulatory T cell molecule                     | 1.45 |
| 88  | Ly6a          | lymphocyte antigen 6 complex. locus A                        | 1.31 |
| 89  | Sdcbp2        | trafficking protein particle complex 4                       | 1.43 |
| 90  | Acot7         | acyl-CoA thioesterase 7                                      | 1.41 |
| 91  | Ccdc50        | coiled-coil domain containing 50                             | 1.31 |
| 92  | Klrb1c        | killer cell lectin-like receptor subfamily B member 1C       | 2.3  |
| 93  | F2r           | coagulation factor II (thrombin) receptor                    | 1.4  |
| 94  | Aqp9          | aquaporin 9                                                  | 1.66 |
| 95  | Dennd5a       | DENN/MADD domain containing 5A                               | 1.36 |
| 96  | Soat2         | sterol O-acyltransferase 2                                   | 1.5  |
| 97  | 5830416P10Rik | RIKEN cDNA 5830416P10 gene                                   | 1.33 |
| 98  | Il10ra        | interleukin 10 receptor. alpha                               | 1.49 |
| 99  | Gata3         | GATA binding protein 3                                       | 1.27 |
| 100 | Pogk          | pogo transposable element with KRAB domain                   | 1.53 |
| 101 | Gzma          | granzyme A                                                   | 1.34 |
| 102 | Slc25a24      | solute carrier family 25 (mitochondrial carrier. phosphate c | 1.54 |

|     |          |                                                              |      |
|-----|----------|--------------------------------------------------------------|------|
| 103 | Rora     | RAR-related orphan receptor alpha                            | 1.42 |
| 104 | Pion     | pigeon homolog (Drosophila)                                  | 1.38 |
| 105 | Plscr1   | phospholipid scramblase 1                                    | 1.4  |
| 106 | Itpril2  | inositol 1.4.5-triphosphate receptor interacting protein-lik | 1.18 |
| 107 | Il2rb    | interleukin 2 receptor. beta chain                           | 1.58 |
| 108 | Mapre2   | microtubule-associated protein. RP/EB family. member 2       | 1.71 |
| 109 | Dock5    | dedicator of cytokinesis 5                                   | 1.42 |
| 110 | Gng2     | guanine nucleotide binding protein (G protein). gamma 2      | 1.29 |
| 111 | Gpr183   | G protein-coupled receptor 183                               | 1.18 |
| 112 | Arhgap26 | Rho GTPase activating protein 26                             | 1.43 |
| 113 | Pik3ap1  | phosphoinositide-3-kinase adaptor protein 1                  | 1.84 |
| 114 | Serpinb9 | serine (or cysteine) peptidase inhibitor. clade B. member 9  | 1.1  |
| 115 | N4bp1    | NEDD4 binding protein 1                                      | 1.2  |
| 116 | Kcnk6    | potassium channel. subfamily K. member 7                     | 1.21 |
| 117 | Ms4a6d   | membrane-spanning 4-domains. subfamily A. member 6D          | 1.2  |
| 118 | Antxr2   | anthrax toxin receptor 2                                     | 1.1  |
| 119 | Csda     | cold shock domain protein A                                  | 1.19 |
| 120 | Fgf13    | fibroblast growth factor 13                                  | 1.22 |
| 121 | Fgl2     | fibrinogen-like protein 2                                    | 1.37 |
| 122 | Lancl3   | LanC lantibiotic synthetase component C-like 3 (bacterial)   | 1.17 |
| 123 | AA467197 | expressed sequence AA467197                                  | 1.22 |
| 124 | Efhd2    | EF hand domain containing 2                                  | 1.35 |
| 125 | Dkk1     | dickkopf-like 1                                              | 1.37 |
| 126 | Prss12   | protease. serine. 12 neurotrypsin (motopsin)                 | 1.26 |
| 127 | Bcl2l1   | BCL2-like 1                                                  | 1.11 |
| 128 | Capn2    | calpain 2                                                    | 1.2  |
| 129 | Ier3     | immediate early response 3                                   | 1.19 |
| 130 | Ern1     | endoplasmic reticulum (ER) to nucleus signalling 2           | 1.12 |
| 131 | Tspan31  | tetraspanin 31                                               | 1.18 |
| 132 | Tmem154  | transmembrane protein 154                                    | 1.22 |
| 133 | Wfikkn2  | WAP. follistatin/kazal. immunoglobulin. kunitz and netrin do | 1.22 |
| 134 | Aim1     | absent in melanoma 1                                         | 1.11 |
| 135 | Arl4d    | ADP-ribosylation factor-like 4D                              | 1.22 |
| 136 | Gab3     | growth factor receptor bound protein 2-associated protein 3  | 1.09 |
| 137 | Dock9    | dedicator of cytokinesis 9                                   | 1.1  |
| 138 | Ms4a4c   | membrane-spanning 4-domains. subfamily A. member 4C          | 0.79 |
| 139 | Abcb1a   | ATP-binding cassette. sub-family B (MDR/TAP). member 1A      | 1.06 |
| 140 | Cst7     | cystatin F (leukocystatin)                                   | 1.06 |
| 141 | Tmem2    | transmembrane protein 2                                      | 1.08 |
| 142 | Cx3cr1   | chemokine (C-X3-C) receptor 1                                | 1.86 |
| 143 | Nkg7     | natural killer cell group 7 sequence                         | 1.03 |
| 144 | Hs3st3b1 | heparan sulfate (glucosamine) 3-O-sulfotransferase 3B1       | 1.06 |
| 145 | Tnfrsf1b | tumor necrosis factor receptor superfamily. member 1b        | 1.05 |
| 146 | Adora2a  | adenosine A2a receptor                                       | 1.14 |
| 147 | Acsbg1   | acyl-CoA synthetase bubblegum family member 1                | 1.05 |
| 148 | Raph1    | Ras association (RalGDS/AF-6) and pleckstrin homology domain | 1.08 |
| 149 | Atxn7l1  | ataxin 7-like 1                                              | 1.11 |
| 150 | Cdc42ep3 | CDC42 effector protein (Rho GTPase binding) 3                | 1.18 |
| 151 | Hip1     | huntingtin interacting protein 1                             | 1.06 |
| 152 | Prdm1    | PR domain containing 1. with ZNF domain                      | 1.16 |
| 153 | Prkar2a  | protein kinase. cAMP dependent regulatory. type II alpha     | 0.97 |
| 154 | Itga4    | integrin alpha 4                                             | 1.36 |
| 155 | Zyx      | zyxin                                                        | 1.14 |
| 156 | Baiap3   | BAI1-associated protein 3                                    | 1.16 |
| 157 | Atp2b4   | ATPase. Ca++ transporting. plasma membrane 4                 | 1.25 |

|     |               |                                                              |      |
|-----|---------------|--------------------------------------------------------------|------|
| 158 | Rnf138        | ring finger protein 138                                      | 0.95 |
| 159 | Cish          | cytokine inducible SH2-containing protein                    | 1.04 |
| 160 | Gna15         | guanine nucleotide binding protein. alpha 15                 | 1.4  |
| 161 | Alcam         | activated leukocyte cell adhesion molecule                   | 1.01 |
| 162 | Golim4        | golgi integral membrane protein 4                            | 0.89 |
| 163 | Gimap7        | GTPase. IMAP family member 7                                 | 0.92 |
| 164 | Arsb          | arylsulfatase B                                              | 0.99 |
| 165 | Gpr160        | G protein-coupled receptor 160                               | 1.04 |
| 166 | Smad3         | MAD homolog 3 (Drosophila)                                   | 1.26 |
| 167 | Lax1          | lymphocyte transmembrane adaptor 1                           | 0.94 |
| 168 | Gbp3          | guanylate binding protein 3                                  | 0.82 |
| 169 | Coro2a        | coronin. actin binding protein 2A                            | 0.99 |
| 170 | Cldn12        | claudin 12                                                   | 0.89 |
| 171 | Ptpn13        | protein tyrosine phosphatase. non-receptor type 13           | 1    |
| 172 | Gramd1b       | GRAM domain containing 1B                                    | 0.97 |
| 173 | Nfatc2        | nuclear factor of activated T-cells. cytoplasmic. calcineuri | 0.99 |
| 174 | Rgs3          | regulator of G-protein signaling 3                           | 0.98 |
| 175 | Dennd4a       | DENN/MADD domain containing 4A                               | 1.52 |
| 176 | Dapk2         | death-associated protein kinase 2                            | 1.22 |
| 177 | Syt13         | synaptotagmin-like 3                                         | 1.01 |
| 178 | Dennd4c       | DENN/MADD domain containing 4C                               | 0.9  |
| 179 | Snx10         | sorting nexin 10                                             | 0.96 |
| 180 | Prf1          | perforin 1 (pore forming protein)                            | 1.25 |
| 181 | Ggh           | gamma-glutamyl hydrolase                                     | 1.06 |
| 182 | Odc1          | ornithine decarboxylase. structural 1                        | 0.9  |
| 183 | 6330512M04Rik | RIKEN cDNA 6330512M04 gene                                   | 1.18 |
| 184 | Cldnd1        | claudin domain containing 1                                  | 1    |
| 185 | Sntb2         | syntrophin. basic 2                                          | 0.94 |
| 186 | Cpd           | carboxypeptidase D                                           | 1    |
| 187 | Stard10       | START domain containing 10                                   | 1.26 |
| 188 | Chpt1         | choline phosphotransferase 1                                 | 0.87 |
| 189 | Itgal         | integrin alpha L                                             | 1.17 |
| 190 | 2010002N04Rik | RIKEN cDNA 2010002N04 gene                                   | 0.88 |
| 191 | Rhoc          | ras homolog gene family. member C                            | 0.92 |
| 192 | Pla2g16       | phospholipase A2. group XVI                                  | 0.84 |
| 193 | Vim           | vimentin                                                     | 1.09 |
| 194 | Mcart6        | mitochondrial carrier triple repeat 6                        | 0.74 |
| 195 | AW112010      | expressed sequence AW112010                                  | 0.76 |
| 196 | 1110067D22Rik | RIKEN cDNA 1110067D22 gene                                   | 0.91 |
| 197 | Wdr95         | WD40 repeat domain 95                                        | 0.99 |
| 198 | Zbtb7b        | zinc finger and BTB domain containing 7B                     | 1.14 |
| 199 | Jdp2          | Jun dimerization protein 2                                   | 0.83 |
| 200 | Serpnb6b      | serine (or cysteine) peptidase inhibitor. clade B. member 6b | 0.83 |
| 201 | Pou6f1        | POU domain. class 6. transcription factor 1                  | 0.95 |
| 202 | Mx1           | myxovirus (influenza virus) resistance 1                     | 0.78 |
| 203 | Sidt1         | SID1 transmembrane family. member 1                          | 0.86 |
| 204 | Prr13         | proline rich 13                                              | 0.89 |
| 205 | Pou2f2        | POU domain. class 2. transcription factor 2                  | 0.81 |
| 206 | Il7r          | interleukin 7 receptor                                       | 1.01 |
| 207 | Ncald         | neurocalcin delta                                            | 1.05 |
| 208 | Mapkapk3      | mitogen-activated protein kinase-activated protein kinase 3  | 0.73 |
| 209 | Prkce         | protein kinase C. epsilon                                    | 0.94 |
| 210 | Nfil3         | nuclear factor. interleukin 3. regulated                     | 0.92 |
| 211 | Stk39         | serine/threonine kinase 39. STE20/SPS1 homolog (yeast)       | 0.85 |
| 212 | Dusp5         | dual specificity phosphatase 5                               | 1.14 |

|     |               |                                                              |      |
|-----|---------------|--------------------------------------------------------------|------|
| 213 | Dgkh          | diacylglycerol kinase. eta                                   | 0.92 |
| 214 | Emp1          | epithelial membrane protein 1                                | 1.14 |
| 215 | Ctsw          | cathepsin W                                                  | 0.76 |
| 216 | Bcl2          | B-cell leukemia/lymphoma 2                                   | 0.61 |
| 217 | Ctla4         | cytotoxic T-lymphocyte-associated protein 4                  | 0.88 |
| 218 | Fam129b       | family with sequence similarity 129. member B                | 0.88 |
| 219 | Slc39a4       | solute carrier family 39 (zinc transporter). member 4        | 0.78 |
| 220 | Tmem51        | transmembrane protein 51                                     | 0.81 |
| 221 | Gvin1         | GTPase. very large interferon inducible 1                    | 0.78 |
| 222 | Zcchc18       | zinc finger. CCHC domain containing 18                       | 0.79 |
| 223 | Nod1          | nucleotide-binding oligomerization domain containing 1       | 0.89 |
| 224 | 4930486L24Rik | RIKEN cDNA 4930486L24 gene                                   | 0.81 |
| 225 | Rap1gap2      | RAP1 GTPase activating protein 2                             | 1.37 |
| 226 | Cd160         | CD160 antigen                                                | 0.85 |
| 227 | Stx11         | syntaxin 11                                                  | 0.85 |
| 228 | Inpp5d        | inositol polyphosphate-5-phosphatase D                       | 0.9  |
| 229 | Map3k8        | mitogen-activated protein kinase kinase kinase 8             | 0.76 |
| 230 | Hspa1a        | heat shock protein 1A                                        | 0.99 |
| 231 | Mettl7a1      | methyltransferase like 7A1                                   | 0.88 |
| 232 | Dnaja4        | DnaJ (Hsp40) homolog. subfamily A. member 4                  | 0.8  |
| 233 | Cysltr2       | cysteinyl leukotriene receptor 2                             | 0.78 |
| 234 | Unc119        | unc-119 homolog (C. elegans)                                 | 0.88 |
| 235 | Dtx4          | deltex 4 homolog (Drosophila)                                | 0.77 |
| 236 | Vmp1          | vacuole membrane protein 1                                   | 0.61 |
| 237 | Cd82          | CD82 antigen                                                 | 0.74 |
| 238 | Myadm         | myeloid-associated differentiation marker                    | 0.83 |
| 239 | Tmbim1        | transmembrane BAX inhibitor motif containing 1               | 0.75 |
| 240 | Sh2d2a        | SH2 domain protein 2A                                        | 0.75 |
| 241 | Lamc1         | laminin. gamma 1                                             | 0.86 |
| 242 | Tnfrsf25      | tumor necrosis factor receptor superfamily. member 25        | 0.79 |
| 243 | Lgals3        | lectin. galactose binding. soluble 3                         | 1.15 |
| 244 | Epas1         | endothelial PAS domain protein 1                             | 0.85 |
| 245 | Nbeal2        | neurobeachin-like 2                                          | 1.01 |
| 246 | Rnf157        | ring finger protein 157                                      | 0.62 |
| 247 | Pcgf2         | polycomb group ring finger 2                                 | 0.86 |
| 248 | Naip2         | NLR family. apoptosis inhibitory protein 2                   | 0.94 |
| 249 | BC005685      | cDNA sequence BC005685                                       | 0.48 |
| 250 | Dstn          | destrin                                                      | 0.77 |
| 251 | Rap2a         | RAS related protein 2a                                       | 0.8  |
| 252 | Racgap1       | Rac GTPase-activating protein 1                              | 0.8  |
| 253 | Il10rb        | interleukin 10 receptor. beta                                | 0.94 |
| 254 | Usp18         | ubiquitin specific peptidase 18                              | 0.41 |
| 255 | Ust           | uronyl-2-sulfotransferase                                    | 0.76 |
| 256 | Pvt1          | plasmacytoma variant translocation 1                         | 0.76 |
| 257 | Klrb1f        | killer cell lectin-like receptor subfamily B member 1F       | 1.07 |
| 258 | Slc4a7        | solute carrier family 4. sodium bicarbonate cotransporter. m | 0.9  |
| 259 | Hcst          | hematopoietic cell signal transducer                         | 0.72 |
| 260 | Gbp7          | guanylate binding protein 7                                  | 0.49 |
| 261 | Ptpn4         | protein tyrosine phosphatase. non-receptor type 4            | 1.03 |
| 262 | Ifit3         | interferon-induced protein with tetratricopeptide repeats 3  | 0.21 |
| 263 | Ppp3cc        | protein phosphatase 3. catalytic subunit. gamma isoform      | 0.71 |
| 264 | B4galt5       | UDP-Gal:betaGlcNAc beta 1.4-galactosyltransferase. polypepti | 0.82 |
| 265 | Pfkip         | phosphofructokinase. platelet                                | 0.92 |
| 266 | F2rl2         | coagulation factor II (thrombin) receptor-like 2             | 1.07 |
| 267 | Scpep1        | serine carboxypeptidase 1                                    | 0.78 |

|     |               |                                                                                                              |       |
|-----|---------------|--------------------------------------------------------------------------------------------------------------|-------|
| 268 | Sla           | src-like adaptor                                                                                             | 0.79  |
| 269 | Glrx          | glutaredoxin                                                                                                 | 0.71  |
| 270 | Abi2          | abl-interactor 2                                                                                             | 0.63  |
| 271 | Icos          | inducible T-cell co-stimulator                                                                               | 0.66  |
| 272 | Gprin3        | GPRIN family member 3                                                                                        | 0.81  |
| 273 | Casp3         | caspase 3                                                                                                    | 0.66  |
| 274 | Wwp1          | WW domain containing E3 ubiquitin protein ligase 1                                                           | 0.89  |
| 275 | Ifitm3        | interferon induced transmembrane protein 3                                                                   | 0.28  |
| 276 | Dok2          | docking protein 2                                                                                            | 0.83  |
| 277 | Mapk11        | mitogen-activated protein kinase 11                                                                          | 0.71  |
| 278 | BC016495      | cDNA sequence BC016495                                                                                       | 0.58  |
| 279 | Plekhg3       | pleckstrin homology domain containing, family G (with RhoGef                                                 | 0.72  |
| 280 | Pde2a         | phosphodiesterase 2A. cGMP-stimulated                                                                        | 0.76  |
| 281 | Golm1         | golgi membrane protein 1                                                                                     | 0.65  |
| 282 | Lpin2         | lipin 2                                                                                                      | 0.71  |
| 283 | Tmem159       | transmembrane protein 159                                                                                    | 0.64  |
| 284 | Galnt3        | UDP-N-acetyl-alpha-D-galactosamine:polypeptide N-acetylgalac                                                 | 0.87  |
| 285 | Ptpn3         | protein tyrosine phosphatase, non-receptor type 3                                                            | 0.76  |
| 286 | Eea1          | early endosome antigen 1                                                                                     | 0.91  |
| 287 | Gpc1          | glypican 1                                                                                                   | 0.74  |
| 288 | Gfod1         | glucose-fructose oxidoreductase domain containing 1                                                          | 0.81  |
| 289 | Chic1         | cysteine-rich hydrophobic domain 1                                                                           | 0.75  |
| 290 | Rab8b         | RAB8B. member RAS oncogene family                                                                            | 0.61  |
| 291 | Crybg3        | beta-gamma crystallin domain containing 3<br>sema domain, immunoglobulin domain (Ig), TM domain, and<br>shor | 1.03  |
| 292 | Sema4f        |                                                                                                              | 0.59  |
| 293 | Mthfs         | 5, 10-methenyltetrahydrofolate synthetase                                                                    | 0.55  |
| 294 | Lass4         | LAG1 homolog, ceramide synthase 4                                                                            | 0.72  |
| 295 | Pelo          | pelota homolog (Drosophila)                                                                                  | 0.75  |
| 296 | Trip4         | thyroid hormone receptor interactor 4                                                                        | 0.77  |
| 297 | Susd3         | sushi domain containing 3                                                                                    | 0.68  |
| 298 | Lpxn          | leupaxin                                                                                                     | 0.56  |
| 299 | A930038C07Rik | RIKEN cDNA A930038C07 gene                                                                                   | 0.65  |
| 300 | Hmgb2         | high mobility group box 2                                                                                    | 1.04  |
| 301 | Rnf216        | ring finger protein 216                                                                                      | 1.01  |
| 302 | Stat4         | signal transducer and activator of transcription 4                                                           | 0.72  |
| 303 | Plac8         | placenta-specific 8                                                                                          | -0.27 |
| 304 | Acpl2         | acid phosphatase-like 2                                                                                      | 0.6   |
| 305 | Adam8         | a disintegrin and metallopeptidase domain 8                                                                  | 0.69  |
| 306 | Mtmr7         | myotubularin related protein 7                                                                               | 0.71  |
| 307 | Lmna          | lamin A                                                                                                      | 0.69  |
| 308 | Ssh1          | slingshot homolog 1 (Drosophila)                                                                             | 0.69  |
| 309 | Ifngr1        | interferon gamma receptor 1                                                                                  | 0.83  |
| 310 | Smyd1         | SET and MYND domain containing 1                                                                             | 0.68  |
| 311 | C230081A13Rik | RIKEN cDNA C230081A13 gene                                                                                   | 0.64  |
| 312 | Il15          | interleukin 15                                                                                               | 0.79  |
| 313 | Grina         | glutamate receptor, ionotropic, N-methyl D-aspartate-associa                                                 | 0.65  |
| 314 | Rptor         | regulatory associated protein of MTOR, complex 1                                                             | 0.73  |
| 315 | Lxn           | latexin                                                                                                      | 0.62  |
| 316 | Atxn1         | ataxin 1                                                                                                     | 0.78  |
| 317 | Rab19         | RAB19. member RAS oncogene family                                                                            | 0.55  |
| 318 | Apobec2       | apolipoprotein B mRNA editing enzyme, catalytic polypeptide                                                  | 0.55  |
| 319 | Apobr         | apolipoprotein B receptor                                                                                    | 0.73  |
| 320 | Ikzf3         | IKAROS family zinc finger 3                                                                                  | 0.7   |
| 321 | Usp48         | ubiquitin specific peptidase 48                                                                              | 0.82  |
| 322 | Serpinb6a     | serine (or cysteine) peptidase inhibitor, clade B, member 6a                                                 | 0.61  |



|     |               |                                                              |      |
|-----|---------------|--------------------------------------------------------------|------|
| 323 | Socs2         | suppressor of cytokine signaling 2                           | 0.72 |
| 324 | Ehbp111       | EH domain binding protein 1-like 1                           | 0.66 |
| 325 | Ctsd          | cathepsin D                                                  | 0.72 |
| 326 | Ppp1r12a      | protein phosphatase 1. regulatory (inhibitor) subunit 12A    | 0.85 |
| 327 | Slc2a3        | solute carrier family 2 (facilitated glucose transporter). m | 0.6  |
| 328 | Carhsp1       | calcium regulated heat stable protein 1                      | 0.71 |
| 329 | Lcn4          | lipocalin 4                                                  | 0.38 |
| 330 | Errfi1        | ERBB receptor feedback inhibitor 1                           | 0.95 |
| 331 | Oplah         | 5-oxoprolinase (ATP-hydrolysing)                             | 0.47 |
| 332 | Snx14         | sorting nexin 14                                             | 0.64 |
| 333 | Frm4b         | FERM domain containing 4B                                    | 0.31 |
| 334 | Ptger4        | prostaglandin E receptor 4 (subtype EP4)                     | 0.46 |
| 335 | Ncf4          | neutrophil cytosolic factor 4                                | 0.54 |
| 336 | Pik3r5        | phosphoinositide-3-kinase. regulatory subunit 5. p101        | 0.73 |
| 337 | Il15ra        | interleukin 15 receptor. alpha chain                         | 0.65 |
| 338 | Tef           | thyrotroph embryonic factor                                  | 0.74 |
| 339 | Hip1r         | huntingtin interacting protein 1 related                     | 0.67 |
| 340 | Cd7           | CD7 antigen                                                  | 0.65 |
| 341 | Reck          | reversion-inducing-cysteine-rich protein with kazal motifs   | 0.51 |
| 342 | Tmem37        | transmembrane protein 37                                     | 0.66 |
| 343 | Ccl9          | chemokine (C-C motif) ligand 9                               | 1.1  |
| 344 | L1cam         | L1 cell adhesion molecule                                    | 0.77 |
| 345 | Fam110a       | family with sequence similarity 110. member A                | 0.55 |
| 346 | Ddx28         | DEAD (Asp-Glu-Ala-Asp) box polypeptide 28                    | 0.48 |
| 347 | Atp10a        | ATPase. class V. type 10A                                    | 0.72 |
| 348 | Slco3a1       | solute carrier organic anion transporter family. member 3a1  | 0.66 |
| 349 | 3830406C13Rik | RIKEN cDNA 3830406C13 gene                                   | 0.38 |
| 350 | Bbs12         | Bardet-Biedl syndrome 12 (human)                             | 0.53 |
| 351 | Ksr1          | kinase suppressor of ras 1                                   | 0.64 |
| 352 | Atp8b4        | ATPase. class I. type 8B. member 4                           | 0.74 |
| 353 | Stap1         | signal transducing adaptor family member 1                   | 0.31 |
| 354 | Abcb1b        | ATP-binding cassette. sub-family B (MDR/TAP). member 1B      | 0.28 |
| 355 | Cyfp1         | cytoplasmic FMR1 interacting protein 1                       | 0.89 |
| 356 | Atp2b1        | ATPase. Ca <sup>++</sup> transporting. plasma membrane 1     | 0.77 |
| 357 | Sorl1         | sortilin-related receptor. LDLR class A repeats-containing   | 0.48 |
| 358 | Vopp1         | vesicular. overexpressed in cancer. prosurvival protein 1    | 0.42 |
| 359 | Cpne3         | copine III                                                   | 0.79 |
| 360 | Epsti1        | epithelial stromal interaction 1 (breast)                    | 0.78 |
| 361 | Tm6sf1        | transmembrane 6 superfamily member 1                         | 0.5  |
| 362 | Lcp1          | lymphocyte cytosolic protein 1                               | 0.6  |
| 363 | Pik3cg        | phosphoinositide-3-kinase. catalytic. gamma polypeptide      | 0.49 |
| 364 | Rhoq          | ras homolog gene family. member Q                            | 0.57 |
| 365 | Pvr           | poliovirus receptor-related 2                                | 0.69 |
| 366 | Man2a1        | mannosidase 2. alpha 1                                       | 0.69 |
| 367 | Katnb1        | katanin p80 (WD40-containing) subunit B 1                    | 0.88 |
| 368 | Gpr15         | G protein-coupled receptor 15                                | 0.73 |
| 369 | 2310044G17Rik | RIKEN cDNA 2310044G17 gene                                   | 0.61 |
| 370 | Cd80          | CD80 antigen                                                 | 0.87 |
| 371 | Cd28          | CD28 antigen                                                 | 0.76 |
| 372 | Batf          | basic leucine zipper transcription factor. ATF-like          | 0.49 |
| 373 | D19Ert737e    | DNA segment. Chr 19. ERATO Doi 737. expressed                | 0.69 |
| 374 | Gsto1         | glutathione S-transferase omega 1                            | 0.39 |
| 375 | Bspry         | B-box and SPRY domain containing                             | 0.71 |
| 376 | Bag3          | BCL2-associated athanogene 3                                 | 0.63 |
| 377 | Atp6v0d2      | ATPase. H <sup>+</sup> transporting. lysosomal V0 subunit D2 | 0.64 |

|     |               |                                                              |      |
|-----|---------------|--------------------------------------------------------------|------|
| 378 | Nptn          | neuroplastin                                                 | 0.7  |
| 379 | 2010111101Rik | RIKEN cDNA 2010111101 gene                                   | 0.48 |
| 380 | Gpr68         | G protein-coupled receptor 68                                | 0.49 |
| 381 | Ifi203        | interferon activated gene 203                                | 0.42 |
| 382 | Ifitm1        | interferon induced transmembrane protein 1                   | 0.67 |
| 383 | Mmgf2         | membrane magnesium transporter 2                             | 0.5  |
| 384 | Ube2g2        | ubiquitin-conjugating enzyme E2G 2                           | 0.71 |
| 385 | Insl6         | insulin-like 6                                               | 0.63 |
| 386 | Pdcd1lg2      | programmed cell death 1 ligand 2                             | 0.45 |
| 387 | Pmaip1        | phorbol-12-myristate-13-acetate-induced protein 1            | 0.64 |
| 388 | Lime1         | Lck interacting transmembrane adaptor 1                      | 0.5  |
| 389 | Ptger2        | prostaglandin E receptor 2 (subtype EP2)                     | 0.52 |
| 390 | Enpp1         | ectonucleotide pyrophosphatase/phosphodiesterase 1           | 0.58 |
| 391 | Litaf         | LPS-induced TN factor                                        | 0.56 |
| 392 | Arhgap18      | Rho GTPase activating protein 18                             | 0.63 |
| 393 | Pak6          | p21 protein (Cdc42/Rac)-activated kinase 6                   | 0.69 |
| 394 | Impact        | imprinted and ancient                                        | 0.6  |
| 395 | Clic4         | chloride intracellular channel 4 (mitochondrial)             | 0.52 |
| 396 | Edaradd       | EDAR (ectodysplasin-A receptor)-associated death domain      | 0.71 |
| 397 | Sephs2        | selenophosphate synthetase 2                                 | 0.64 |
| 398 | Slamf1        | signaling lymphocytic activation molecule family member 1    | 0.41 |
| 399 | Zfpm1         | zinc finger protein. multitype 1                             | 0.62 |
| 400 | Ttc7b         | tetratricopeptide repeat domain 7B                           | 0.78 |
| 401 | Sfi1          | Sfi1 homolog. spindle assembly associated (yeast)            | 0.57 |
| 402 | Wee1          | WEE 1 homolog 1 (S. pombe)                                   | 0.54 |
| 403 | Tnfrsf9       | tumor necrosis factor receptor superfamily. member 9         | 0.14 |
| 404 | 2610029I01Rik | RIKEN cDNA 2610029I01 gene                                   | 0.4  |
| 405 | Bmpr1a        | bone morphogenetic protein receptor. type 1A                 | 0.49 |
| 406 | Ap1s2         | adaptor-related protein complex 1. sigma 2 subunit           | 0.19 |
| 407 | Thtpa         | thiamine triphosphatase                                      | 0.59 |
| 408 | Ctse          | cathepsin E                                                  | 0.11 |
| 409 | Pttg1         | pituitary tumor-transforming gene 1                          | 0.6  |
| 410 | Bivm          | basic. immunoglobulin-like variable motif containing         | 0.53 |
| 411 | Ank           | progressive ankylosis                                        | 0.59 |
| 412 | Rpa2          | replication protein A2                                       | 0.61 |
| 413 | Plxnc1        | plexin C1                                                    | 0.6  |
| 414 | Sos2          | son of sevenless homolog 2 (Drosophila)                      | 0.66 |
| 415 | Cxcr4         | chemokine (C-X-C motif) receptor 4                           | 0.53 |
| 416 | Ret           | ret proto-oncogene                                           | 0.66 |
| 417 | Atp11a        | ATPase. class VI. type 11A                                   | 0.47 |
| 418 | Lysmd2        | LysM. putative peptidoglycan-binding. domain containing 2    | 0.43 |
| 419 | 1110058L19Rik | RIKEN cDNA 1110058L19 gene                                   | 0.5  |
| 420 | As3mt         | arsenic (+3 oxidation state) methyltransferase               | 0.63 |
| 421 | Cd86          | CD86 antigen                                                 | 0.4  |
| 422 | Gabarapl2     | gamma-aminobutyric acid (GABA) A receptor-associated protein | 0.78 |
| 423 | Myo5a         | myosin VA                                                    | 0.59 |
| 424 | Anxa6         | annexin A6                                                   | 0.78 |
| 425 | Fnip2         | folliculin interacting protein 2                             | 0.53 |
| 426 | Tmem163       | transmembrane protein 163                                    | 0.92 |
| 427 | Vps54         | vacuolar protein sorting 54 (yeast)                          | 0.3  |
| 428 | Ifi30         | interferon gamma inducible protein 30                        | 0.57 |
| 429 | Tmem140       | transmembrane protein 140                                    | 0.39 |
| 430 | Grap          | GRB2-related adaptor protein                                 | 0.54 |
| 431 | Nmnat2        | nicotinamide nucleotide adenyltransferase 2                  | 0.48 |
| 432 | Ntng2         | netrin G2                                                    | 0.59 |

|     |               |                                                                                                       |      |
|-----|---------------|-------------------------------------------------------------------------------------------------------|------|
| 433 | Lmnb1         | lamin B1                                                                                              | 0.54 |
| 434 | Asrgl1        | asparaginase like 1                                                                                   | 0.5  |
| 435 | St6galnac4    | ST6 (alpha-N-acetyl-neuraminy-2.3-beta-galactosyl-1.3)-N-ac                                           | 0.35 |
| 436 | Ppp1r11       | protein phosphatase 1. regulatory (inhibitor) subunit 11                                              | 0.61 |
| 437 | Pld2          | phospholipase D2                                                                                      | 0.62 |
| 438 | Lair1         | leukocyte-associated Ig-like receptor 1                                                               | 0.56 |
| 439 | Mettl21d      | methyltransferase like 21D                                                                            | 0.16 |
| 440 | Mrpl52        | mitochondrial ribosomal protein L52                                                                   | 0.2  |
| 441 | S1pr2         | sphingosine-1-phosphate receptor 2                                                                    | 0.45 |
| 442 | Gm14005       | predicted gene 14005                                                                                  | 0.54 |
| 443 | Gdf11         | growth differentiation factor 11                                                                      | 0.79 |
| 444 | Pde7a         | phosphodiesterase 7A                                                                                  | 0.65 |
| 445 | Cd47          | CD47 antigen (Rh-related antigen. integrin-associated signal                                          | 0.46 |
| 446 | Itgb2         | integrin beta 2                                                                                       | 0.55 |
| 447 | sept-11       | septin 11                                                                                             | 0.44 |
| 448 | Zfp3          | zinc finger protein 3                                                                                 | 0.59 |
| 449 | Sypl          | synaptophysin-like protein                                                                            | 0.31 |
| 450 | Plekhf1       | pleckstrin homology domain containing. family F (with FYVE d                                          | 0.56 |
| 451 | Gas7          | growth arrest specific 7                                                                              | 0.74 |
| 452 | Cd38          | CD38 antigen                                                                                          | 0.7  |
| 453 | Tyrobp        | TYRO protein tyrosine kinase binding protein                                                          | 0.52 |
| 454 | 2410022L05Rik | RIKEN cDNA 2410022L05 gene                                                                            | 0.52 |
| 455 | Nr1d2         | nuclear receptor subfamily 1. group D. member 2                                                       | 0.65 |
| 456 | Arl4c         | ADP-ribosylation factor-like 4C                                                                       | 0.63 |
| 457 | Samhd1        | SAM domain and HD domain. 1                                                                           | 0.5  |
| 458 | Fbxw8         | F-box and WD-40 domain protein 8                                                                      | 0.57 |
| 459 | Dse           | dermatan sulfate epimerase                                                                            | 0.4  |
| 460 | Nqo2          | NAD(P)H dehydrogenase. quinone 2                                                                      | 0.58 |
| 461 | Plekhm3       | pleckstrin homology domain containing. family M. member 3                                             | 0.62 |
| 462 | Gimap4        | GTPase. IMAP family member 4                                                                          | 0.54 |
| 463 | H2-Q8         | histocompatibility 2. Q region locus 8                                                                | 0.63 |
| 464 | Myo3b         | myosin IIIB                                                                                           | 0.81 |
| 465 | Klf10         | Kruppel-like factor 10                                                                                | 0.54 |
| 466 | Kbtbd11       | kelch repeat and BTB (POZ) domain containing 11                                                       | 0.5  |
| 467 | Kdelc1        | KDEL (Lys-Asp-Glu-Leu) containing 1                                                                   | 0.36 |
| 468 | Nedd4         | neural precursor cell expressed. developmentally down-regula                                          | 0.56 |
| 469 | Fam26f        | family with sequence similarity 26. member F                                                          | 0.15 |
| 470 | Med7          | mediator complex subunit 7                                                                            | 0.32 |
| 471 | Ptpre         | protein tyrosine phosphatase. receptor type. E                                                        | 0.61 |
| 472 | Cpox          | coproporphyrinogen oxidase                                                                            | 0.3  |
| 473 | Fpgt          | fucose-1-phosphate guanylyltransferase                                                                | 0.21 |
| 474 | Rbpj          | recombination signal binding protein for immunoglobulin kappa                                         | 0.31 |
| 475 | Jak2          | Janus kinase 2                                                                                        | 0.32 |
| 476 | Mlkl          | mixed lineage kinase domain-like                                                                      | 0.63 |
| 477 | Tnfrsf18      | tumor necrosis factor receptor superfamily. member 18                                                 | 0.28 |
| 478 | Fcho2         | FCH domain only 2                                                                                     | 0.6  |
| 479 | Cyba          | cytochrome b-245. alpha polypeptide                                                                   | 0.29 |
| 480 | 2700089E24Rik | RIKEN cDNA 2700089E24 gene                                                                            | 0.32 |
| 481 | Cdkn1a        | cyclin-dependent kinase inhibitor 1A (P21)                                                            | 0.51 |
| 482 | Slc15a3       | solute carrier family 15. member 3<br>sema domain. immunoglobulin domain (Ig). transmembrane<br>domai | 0.5  |
| 483 | Sema4a        |                                                                                                       | 0.47 |
| 484 | Iqgap2        | IQ motif containing GTPase activating protein 2                                                       | 0.71 |
| 485 | Rnf19b        | ring finger protein 19B                                                                               | 0.5  |
| 486 | Pde8a         | phosphodiesterase 8A                                                                                  | 0.55 |
| 487 | Dynlt3        | dynein light chain Tctex-type 3                                                                       | 0.04 |

|     |               |                                                              |      |
|-----|---------------|--------------------------------------------------------------|------|
| 488 | Rdm1          | RAD52 motif 1                                                | 0.42 |
| 489 | Hk2           | hexokinase 2                                                 | 0.44 |
| 490 | Rabgap1l      | RAB GTPase activating protein 1-like                         | 0.53 |
| 491 | Tulp4         | tubby like protein 4                                         | 0.41 |
| 492 | Trim30d       | tripartite motif-containing 30D                              | 0.22 |
| 493 | Nsmaf         | neutral sphingomyelinase (N-SMase) activation associated fac | 0.54 |
| 494 | Rcn1          | reticulocalbin 1                                             | 0.36 |
| 495 | Dopey2        | dopey family member 2                                        | 0.43 |
| 496 | Tmtc4         | transmembrane and tetratricopeptide repeat containing 4      | 0.51 |
| 497 | Ifnar2        | interferon (alpha and beta) receptor 2                       | 0.46 |
| 498 | 1110001A16Rik | RIKEN cDNA 1110001A16 gene                                   | 0.46 |
| 499 | Wdfy1         | WD repeat and FYVE domain containing 1                       | 0.44 |
| 500 | Ubc           | ubiquitin A-52 residue ribosomal protein fusion product 1    | 0.6  |
| 501 | Itgam         | integrin alpha M                                             | 0.63 |
| 502 | Ebpl          | emopamil binding protein-like                                | 0.42 |
| 503 | Dyrk3         | dual-specificity tyrosine-(Y)-phosphorylation regulated kina | 0.44 |
| 504 | Abhd14a       | abhydrolase domain containing 14A                            | 0.46 |
| 505 | H1f0          | H1 histone family. member 0                                  | 0.6  |
| 506 | Scrn3         | secernin 3                                                   | 0.53 |
| 507 | Plcd1         | phospholipase C. delta 1                                     | 0.69 |
| 508 | Cyb5r4        | cytochrome b5 reductase 4                                    | 0.53 |
| 509 | Txndc5        | thioredoxin domain containing 5                              | 0.62 |
| 510 | Fyn           | Fyn proto-oncogene                                           | 0.64 |
| 511 | Nek6          | NIMA (never in mitosis gene a)-related expressed kinase 6    | 0.44 |
| 512 | Dcbl2         | discoidin. CUB and LCCL domain containing 2                  | 0.45 |
| 513 | St3gal4       | ST3 beta-galactoside alpha-2.3-sialyltransferase 4           | 0.57 |
| 514 | Havcr2        | hepatitis A virus cellular receptor 2                        | 0.43 |
| 515 | Phf21b        | PHD finger protein 21B                                       | 0.53 |
| 516 | Pdcd1         | programmed cell death 1                                      | 0.82 |
| 517 | Vkorc1        | vitamin K epoxide reductase complex. subunit 1               | 0.29 |
| 518 | Irak2         | interleukin-1 receptor-associated kinase 2                   | 0.46 |
| 519 | Prkcz         | protein kinase C. zeta                                       | 0.57 |
| 520 | Zfp69         | zinc finger protein 84                                       | 0.44 |
| 521 | Gapdh         | glyceraldehyde-3-phosphate dehydrogenase                     | 0.7  |
| 522 | Parp8         | poly (ADP-ribose) polymerase family. member 8                | 0.5  |
| 523 | Rab39b        | RAB39B. member RAS oncogene family                           | 0.46 |
| 524 | Krtcap2       | keratinocyte associated protein 2                            | 0.3  |
| 525 | Aplp2         | amyloid beta (A4) precursor-like protein 2                   | 0.7  |
| 526 | Etfb          | electron transferring flavoprotein. beta polypeptide         | 0.48 |
| 527 | Smap1         | stromal membrane-associated protein 1                        | 0.69 |
| 528 | H2-Q7         | histocompatibility 2. Q region locus 7                       | 0.52 |
| 529 | Map2k3        | mitogen-activated protein kinase kinase 3                    | 0.34 |
| 530 | Fam92a        | family with sequence similarity 92. member A                 | 0.39 |
| 531 | Nek7          | NIMA (never in mitosis gene a)-related expressed kinase 7    | 0.44 |
| 532 | Tbc1d12       | TBC1D12: TBC1 domain family. member 12                       | 0.46 |
| 533 | Nckap1        | NCK-associated protein 1                                     | 0.4  |
| 534 | Nudt4         | nudix (nucleoside diphosphate linked moiety X)-type motif 4  | 0.49 |
| 535 | Mki67         | antigen identified by monoclonal antibody Ki 67              | 0.37 |
| 536 | 1700049G17Rik | RIKEN cDNA 1700049G17 gene                                   | 0.38 |
| 537 | Igf2r         | insulin-like growth factor 2 receptor                        | 0.64 |
| 538 | BC004004      | cDNA sequence BC004004                                       | 0.36 |
| 539 | Cd2           | CD2 antigen                                                  | 0.49 |
| 540 | Tbkbp1        | TBK1 binding protein 1                                       | 0.58 |
| 541 | Ppp1r3e       | protein phosphatase 1. regulatory (inhibitor) subunit 3E     | 0.46 |
| 542 | Fam49a        | family with sequence similarity 49. member A                 | 0.59 |

|     |               |                                                                     |      |
|-----|---------------|---------------------------------------------------------------------|------|
| 543 | Kdm4d         | lysine (K)-specific demethylase 4D                                  | 0.52 |
| 544 | Fam19a3       | family with sequence similarity 19. member A3                       | 0.61 |
| 545 | Cmc1          | COX assembly mitochondrial protein homolog ( <i>S. cerevisiae</i> ) | 0.37 |
| 546 | Slc16a6       | solute carrier family 16 (monocarboxylic acid transporters).        | 0.46 |
| 547 | Rhbdf2        | rhomboid 5 homolog 2 ( <i>Drosophila</i> )                          | 0.5  |
| 548 | Tk1           | thymidine kinase 1                                                  | 0.63 |
| 549 | Zbtb42        | zinc finger and BTB domain containing 42                            | 0.46 |
| 550 | Crot          | carnitine O-octanoyltransferase                                     | 0.44 |
| 551 | Armc7         | armadillo repeat containing 7                                       | 0.54 |
| 552 | Abhd14b       | abhydrolase domain containing 14b                                   | 0.32 |
| 553 | Traf1         | TNF receptor-associated factor 1                                    | 0.53 |
| 554 | Capg          | capping protein (actin filament). gelsolin-like                     | 0.56 |
| 555 | Polk          | polymerase (DNA directed). kappa                                    | 0.37 |
| 556 | Cd40lg        | CD40 ligand                                                         | 0.13 |
| 557 | Prdx4         | peroxiredoxin 4                                                     | 0.48 |
| 558 | Pdgfb         | platelet derived growth factor. B polypeptide                       | 0.68 |
| 559 | Cnrip1        | cannabinoid receptor interacting protein 1                          | 0.64 |
| 560 | Clstn1        | calsyntenin 1                                                       | 0.49 |
| 561 | Dnajc15       | DnaJ (Hsp40) homolog. subfamily C. member 15                        | 0.37 |
| 562 | Plagl1        | pleiomorphic adenoma gene-like 1                                    | 0.37 |
| 563 | Slc3a2        | solute carrier family 3 (activators of dibasic and neutral a        | 0.28 |
| 564 | Tdrd7         | tudor domain containing 7                                           | 0.34 |
| 565 | Osbpl5        | oxysterol binding protein-like 5                                    | 0.51 |
| 566 | Thap3         | THAP domain containing. apoptosis associated protein 3              | 0.49 |
| 567 | Tmed3         | transmembrane emp24 domain containing 3                             | 0.21 |
| 568 | Tesk1         | testis specific protein kinase 1                                    | 0.5  |
| 569 | Crip1         | cysteine-rich protein 1 (intestinal)                                | 0.49 |
| 570 | Slc41a2       | solute carrier family 41. member 2                                  | 0.52 |
| 571 | Cldnd2        | claudin domain containing 2                                         | 0.52 |
| 572 | Tyk2          | tyrosine kinase 2                                                   | 0.34 |
| 573 | Impa2         | inositol (myo)-1(or 4)-monophosphatase 2                            | 0.41 |
| 574 | Cpeb2         | cytoplasmic polyadenylation element binding protein 2               | 0.49 |
| 575 | Laptn5        | lysosomal-associated protein transmembrane 5                        | 0.54 |
| 576 | Calm2         | calmodulin 1                                                        | 0.8  |
| 577 | Rara          | retinoic acid receptor. alpha                                       | 0.56 |
| 578 | Hgsnat        | heparan-alpha-glucosaminide N-acetyltransferase                     | 0.49 |
| 579 | Selm          | selenoprotein M                                                     | 0.4  |
| 580 | Angptl4       | angiopoietin-like 4                                                 | 0.42 |
| 581 | Rab23         | RAB23. member RAS oncogene family                                   | 0.33 |
| 582 | Mapk12        | mitogen-activated protein kinase 12                                 | 0.51 |
| 583 | Cks2          | CDC28 protein kinase regulatory subunit 2                           | 0.01 |
| 584 | Plekhb2       | pleckstrin homology domain containing. family B (evectins) m        | 0.43 |
| 585 | Asap2         | ArfGAP with SH3 domain. ankyrin repeat and PH domain 2              | 0.54 |
| 586 | Prune         | prune homolog ( <i>Drosophila</i> )                                 | 0.53 |
| 587 | 2310046K01Rik | RIKEN cDNA 2310046K01 gene                                          | 0.39 |
| 588 | S100a11       | S100 calcium binding protein A11 (calgizzarin)                      | 0.79 |
| 589 | Txnrd1        | thioredoxin reductase 1                                             | 0.3  |
| 590 | Tmem180       | transmembrane protein 180                                           | 0.41 |
| 591 | Ehd3          | EH-domain containing 3                                              | 0.6  |
| 592 | Ubxn2b        | UBX domain protein 2B                                               | 0.34 |
| 593 | Rbm47         | RNA binding motif protein 47                                        | 0.46 |
| 594 | Zbtb38        | zinc finger and BTB domain containing 38                            | 0.54 |
| 595 | Vcl           | vinculin                                                            | 0.47 |
| 596 | Crb3          | crumbs homolog 3 ( <i>Drosophila</i> )                              | 0.46 |
| 597 | Chst2         | carbohydrate sulfotransferase 2                                     | 0.42 |

|     |               |                                                                                        |      |
|-----|---------------|----------------------------------------------------------------------------------------|------|
| 598 | Fbxw7         | F-box and WD-40 domain protein 7                                                       | 0.35 |
| 599 | 2210411K11Rik | RIKEN cDNA 2210411K11 gene                                                             | 0.41 |
| 600 | Samsn1        | SAM domain. SH3 domain and nuclear localization signals. 1                             | 0.29 |
| 601 | Gpr132        | G protein-coupled receptor 132                                                         | 0.68 |
| 602 | Dnajb6        | DnaJ (Hsp40) homolog. subfamily B. member 6                                            | 0.39 |
| 603 | Obfc2a        | oligonucleotide/oligosaccharide-binding fold containing 2A                             | 0.51 |
| 604 | Ralgds        | ral guanine nucleotide dissociation stimulator                                         | 0.4  |
| 605 | 9630033F20Rik | RIKEN cDNA 9630033F20 gene                                                             | 0.36 |
| 606 | Atxn2l        | ataxin 2-like                                                                          | 0.52 |
| 607 | Tnfaip3       | tumor necrosis factor. alpha-induced protein 3                                         | 0.68 |
| 608 | Cblb          | Casitas B-lineage lymphoma b                                                           | 0.41 |
| 609 | Tgoln1        | trans-golgi network protein                                                            | 0.52 |
| 610 | Aars          | alanyl-tRNA synthetase                                                                 | 0.38 |
| 611 | Sfxn1         | sideroflexin 1                                                                         | 0.1  |
| 612 | Ostf1         | osteoclast stimulating factor 1                                                        | 0.42 |
| 613 | Ei24          | etoposide induced 2.4 mRNA                                                             | 0.17 |
| 614 | Igk           | immunoglobulin kappa chain complex                                                     | 0.39 |
| 615 | Cd8a          | CD8 antigen. alpha chain                                                               | 0.38 |
| 616 | B3gnt5        | UDP-GlcNAc:betaGal beta-1.3-N-acetylglucosaminyltransferase                            | 0.32 |
| 617 | Wbp1          | WW domain binding protein 1<br>cat eye syndrome chromosome region. candidate 5 homolog | 0.38 |
| 618 | Cecr5         | (hum)                                                                                  | 0.43 |
| 619 | Ubash3a       | ubiquitin associated and SH3 domain containing. A                                      | 0.4  |
| 620 | Tg            | thyroglobulin                                                                          | 0.37 |
| 621 | Zfp821        | zinc finger protein 821                                                                | 0.39 |
| 622 | Pear1         | platelet endothelial aggregation receptor 1                                            | 0.45 |
| 623 | Hint2         | histidine triad nucleotide binding protein 2                                           | 0.26 |
| 624 | Ifit2         | interferon-induced protein with tetratricopeptide repeats 2                            | 0.07 |
| 625 | Calhm2        | calcium homeostasis modulator 2                                                        | 0.39 |
| 626 | Nfat5         | nuclear factor of activated T-cells 5                                                  | 0.36 |
| 627 | Whsc1         | Wolf-Hirschhorn syndrome candidate 1 (human)                                           | 0.39 |
| 628 | Dhrs7         | dehydrogenase/reductase (SDR family) member 7                                          | 0.2  |
| 629 | Tesc          | tescalcin                                                                              | 0.29 |
| 630 | Bicap         | bladder cancer associated protein homolog (human)                                      | 0.3  |
| 631 | Mfsd6         | major facilitator superfamily domain containing 6                                      | 0.34 |
| 632 | Fryl          | furry homolog-like (Drosophila)                                                        | 0.38 |
| 633 | Rhof          | ras homolog gene family. member f                                                      | 0.26 |
| 634 | Padi2         | peptidyl arginine deiminase. type II                                                   | 0.22 |
| 635 | Nr1d1         | nuclear receptor subfamily 1. group D. member 1                                        | 0.5  |
| 636 | Rabep2        | rabaptin. RAB GTPase binding effector protein 2                                        | 0.47 |
| 637 | Ubash3b       | ubiquitin associated and SH3 domain containing. B                                      | 0.28 |
| 638 | Mns1          | meiosis-specific nuclear structural protein 1                                          | 0.38 |
| 639 | D8Ert82e      | DNA segment. Chr 8. ERATO Doi 82. expressed                                            | 0.32 |
| 640 | Ptpn22        | protein tyrosine phosphatase. non-receptor type 22 (lymphoid                           | 0.53 |
| 641 | Phf1          | PHD finger protein 1                                                                   | 0.55 |
| 642 | Ccdc107       | coiled-coil domain containing 107                                                      | 0.28 |
| 643 | Tnfsf10       | tumor necrosis factor (ligand) superfamily. member 10                                  | 0.13 |
| 644 | Syngn2        | synaptogyrin 2                                                                         | 0.42 |
| 645 | AY036118      | cDNA sequence AY036118                                                                 | 0.89 |
| 646 | Sec24d        | Sec24 related gene family. member D (S. cerevisiae)                                    | 0.44 |
| 647 | Eif4ebp1      | eukaryotic translation initiation factor 4E binding protein                            | 0.33 |
| 648 | Cd68          | CD68 antigen                                                                           | 0.57 |
| 649 | Rinl          | Ras and Rab interactor-like                                                            | 0.41 |
| 650 | Med12l        | mediator of RNA polymerase II transcription. subunit 12 homo                           | 0.36 |
| 651 | Surf1         | surfeit gene 1                                                                         | 0.31 |
| 652 | Frrs1         | ferric-chelate reductase 1                                                             | 0.24 |

|     |               |                                                               |       |
|-----|---------------|---------------------------------------------------------------|-------|
| 653 | 1810027O10Rik | RIKEN cDNA 1810027O10 gene                                    | 0.23  |
| 654 | Gem           | GTP binding protein (gene overexpressed in skeletal muscle)   | 0.42  |
| 655 | Mrpl44        | mitochondrial ribosomal protein L44                           | 0.24  |
| 656 | Gpr137b-ps    | G protein-coupled receptor 137B. pseudogene                   | 0.43  |
| 657 | 1110008P14Rik | RIKEN cDNA 1110008P14 gene                                    | 0.4   |
| 658 | Haus4         | HAUS augmin-like complex. subunit 4                           | 0.41  |
| 659 | Mthfr         | 5.10-methylenetetrahydrofolate reductase                      | 0.4   |
| 660 | Ide           | insulin degrading enzyme                                      | 0.46  |
| 661 | Glipr2        | GLI pathogenesis-related 2                                    | 0.36  |
| 662 | Gpr155        | G protein-coupled receptor 155                                | 0.61  |
| 663 | Mknk2         | MAP kinase-interacting serine/threonine kinase 2              | 0.53  |
| 664 | Sema4d        | sema domain. immunoglobulin domain (Ig). transmembrane domain | 0.43  |
| 665 | Ly96          | lymphocyte antigen 96                                         | 0.21  |
| 666 | Rttm          | rotatin                                                       | 0.23  |
| 667 | Rgs2          | regulator of G-protein signaling 2                            | 0.66  |
| 668 | Serinc3       | serine incorporator 3                                         | 0.58  |
| 669 | Pip4k2b       | phosphatidylinositol-5-phosphate 4-kinase. type II. beta      | 0.33  |
| 670 | Alox8         | arachidonate 8-lipoxygenase                                   | 0.57  |
| 671 | Pim1          | proviral integration site 1                                   | 0.69  |
| 672 | Slc9a9        | solute carrier family 9 (sodium/hydrogen exchanger). member   | 0.57  |
| 673 | Naip5         | NLR family. apoptosis inhibitory protein 5                    | 0.48  |
| 674 | Tmem8         | transmembrane protein 8 (five membrane-spanning domains)      | 0.41  |
| 675 | H2afz         | H2A histone family. member Z                                  | 0.49  |
| 676 | Abi3          | ABI gene family. member 3                                     | 0.19  |
| 677 | Grk5          | G protein-coupled receptor kinase 5                           | 0.35  |
| 678 | Pycard        | PYD and CARD domain containing                                | 0.22  |
| 679 | Slc35f2       | solute carrier family 35. member F2                           | 0.1   |
| 680 | Gas2l1        | growth arrest-specific 2 like 1                               | 0.4   |
| 681 | Tbl2          | transducin (beta)-like 2                                      | 0.52  |
| 682 | Cyp4v3        | cytochrome P450. family 4. subfamily v. polypeptide 3         | 0.2   |
| 683 | Ryk           | receptor-like tyrosine kinase                                 | 0.56  |
| 684 | Alad          | aminolevulinate. delta-. dehydratase                          | 0.39  |
| 685 | Nr4a2         | nuclear receptor subfamily 4. group A. member 2               | 0.51  |
| 686 | Bcl6          | B-cell leukemia/lymphoma 6                                    | 0.2   |
| 687 | Hps4          | Hermansky-Pudlak syndrome 4 homolog (human)                   | 0.21  |
| 688 | Marvel2       | MARVEL (membrane-associating) domain containing 2             | 0.34  |
| 689 | 5330426P16Rik | RIKEN cDNA 5330426P16 gene                                    | 0.43  |
| 690 | Pigc          | phosphatidylinositol glycan anchor biosynthesis. class C      | 0.23  |
| 691 | Chac1         | ChaC. cation transport regulator-like 1 (E. coli)             | 0.4   |
| 692 | Pxmp3         | peroxisomal membrane protein 3                                | -0.05 |
| 693 | Nradd         | neurotrophin receptor associated death domain                 | 0.5   |
| 694 | Cd22          | CD22 antigen                                                  | 0.63  |
| 695 | Pbx3          | pre B-cell leukemia transcription factor 3                    | 0.49  |
| 696 | Dym           | dymeclin                                                      | 0.39  |
| 697 | Glipr1        | GLI pathogenesis-related 1 (glioma)                           | 0.24  |
| 698 | Rnf39         | ring finger protein 39                                        | 0.41  |
| 699 | Pygl          | liver glycogen phosphorylase                                  | 0.43  |
| 700 | Gpr174        | G protein-coupled receptor 174                                | 0.09  |
| 701 | Tnfsf8        | tumor necrosis factor (ligand) superfamily. member 8          | -0.06 |
| 702 | Ifitm2        | interferon induced transmembrane protein 2                    | 0.48  |
| 703 | Pias3         | protein inhibitor of activated STAT 3                         | 0.45  |
| 704 | Gla           | galactosidase. alpha                                          | 0.28  |
| 705 | Mid1ip1       | Mid1 interacting protein 1 (gastrulation specific G12-like (  | 0.31  |
| 706 | Fosb          | FBJ osteosarcoma oncogene B                                   | 0.81  |
| 707 | Irf8          | interferon regulatory factor 8                                | 0.33  |

|     |            |                                                              |      |
|-----|------------|--------------------------------------------------------------|------|
| 708 | Prkca      | protein kinase C. alpha                                      | 0.46 |
| 709 | Aen        | apoptosis enhancing nuclease                                 | 0.16 |
| 710 | D16Ert472e | DNA segment. Chr 16. ERATO Doi 472. expressed                | 0.07 |
| 711 | Tmem55a    | transmembrane protein 55A                                    | 0.2  |
| 712 | Zdhhc18    | zinc finger. DHHC domain containing 18                       | 0.4  |
| 713 | Zfp937     | zinc finger protein 937                                      | 0.51 |
| 714 | Ppp2r2c    | protein phosphatase 2 (formerly 2A). regulatory subunit B (P | 0.39 |
| 715 | Wipf1      | WAS/WASL interacting protein family. member 1                | 0.41 |
| 716 | Sorbs1     | sorbin and SH3 domain containing 1                           | 0.44 |



**SUPPLEMENTARY TABLE S11.** List of down-regulated genes with their ranking in the meta-analysis performed as described in the Methods. The first column is giving the gene rank according to the gene rank product (the largest FC across studies are associated with the smallest Rank Product). The last column is the average expression levels under two conditions (Memory and Naive) given as a log<sub>2</sub> fold change. List of up-regulated genes with their ranking in the meta-analysis performed as described in the methods.

| Rank | Name          | Description                                                              | log <sub>2</sub> FC(Mem vs Na) |
|------|---------------|--------------------------------------------------------------------------|--------------------------------|
| 1    | Ccr9          | chemokine (C-C motif) receptor 9                                         | -4.05                          |
| 2    | Atp1b1        | ATPase, Na <sup>+</sup> /K <sup>+</sup> transporting, beta 1 polypeptide | -3.89                          |
| 3    | St6gal1       | beta galactoside alpha 2,6 sialyltransferase 1                           | -3.48                          |
| 4    | Igfbp4        | insulin-like growth factor binding protein 4                             | -3.43                          |
| 5    | Ifngr2        | interferon gamma receptor 2                                              | -2.69                          |
| 6    | Ephx1         | epoxide hydrolase 1, microsomal                                          | -2.94                          |
| 7    | Itgae         | integrin alpha E, epithelial-associated                                  | -2.7                           |
| 8    | Cnn3          | calponin 3, acidic                                                       | -2.6                           |
| 9    | Xkrx          | X Kell blood group precursor related X linked                            | -2.41                          |
| 10   | Ift80         | intraflagellar transport 80 homolog (Chlamydomonas)                      | -2.46                          |
| 11   | Ikzf2         | IKAROS family zinc finger 2                                              | -1.95                          |
| 12   | Timp2         | tissue inhibitor of metalloproteinase 2                                  | -2.27                          |
| 13   | Id3           | inhibitor of DNA binding 3                                               | -1.95                          |
| 14   | Actn1         | actinin, alpha 1                                                         | -2.11                          |
| 15   | Slc6a19       | solute carrier family 6 (neurotransmitter transporter), memb             | -2.27                          |
| 16   | Sox4          | SRY-box containing gene 4                                                | -2.13                          |
| 17   | Dntt          | deoxynucleotidyltransferase, terminal                                    | -1.82                          |
| 18   | Trat1         | T cell receptor associated transmembrane adaptor 1                       | -2.04                          |
| 19   | Il6st         | interleukin 6 signal transducer                                          | -2.38                          |
| 20   | Mtss1         | metastasis suppressor 1                                                  | -1.84                          |
| 21   | Rapgef4       | Rap guanine nucleotide exchange factor (GEF) 4                           | -2.27                          |
| 22   | Chst15        | carbohydrate (N-acetylgalactosamine 4-sulfate 6-O) sulfotran             | -2.02                          |
| 23   | 2610019F03Rik | RIKEN cDNA 2610019F03 gene                                               | -2.11                          |
| 24   | Cd24a         | CD24a antigen                                                            | -1.63                          |
| 25   | Ramp1         | receptor (calcitonin) activity modifying protein 1                       | -1.66                          |
| 26   | Lass6         | LAG1 homolog, ceramide synthase 6                                        | -1.78                          |
| 27   | Gsn           | gelsolin                                                                 | -1.77                          |
| 28   | Trib2         | tribbles homolog 2 (Drosophila)                                          | -1.81                          |
| 29   | Ppic          | peptidylprolyl isomerase C                                               | -1.48                          |
| 30   | Dapl1         | death associated protein-like 1                                          | -2.11                          |
| 31   | Plekho1       | pleckstrin homology domain containing, family O member 1                 | -1.52                          |
| 32   | Igf1r         | insulin-like growth factor I receptor                                    | -1.48                          |
| 33   | Tox           | thymocyte selection-associated high mobility group box                   | -1.47                          |
| 34   | Lef1          | lymphoid enhancer binding factor 1                                       | -1.47                          |
| 35   | Gpr146        | G protein-coupled receptor 146                                           | -1.55                          |
| 36   | Usp28         | ubiquitin specific peptidase 28                                          | -1.76                          |
| 37   | Acsl3         | acyl-CoA synthetase long-chain family member 3                           | -1.36                          |
| 38   | Cxxc5         | CXXC finger 5                                                            | -1.48                          |
| 39   | Ccr7          | chemokine (C-C motif) receptor 7                                         | -1.89                          |
| 40   | Inadl         | InaD-like (Drosophila)                                                   | -1.41                          |
| 41   | Sgk3          | serum/glucocorticoid regulated kinase 3                                  | -1.58                          |
| 42   | Sesn1         | sestrin 1                                                                | -1.53                          |
| 43   | Plaur         | plasminogen activator, urokinase receptor                                | -1.18                          |
| 44   | Tubb2b        | tubulin, beta 2B                                                         | -1.3                           |
| 45   | Smc4          | structural maintenance of chromosomes 4                                  | -1.56                          |

|    |               |                                                              |       |
|----|---------------|--------------------------------------------------------------|-------|
| 46 | Afap1         | actin filament associated protein 1                          | -1.41 |
| 47 | Ralgps2       | Ral GEF with PH domain and SH3 binding motif 2               | -1.36 |
| 48 | 5730508B09Rik | RIKEN cDNA 5730508B09 gene                                   | -1.55 |
| 49 | Sell          | selectin, lymphocyte                                         | -1.52 |
| 50 | Il6ra         | interleukin 6 receptor, alpha                                | -1.21 |
| 51 | Tspan32       | tetraspanin 32                                               | -1.4  |
| 52 | Cyth3         | cytohesin 3                                                  | -1.33 |
| 53 | Pdk1          | 3-phosphoinositide dependent protein kinase 1                | -1.47 |
| 54 | St8sia1       | ST8 alpha-N-acetyl-neuraminide alpha-2,8-sialyltransferase 1 | -1.97 |
| 55 | Slc43a2       | solute carrier family 43, member 2                           | -1.33 |
| 56 | Baz2b         | bromodomain adjacent to zinc finger domain, 2B               | -1.13 |
| 57 | Adcy6         | adenylate cyclase 6                                          | -1.04 |
| 58 | Adk           | adenosine kinase                                             | -1.28 |
| 59 | Ldhd          | lactate dehydrogenase B                                      | -1.17 |
| 60 | Dusp10        | dual specificity phosphatase 10                              | -1.02 |
| 61 | Rgs10         | regulator of G-protein signalling 10                         | -1.34 |
| 62 | Basp1         | brain abundant, membrane attached signal protein 1           | -1.02 |
| 63 | Als2cl        | ALS2 C-terminal like                                         | -1.55 |
| 64 | Sepp1         | selenoprotein P, plasma, 1                                   | -1.23 |
| 65 | Amigo2        | adhesion molecule with Ig like domain 2                      | -1.32 |
| 66 | Trem2         | triggering receptor expressed on myeloid cells-like 2        | -1.44 |
| 67 | Pik3ip1       | phosphoinositide-3-kinase interacting protein 1              | -1.27 |
| 68 | Sfmbt2        | Scm-like with four mbt domains 2                             | -1.19 |
| 69 | Pecam1        | platelet/endothelial cell adhesion molecule 1                | -1.12 |
| 70 | 1190002H23Rik | RIKEN cDNA 1190002H23 gene                                   | -1.09 |
| 71 | Nipal1        | NIPA-like domain containing 1                                | -1.14 |
| 72 | Etv3          | ets variant gene 3                                           | -1.34 |
| 73 | Bcl9          | B-cell CLL/lymphoma 9                                        | -1.3  |
| 74 | Tubb2a        | tubulin, beta 2A                                             | -0.93 |
| 75 | Lipa          | lysosomal acid lipase A                                      | -1.21 |
| 76 | Usp6nl        | USP6 N-terminal like                                         | -1.27 |
| 77 | Cd55          | CD55 antigen                                                 | -1.32 |
| 78 | Tmie          | transmembrane inner ear                                      | -1.23 |
| 79 | Rras2         | related RAS viral (r-ras) oncogene homolog 2                 | -1.22 |
| 80 | Ext1          | exostoses (multiple) 1                                       | -1.17 |
| 81 | Fam101b       | family with sequence similarity 101, member B                | -1.33 |
| 82 | N4bp2         | NEDD4 binding protein 2                                      | -1.34 |
| 83 | Abca3         | ATP-binding cassette, sub-family A (ABC1), member 3          | -1.2  |
| 84 | Rab3ip        | RAB3A interacting protein                                    | -1.37 |
| 85 | Ampd1         | adenosine monophosphate deaminase 1                          | -1.41 |
| 86 | Cep97         | centrosomal protein 97                                       | -1.19 |
| 87 | Qser1         | glutamine and serine rich 1                                  | -1.04 |
| 88 | Cd81          | CD81 antigen                                                 | -0.83 |
| 89 | Spred1        | sprouty protein with EVH-1 domain 1, related sequence        | -1.04 |
| 90 | Idh2          | isocitrate dehydrogenase 2 (NADP+), mitochondrial            | -1.11 |
| 91 | Iitm2a        | integral membrane protein 2A                                 | -1.16 |
| 92 | 2410066E13Rik | RIKEN cDNA 2410066E13 gene                                   | -1.19 |
| 93 | Lztf1         | leucine zipper transcription factor-like 1                   | -1.26 |
| 94 | Gria3         | glutamate receptor, ionotropic, AMPA3 (alpha 3)              | -1.05 |
| 95 | Eng           | endoglin                                                     | -1.05 |
| 96 | Spnb2         | spectrin beta 2                                              | -0.96 |
| 97 | H2-Oa         | histocompatibility 2, O region alpha locus                   | -1.1  |
| 98 | Scml4         | sex comb on midleg-like 4 (Drosophila)                       | -1    |

|     |          |                                                              |       |
|-----|----------|--------------------------------------------------------------|-------|
| 99  | Tcf7l2   | transcription factor 7-like 2, T-cell specific, HMG-box      | -0.71 |
| 100 | Prkd2    | protein kinase D2                                            | -0.97 |
| 101 | Zdhhc14  | zinc finger, DHHC domain containing 14                       | -0.7  |
| 102 | Slc16a5  | solute carrier family 16 (monocarboxylic acid transporters), | -1.43 |
| 103 | Tspan13  | tetraspanin 13                                               | -1.16 |
| 104 | Gtf2ird1 | general transcription factor II I repeat domain-containing 1 | -0.89 |
| 105 | Calcr1   | calcitonin receptor-like                                     | -1.22 |
| 106 | Hdac4    | histone deacetylase 5                                        | -0.91 |
| 107 | Slc16a10 | solute carrier family 16 (monocarboxylic acid transporters), | -1.09 |
| 108 | Tet1     | tet oncogene 1                                               | -1.39 |
| 109 | Hectd2   | HECT domain containing 2                                     | -1.08 |
| 110 | Bach2    | BTB and CNC homology 2                                       | -1.14 |
| 111 | Kif13a   | kinesin family member 13A                                    | -0.81 |
| 112 | Egr2     | early growth response 2                                      | -1.12 |
| 113 | Ttc28    | tetratricopeptide repeat domain 28                           | -0.89 |
| 114 | Aff3     | AF4/FMR2 family, member 3                                    | -0.94 |
| 115 | Serinc5  | serine incorporator 5                                        | -0.85 |
| 116 | Spre2    | sprouty-related, EVH1 domain containing 2                    | -1.07 |
| 117 | Acvr1b   | activin A receptor, type 1B                                  | -1.14 |
| 118 | Abca1    | ATP-binding cassette, sub-family A (ABC1), member 1          | -0.79 |
| 119 | Sh3pxd2a | SH3 and PX domains 2A                                        | -1.11 |
| 120 | Nrip1    | nuclear receptor interacting protein 1                       | -0.93 |
| 121 | Tec      | tec protein tyrosine kinase                                  | -0.93 |
| 122 | Tsc22d1  | TSC22 domain family, member 1                                | -0.99 |
| 123 | Slamf6   | SLAM family member 6                                         | -0.96 |
| 124 | Stambpl1 | STAM binding protein like 1                                  | -0.89 |
| 125 | Pacsin1  | protein kinase C and casein kinase substrate in neurons 1    | -1.07 |
| 126 | Elovl6   | ELOVL family member 6, elongation of long chain fatty acids  | -0.88 |
| 127 | Pou2af1  | POU domain, class 2, associating factor 1                    | -0.96 |
| 128 | Zbtb10   | zinc finger and BTB domain containing 10                     | -0.73 |
| 129 | Ttc3     | tetratricopeptide repeat domain 3                            | -1.07 |
| 130 | Nr4a1    | nuclear receptor subfamily 4, group A, member 1              | -0.97 |
| 131 | Nab2     | Ngfi-A binding protein 2                                     | -0.92 |
| 132 | Ggt1     | gamma-glutamyltransferase 1                                  | -1.21 |
| 133 | Armcx2   | armadillo repeat containing, X-linked 2                      | -1.14 |
| 134 | Cpm      | carboxypeptidase M                                           | -1.26 |
| 135 | Arhgef11 | Rho guanine nucleotide exchange factor (GEF) 11              | -0.73 |
| 136 | Ramp3    | receptor (calcitonin) activity modifying protein 3           | -0.63 |
| 137 | Art2b    | ADP-ribosyltransferase 2b                                    | -1.48 |
| 138 | Cnksr3   | Cnksr family member 3                                        | -0.72 |
| 139 | Ncf1     | neutrophil cytosolic factor 1                                | -1.25 |
| 140 | App      | amyloid beta (A4) precursor protein                          | -1.04 |
| 141 | Rbm38    | RNA binding motif protein 38                                 | -0.9  |
| 142 | Dnmt3a   | DNA methyltransferase 3A                                     | -1.03 |
| 143 | Mgst2    | microsomal glutathione S-transferase 2                       | -1.19 |
| 144 | Insr     | insulin receptor                                             | -0.89 |
| 145 | Ctsl     | cathepsin L                                                  | -0.93 |
| 146 | Lclat1   | lysocardiolipin acyltransferase 1                            | -1.01 |
| 147 | Satb1    | special AT-rich sequence binding protein 1                   | -0.97 |
| 148 | Laptm4b  | lysosomal-associated protein transmembrane 4B                | -0.74 |
| 149 | Plekhg2  | pleckstrin homology domain containing, family G (with RhoGef | -0.86 |
| 150 | Kif1b    | kinesin family member 1B                                     | -0.87 |
| 151 | Mex3b    | mex3 homolog B (C. elegans)                                  | -0.92 |

|     |               |                                                              |       |
|-----|---------------|--------------------------------------------------------------|-------|
| 152 | Twsg1         | twisted gastrulation homolog 1 (Drosophila)                  | -0.77 |
| 153 | Sqrdl         | sulfide quinone reductase-like (yeast)                       | -0.63 |
| 154 | Rassf3        | Ras association (RalGDS/AF-6) domain family member 3         | -0.76 |
| 155 | Ets2          | E26 avian leukemia oncogene 2, 3' domain                     | -0.99 |
| 156 | Ndrp1         | N-myc downstream regulated gene 1                            | -0.86 |
| 157 | Fam134b       | family with sequence similarity 134, member B                | -0.94 |
| 158 | Dusp16        | dual specificity phosphatase 16                              | -0.74 |
| 159 | Pard6g        | par-6 partitioning defective 6 homolog gamma (C. elegans)    | -0.76 |
| 160 | Atp8a1        | ATPase, aminophospholipid transporter (APLT), class I, type  | -1.04 |
| 161 | Marcks        | myristoylated alanine rich protein kinase C substrate        | -0.78 |
| 162 | Cyb5          | cytochrome b-5                                               | -1.08 |
| 163 | Map4k2        | mitogen-activated protein kinase kinase kinase kinase 2      | -0.86 |
| 164 | Bend5         | BEN domain containing 5                                      | -0.65 |
| 165 | Ctsc          | cathepsin C                                                  | -0.92 |
| 166 | Pip4k2a       | phosphatidylinositol-5-phosphate 4-kinase, type II, alpha    | -0.94 |
| 167 | Dzip1         | DAZ interacting protein 1                                    | -1.06 |
| 168 | Cytip         | cytohesin 1 interacting protein                              | -0.94 |
| 169 | Hspb11        | heat shock protein family B (small), member 11               | -0.89 |
| 170 | Cmah          | cytidine monophospho-N-acetylneuraminic acid hydroxylase     | -0.73 |
| 171 | Irs2          | insulin receptor substrate 2                                 | -0.63 |
| 172 | Irf6          | interferon regulatory factor 6                               | -0.77 |
| 173 | Pde4b         | phosphodiesterase 4B, cAMP specific                          | -0.82 |
| 174 | AI504432      | expressed sequence AI504432                                  | -0.88 |
| 175 | Adamts6       | a disintegrin-like and metallopeptidase (reprolysin type) wi | -0.77 |
| 176 | Myb           | myeloblastosis oncogene                                      | -1.02 |
| 177 | Mfhas1        | malignant fibrous histiocytoma amplified sequence 1          | -0.95 |
| 178 | Tcf4          | transcription factor 4                                       | -0.58 |
| 179 | Rnf19a        | ring finger protein 19A                                      | -0.92 |
| 180 | Mettl8        | methyltransferase like 8                                     | -0.94 |
| 181 | Ssbp2         | single-stranded DNA binding protein 2                        | -0.84 |
| 182 | Mpp1          | membrane protein, palmitoylated                              | -1.03 |
| 183 | Gprc5b        | G protein-coupled receptor, family C, group 5, member B      | -0.74 |
| 184 | Tmem50b       | transmembrane protein 50B                                    | -1.11 |
| 185 | Klf7          | Kruppel-like factor 7 (ubiquitous)                           | -0.77 |
| 186 | Nedd4l        | neural precursor cell expressed, developmentally down-regula | -0.8  |
| 187 | Dag1          | dystroglycan 1                                               | -0.83 |
| 188 | Ppm1h         | protein phosphatase 1H (PP2C domain containing)              | -0.73 |
| 189 | Egr1          | early growth response 1                                      | -0.76 |
| 190 | Slfn5         | schlafen 5                                                   | -0.89 |
| 191 | Tcrg-V1       | T-cell receptor gamma, variable 1                            | -0.67 |
| 192 | Kdm5b         | lysine (K)-specific demethylase 5B                           | -0.8  |
| 193 | Rheb1l        | Ras homolog enriched in brain like 1                         | -0.62 |
| 194 | Tgfr3         | transforming growth factor, beta receptor III                | -0.84 |
| 195 | Dgkd          | diacylglycerol kinase, theta                                 | -0.8  |
| 196 | A930005H10Rik | RIKEN cDNA A930005H10 gene                                   | -0.68 |
| 197 | Scamp1        | secretory carrier membrane protein 1                         | -0.65 |
| 198 | Dirc2         | disrupted in renal carcinoma 2 (human)                       | -0.92 |
| 199 | Scmh1         | sex comb on midleg homolog 1                                 | -0.64 |
| 200 | Ccdc53        | coiled-coil domain containing 53                             | -0.94 |
| 201 | Tnfsf11       | tumor necrosis factor (ligand) superfamily, member 11        | -0.34 |
| 202 | Nfix          | nuclear factor I/X                                           | -0.72 |
| 203 | Tnik          | TRAF2 and NCK interacting kinase                             | -0.76 |
| 204 | Tns1          | tensin 1                                                     | -0.41 |

|     |               |                                                              |       |
|-----|---------------|--------------------------------------------------------------|-------|
| 205 | Dusp6         | dual specificity phosphatase 6                               | -0.97 |
| 206 | Frmd4a        | FERM domain containing 4A                                    | -0.76 |
| 207 | Rab4a         | RAB4A, member RAS oncogene family                            | -0.84 |
| 208 | Tlr1          | toll-like receptor 1                                         | -1.12 |
| 209 | Hivep3        | human immunodeficiency virus type I enhancer binding protein | -0.63 |
| 210 | Eif2ak3       | eukaryotic translation initiation factor 2 alpha kinase 3    | -0.61 |
| 211 | D130062J21Rik | RIKEN cDNA D130062J21 gene                                   | -0.72 |
| 212 | Tpcn1         | two pore channel 1                                           | -0.55 |
| 213 | Rgmb          | RGM domain family, member B                                  | -0.65 |
| 214 | Slc36a4       | solute carrier family 36 (proton/amino acid symporter), memb | -1.01 |
| 215 | Lrrc42        | leucine rich repeat containing 42                            | -0.86 |
| 216 | P2rx4         | purinergic receptor P2X, ligand-gated ion channel 4          | -0.65 |
| 217 | Inpp4b        | inositol polyphosphate-4-phosphatase, type II                | -0.94 |
| 218 | Dph5          | DPH5 homolog (S. cerevisiae)                                 | -0.93 |
| 219 | Pank4         | pantothenate kinase 4                                        | -0.8  |
| 220 | Ptch1         | patched homolog 1                                            | -0.91 |
| 221 | Timeless      | timeless homolog (Drosophila)                                | -0.73 |
| 222 | Bend4         | BEN domain containing 4                                      | -0.85 |
| 223 | Gstm1         | glutathione S-transferase, mu 1                              | -0.51 |
| 224 | Klhdc1        | kelch domain containing 1                                    | -0.92 |
| 225 | Dapk1         | death associated protein kinase 1                            | -0.61 |
| 226 | Kcna2         | potassium voltage-gated channel, shaker-related subfamily, m | -0.68 |
| 227 | Inpp5f        | inositol polyphosphate-5-phosphatase F                       | -0.73 |
| 228 | 2700081O15Rik | RIKEN cDNA 2700081O15 gene                                   | -0.33 |
| 229 | Dck           | deoxycytidine kinase                                         | -1.01 |
| 230 | H2-DMA        | histocompatibility 2, class II, locus DMA                    | -0.76 |
| 231 | Csrp1         | cysteine and glycine-rich protein 1                          | -0.77 |
| 232 | Tfrc          | transferrin receptor                                         | -1.23 |
| 233 | Hspbap1       | Hspb associated protein 1                                    | -0.74 |
| 234 | Cspp1         | centrosome and spindle pole associated protein 1             | -0.84 |
| 235 | Stk38         | serine/threonine kinase 38                                   | -0.64 |
| 236 | Klf3          | Kruppel-like factor 3 (basic)                                | -0.33 |
| 237 | Galnt6        | UDP-N-acetyl-alpha-D-galactosamine:polypeptide N-acetylglac  | -0.66 |
| 238 | Hmgcs1        | 3-hydroxy-3-methylglutaryl-Coenzyme A synthase 1             | -1.05 |
| 239 | Dnajc6        | DnaJ (Hsp40) homolog, subfamily C, member 6                  | -0.52 |
| 240 | Piga          | phosphatidylinositol glycan anchor biosynthesis, class A     | -1.08 |
| 241 | Boll          | bol, boule-like (Drosophila)                                 | -0.8  |
| 242 | Dusp1         | dual specificity phosphatase 1                               | 0.17  |
| 243 | Nsg2          | neuron specific gene family member 2                         | -1.06 |
| 244 | Ccdc28b       | coiled coil domain containing 28B                            | -0.42 |
| 245 | Rps17         | ribosomal protein S17                                        | -1.11 |
| 246 | Oxct1         | 3-oxoacid CoA transferase 1                                  | -0.98 |
| 247 | Plekha1       | pleckstrin homology domain containing, family A (phosphoinos | -0.91 |
| 248 | Tlr12         | toll-like receptor 12                                        | -0.65 |
| 249 | Cnr2          | cannabinoid receptor 2 (macrophage)                          | -1.12 |
| 250 | Ankrd28       | ankyrin repeat domain 28                                     | -0.73 |
| 251 | Daf2          | decay accelerating factor 2                                  | -0.5  |
| 252 | Slc12a7       | solute carrier family 12, member 7                           | -0.74 |
| 253 | Pitpnm2       | phosphatidylinositol transfer protein, membrane-associated 2 | -0.68 |
| 254 | Ccdc126       | coiled-coil domain containing 126                            | -0.74 |
| 255 | Lypd6b        | LY6/PLAUR domain containing 6B                               | -1.01 |
| 256 | Ggta1         | glycoprotein galactosyltransferase alpha 1, 3                | -0.83 |
| 257 | 4932438A13Rik | RIKEN cDNA 4932438A13 gene                                   | -0.68 |

|     |           |                                                              |       |
|-----|-----------|--------------------------------------------------------------|-------|
| 258 | Egr3      | early growth response 3                                      | -0.75 |
| 259 | Tcp11l2   | t-complex 11 (mouse) like 2                                  | -0.68 |
| 260 | Setd7     | SET domain containing (lysine methyltransferase) 7           | -0.72 |
| 261 | Ap1ar     | adaptor-related protein complex 1 associated regulatory prot | -0.81 |
| 262 | Tanc1     | tetratricopeptide repeat, ankyrin repeat and coiled-coil con | -0.6  |
| 263 | Kremen1   | kringle containing transmembrane protein 1                   | -0.6  |
| 264 | Rasgrp1   | RAS guanyl releasing protein 1                               | -0.72 |
| 265 | Eml5      | echinoderm microtubule associated protein like 5             | -0.79 |
| 266 | Ccm2      | cerebral cavernous malformation 2 homolog (human)            | -0.61 |
| 267 | Arhgap29  | Rho GTPase activating protein 29                             | -0.56 |
| 268 | Add3      | adducin 3 (gamma)                                            | -0.57 |
| 269 | Rpl31     | ribosomal protein L31                                        | -1.1  |
| 270 | Sik1      | salt inducible kinase 1                                      | -0.59 |
| 271 | Tmc6      | transmembrane channel-like gene family 6                     | -0.62 |
| 272 | Slc35e2   | solute carrier family 35, member E2                          | -0.83 |
| 273 | Rhoh      | ras homolog gene family, member H                            | -0.62 |
| 274 | Depdc1b   | DEP domain containing 1B                                     | -0.82 |
| 275 | Aldh2     | aldehyde dehydrogenase 2, mitochondrial                      | -0.4  |
| 276 | Rcan3     | regulator of calcineurin 3                                   | -0.6  |
| 277 | Smad1     | MAD homolog 1 (Drosophila)                                   | -0.87 |
| 278 | Casd1     | CAS1 domain containing 1                                     | -0.96 |
| 279 | Cd2ap     | CD2-associated protein                                       | -0.77 |
| 280 | Plcx2     | phosphatidylinositol-specific phospholipase C, X domain cont | -0.75 |
| 281 | Gk5       | glycerol kinase 5 (putative)                                 | -0.63 |
| 282 | Lbh       | limb-bud and heart                                           | -0.71 |
| 283 | Cyp39a1   | cytochrome P450, family 39, subfamily a, polypeptide 1       | -0.32 |
| 284 | Ptpla     | protein tyrosine phosphatase-like (proline instead of cataly | -0.81 |
| 285 | Pole2     | polymerase (DNA directed), epsilon 2 (p59 subunit)           | -0.98 |
| 286 | Zfp36     | zinc finger protein 36                                       | -0.54 |
| 287 | Jarid2    | jumonji, AT rich interactive domain 2                        | -0.66 |
| 288 | Matk      | megakaryocyte-associated tyrosine kinase                     | -0.56 |
| 289 | Pcsk1     | proprotein convertase subtilisin/kexin type 1                | -0.38 |
| 290 | Ypel2     | yippee-like 2 (Drosophila)                                   | -0.45 |
| 291 | Sipa11l   | signal-induced proliferation-associated 1 like 1             | -0.82 |
| 292 | Abl2      | v-abl Abelson murine leukemia viral oncogene homolog 2 (arg, | -0.5  |
| 293 | Fntb      | farnesyltransferase, CAAX box, beta                          | -0.82 |
| 294 | Rtp4      | receptor transporter protein 4                               | -1.19 |
| 295 | Stt3b     | STT3, subunit of the oligosaccharyltransferase complex, homo | -0.84 |
| 296 | Myst4     | MYST histone acetyltransferase monocytic leukemia 4          | -0.58 |
| 297 | Cep68     | centrosomal protein 68                                       | -0.78 |
| 298 | Klhdc2    | kelch domain containing 2                                    | -1.05 |
| 299 | Ifi27l2a  | interferon, alpha-inducible protein 27 like 2A               | -1.06 |
| 300 | Atp6v1d   | ATPase, H+ transporting, lysosomal V1 subunit D              | -0.74 |
| 301 | Eps8l1    | EPS8-like 1                                                  | -0.46 |
| 302 | Slc44a2   | solute carrier family 44, member 2                           | -0.72 |
| 303 | Arrb1     | arrestin, beta 1                                             | -0.74 |
| 304 | Fos       | FBJ osteosarcoma oncogene                                    | 0.11  |
| 305 | Tnfaip8l1 | tumor necrosis factor, alpha-induced protein 8-like 1        | -0.69 |
| 306 | Klf13     | Kruppel-like factor 13                                       | -0.43 |
| 307 | Rictor    | RPTOR independent companion of MTOR, complex 2               | -0.65 |
| 308 | Chd2      | chromodomain helicase DNA binding protein 2                  | -0.51 |
| 309 | Tbcel     | tubulin folding cofactor E-like                              | -0.82 |
| 310 | Ugcg      | UDP-glucose ceramide glucosyltransferase                     | -0.82 |

|     |          |                                                                    |       |
|-----|----------|--------------------------------------------------------------------|-------|
| 311 | Klf2     | Kruppel-like factor 2 (lung)                                       | -0.34 |
| 312 | Slc17a9  | solute carrier family 17, member 9                                 | -0.5  |
| 313 | Txk      | TXK tyrosine kinase                                                | -0.51 |
| 314 | Cux1     | cut-like homeobox 1                                                | -0.37 |
| 315 | Snx13    | sorting nexin 13                                                   | -0.61 |
| 316 | Mettl9   | methyltransferase like 9                                           | -0.8  |
| 317 | Slc30a4  | solute carrier family 30 (zinc transporter), member 4              | -0.68 |
| 318 | Mgat5    | mannoside acetylglucosaminyltransferase 5                          | -0.77 |
| 319 | Orai2    | ORAI calcium release-activated calcium modulator 2                 | -0.52 |
| 320 | Tbxa2r   | thromboxane A2 receptor                                            | -0.7  |
| 321 | Zfp422   | zinc finger protein 422                                            | -0.86 |
| 322 | Snn      | stannin                                                            | -0.31 |
| 323 | Abcc4    | ATP-binding cassette, sub-family C (CFTR/MRP), member 4            | -0.67 |
| 324 | Fnbp1l   | formin binding protein 1-like                                      | -0.39 |
| 325 | Oas2     | 2'-5' oligoadenylate synthetase 2                                  | -0.97 |
| 326 | Jun      | Jun oncogene                                                       | 0.59  |
| 327 | Thada    | thyroid adenoma associated                                         | -0.45 |
| 328 | Cyth1    | cytohesin 1                                                        | -0.37 |
| 329 | Apex1    | apurinic/aprimidinic endonuclease 1                                | -1.05 |
| 330 | Ggt5     | gamma-glutamyltransferase 5                                        | -0.51 |
| 331 | Pik3c2a  | phosphatidylinositol 3-kinase, C2 domain containing, alpha p       | -0.78 |
| 332 | Wdr26    | WD repeat domain 26                                                | -0.5  |
| 333 | Npc2     | Niemann Pick type C2                                               | -0.85 |
| 334 | Nlk      | nemo like kinase                                                   | -0.94 |
| 335 | Tmem108  | transmembrane protein 108                                          | -0.36 |
| 336 | Rasgrp2  | RAS, guanyl releasing protein 2                                    | -0.26 |
| 337 | Cyp2s1   | cytochrome P450, family 2, subfamily s, polypeptide 1              | -0.54 |
| 338 | Sla2     | Src-like-adaptor 2                                                 | -0.7  |
| 339 | Tmeff1   | transmembrane protein with EGF-like and two follistatin-like       | -0.37 |
| 340 | Gnb4     | guanine nucleotide binding protein (G protein), beta 4             | -0.52 |
| 341 | Ikbke    | inhibitor of kappaB kinase epsilon                                 | -0.72 |
| 342 | Ube2h    | ubiquitin-conjugating enzyme E2H                                   | -0.64 |
| 343 | Rnaset2a | ribonuclease T2A                                                   | -0.51 |
| 344 | Zfp281   | zinc finger protein 281                                            | -0.89 |
| 345 | Cd69     | CD69 antigen                                                       | -0.72 |
| 346 | Arid5b   | AT rich interactive domain 5B (MRF1-like)                          | -0.46 |
| 347 | Wdr12    | WD repeat domain 12                                                | -0.78 |
| 348 | Dyrk2    | dual-specificity tyrosine-(Y)-phosphorylation regulated kina       | -0.62 |
| 349 | Gch1     | GTP cyclohydrolase 1                                               | -0.55 |
| 350 | Ube2r2   | ubiquitin-conjugating enzyme E2R 2                                 | -0.68 |
| 351 | Dpp4     | dipeptidylpeptidase 4                                              | -0.83 |
| 352 | Trim59   | tripartite motif-containing 59                                     | -0.77 |
| 353 | Fam65b   | family with sequence similarity 65, member B                       | -0.51 |
| 354 | Camk4    | calcium/calmodulin-dependent protein kinase IV                     | -0.74 |
| 355 | Ppm1l    | protein phosphatase 1 (formerly 2C)-like                           | -0.26 |
| 356 | Adam6b   | a disintegrin and metallopeptidase domain 6B                       | -0.67 |
| 357 | Atp6ap2  | ATPase, H <sup>+</sup> transporting, lysosomal accessory protein 2 | -0.95 |
| 358 | Tgfr1    | transforming growth factor, beta receptor I                        | -0.66 |
| 359 | Cep57l1  | centrosomal protein 57-like 1                                      | -0.85 |
| 360 | Tlr7     | toll-like receptor 7                                               | -0.96 |
| 361 | Cd79b    | CD79B antigen                                                      | -0.59 |
| 362 | Camk2d   | calcium/calmodulin-dependent protein kinase II, beta               | -0.53 |
| 363 | Cnga1    | cyclic nucleotide gated channel alpha 1                            | -0.8  |

|     |               |                                                              |       |
|-----|---------------|--------------------------------------------------------------|-------|
| 364 | Kcna3         | potassium voltage-gated channel, shaker-related subfamily, m | -0.48 |
| 365 | Mtap7         | microtubule-associated protein 7                             | -0.46 |
| 366 | Atxn10        | ataxin 10                                                    | -0.76 |
| 367 | Dnahc8        | dynein, axonemal, heavy chain 8                              | -0.49 |
| 368 | Prps1         | phosphoribosyl pyrophosphate synthetase 1                    | -0.72 |
| 369 | Usp3          | ubiquitin specific peptidase 3                               | -0.51 |
| 370 | Abtb2         | ankyrin repeat and BTB (POZ) domain containing 2             | -0.75 |
| 371 | Rbm33         | RNA binding motif protein 33                                 | -0.49 |
| 372 | Tfdp2         | transcription factor Dp 2                                    | -0.59 |
| 373 | Minpp1        | multiple inositol polyphosphate histidine phosphatase 1      | -0.73 |
| 374 | Acsf2         | acyl-CoA synthetase family member 2                          | -0.74 |
| 375 | 1700017B05Rik | RIKEN cDNA 1700017B05 gene                                   | -0.4  |
| 376 | Sft2d2        | SFT2 domain containing 2                                     | -0.66 |
| 377 | Zbtb20        | zinc finger and BTB domain containing 20                     | -0.61 |
| 378 | Trp53inp1     | transformation related protein 53 inducible nuclear protein  | -0.69 |
| 379 | Trim25        | tripartite motif-containing 25                               | -0.85 |
| 380 | Bdh1          | 3-hydroxybutyrate dehydrogenase, type 1                      | -0.68 |
| 381 | Phtf2         | putative homeodomain transcription factor 2                  | -0.85 |
| 382 | Znrf1         | zinc and ring finger 1                                       | -0.61 |
| 383 | Fbxo32        | F-box protein 32                                             | -0.52 |
| 384 | A630038E17Rik | RIKEN cDNA A630038E17 gene                                   | -0.31 |
| 385 | Ube2d2        | ubiquitin-conjugating enzyme E2D 2                           | -0.55 |
| 386 | Ndrp2         | N-myc downstream regulated gene 2                            | -0.52 |
| 387 | Frat2         | frequently rearranged in advanced T-cell lymphomas 2         | -0.31 |
| 388 | Gramd4        | GRAM domain containing 4                                     | -0.43 |
| 389 | Abcg2         | ATP-binding cassette, sub-family G (WHITE), member 2         | -0.56 |
| 390 | Ttc27         | tetratricopeptide repeat domain 27                           | -0.84 |
| 391 | Pag1          | phosphoprotein associated with glycosphingolipid microdomain | -0.61 |
| 392 | Tsc22d3       | TSC22 domain family, member 3                                | -0.17 |
| 393 | 37680         | membrane-associated ring finger (C3HC4) 7                    | -0.6  |
| 394 | Sorcs2        | sortilin-related VPS10 domain containing receptor 2          | -0.34 |
| 395 | Ralb          | v-ral simian leukemia viral oncogene homolog B (ras related) | -0.49 |
| 396 | Zfp354c       | zinc finger protein 354C                                     | -0.55 |
| 397 | Zeb1          | zinc finger E-box binding homeobox 1                         | -0.56 |
| 398 | Mapk8         | mitogen-activated protein kinase 8                           | -0.67 |
| 399 | Thra          | thyroid hormone receptor alpha                               | -0.52 |
| 400 | Rcsd1         | RCSL domain containing 1                                     | -0.56 |
| 401 | Clcf1         | cardiotrophin-like cytokine factor 1                         | -0.56 |
| 402 | Prps2         | phosphoribosyl pyrophosphate synthetase 2                    | -0.92 |
| 403 | Ehd1          | EH-domain containing 1                                       | -1.09 |
| 404 | Mcoln3        | mucopolipin 3                                                | -0.72 |
| 405 | BC057079      | cDNA sequence BC057079                                       | -0.65 |
| 406 | 4933439F18Rik | RIKEN cDNA 4933439F18 gene                                   | -0.86 |
| 407 | Lamp2         | lysosomal-associated membrane protein 2                      | -0.74 |
| 408 | Sema4b        | sema domain, immunoglobulin domain (Ig), transmembrane domai | -0.58 |
| 409 | Arhgap39      | Rho GTPase activating protein 39                             | -0.69 |
| 410 | Lrrc1         | leucine rich repeat containing 1                             | -0.61 |
| 411 | Slc35b3       | solute carrier family 35, member B3                          | -0.88 |
| 412 | Ldlr          | low density lipoprotein receptor                             | -0.62 |
| 413 | Cenpa         | centromere protein A                                         | -0.55 |
| 414 | Gltp          | glycolipid transfer protein                                  | -0.71 |
| 415 | Dgka          | diacylglycerol kinase, alpha                                 | -0.57 |
| 416 | Fry           | furry homolog (Drosophila)                                   | -0.44 |



|     |           |                                                             |       |
|-----|-----------|-------------------------------------------------------------|-------|
| 417 | Fam3c     | family with sequence similarity 3, member C                 | -0.71 |
| 418 | Tbl1x     | transducin (beta)-like 1 X-linked                           | -0.77 |
| 419 | Ddx60     | DEAD (Asp-Glu-Ala-Asp) box polypeptide 60                   | -0.77 |
| 420 | Dhx40     | DEAH (Asp-Glu-Ala-His) box polypeptide 40                   | -0.35 |
| 421 | Add1      | adducin 1 (alpha)                                           | -0.55 |
| 422 | Top2b     | topoisomerase (DNA) II beta                                 | -0.46 |
| 423 | Sall2     | sal-like 2 (Drosophila)                                     | -0.29 |
| 424 | Rsad2     | radical S-adenosyl methionine domain containing 2           | -0.85 |
| 425 | Appl2     | adaptor protein, phosphotyrosine interaction, PH domain and | -0.8  |
| 426 | Ssbp3     | single-stranded DNA binding protein 3                       | -0.52 |
| 427 | Slc25a27  | solute carrier family 25, member 27                         | -0.4  |
| 428 | Camsap111 | calmodulin regulated spectrin-associated protein 1-like 1   | -0.39 |
| 429 | Rnf144a   | ring finger protein 144A                                    | -0.42 |
| 430 | Tdrkh     | tudor and KH domain containing protein                      | -0.57 |
| 431 | Rps6ka2   | ribosomal protein S6 kinase, polypeptide 2                  | -0.39 |
| 432 | Nucb2     | nucleobindin 2                                              | -0.45 |
| 433 | Btla      | B and T lymphocyte associated                               | -0.75 |
| 434 | Lrp6      | low density lipoprotein receptor-related protein 6          | -0.48 |
| 435 | Hsd11     | hydroxysteroid dehydrogenase like 1                         | -0.73 |
| 436 | Kras      | v-Ki-ras2 Kirsten rat sarcoma viral oncogene homolog        | -0.7  |
| 437 | Bace1     | beta-site APP cleaving enzyme 1                             | -0.83 |
| 438 | Pdim1     | PDZ and LIM domain 1 (elfin)                                | -0.42 |
| 439 | Tuba1b    | tubulin, alpha 1B                                           | -0.73 |
| 440 | Setx      | senataxin                                                   | -0.63 |
| 441 | Qprt      | quinolinate phosphoribosyltransferase                       | -0.28 |
| 442 | Btf3l4    | basic transcription factor 3-like 4                         | -0.76 |
| 443 | Mcm7      | minichromosome maintenance deficient 7 (S. cerevisiae)      | -0.66 |
| 444 | Insig1    | insulin induced gene 1                                      | -0.64 |
| 445 | Lpcat3    | lysophosphatidylcholine acyltransferase 3                   | -0.66 |
| 446 | Map4k4    | mitogen-activated protein kinase kinase kinase kinase 4     | -0.6  |
| 447 | Ddit4     | DNA-damage-inducible transcript 4                           | -0.87 |
| 448 | Crlf3     | cytokine receptor-like factor 3                             | -0.5  |
| 449 | Maoa      | monoamine oxidase A                                         | -0.29 |
| 450 | Dopey1    | dopey family member 1                                       | -0.56 |
| 451 | Fxyd7     | FXYP domain-containing ion transport regulator 7            | -0.21 |
| 452 | Folr4     | folate receptor 4 (delta)                                   | -0.45 |
| 453 | Il21r     | interleukin 21 receptor                                     | -0.55 |
| 454 | Rnf145    | ring finger protein 145                                     | -0.67 |
| 455 | Angptl1   | angiopoietin-like 1                                         | -0.37 |
| 456 | Bhlhb9    | basic helix-loop-helix domain containing, class B9          | -0.7  |
| 457 | Rragd     | Ras-related GTP binding D                                   | -0.42 |
| 458 | Tmem120b  | transmembrane protein 120B                                  | -0.36 |
| 459 | Fbxl20    | F-box and leucine-rich repeat protein 20                    | -0.56 |
| 460 | Peli1     | pellino 1                                                   | -0.67 |
| 461 | Tuba1a    | tubulin, alpha 1A                                           | -0.47 |
| 462 | Pcbp3     | poly(rC) binding protein 3                                  | -0.18 |
| 463 | Scaper    | S phase cyclin A-associated protein in the ER               | -0.5  |
| 464 | Ccdc109b  | coiled-coil domain containing 109B                          | -0.31 |
| 465 | Cdk2      | cyclin-dependent kinase 2                                   | -0.39 |
| 466 | Suv39h1   | suppressor of variegation 3-9 homolog 1 (Drosophila)        | -0.58 |
| 467 | Kif3a     | kinesin family member 3A                                    | -0.27 |
| 468 | Tor1aip2  | torsin A interacting protein 2                              | -0.72 |
| 469 | Tet3      | tet oncogene family member 3                                | -0.5  |

|     |               |                                                                                                          |       |
|-----|---------------|----------------------------------------------------------------------------------------------------------|-------|
| 470 | Kcnn4         | potassium intermediate/small conductance calcium-activated c                                             | -0.58 |
| 471 | Zdhhc20       | zinc finger, DHHC domain containing 11                                                                   | -0.73 |
| 472 | Nhsl1         | NHS-like 1                                                                                               | -0.37 |
| 473 | Pdgfrb        | platelet derived growth factor receptor, beta polypeptide                                                | -0.19 |
| 474 | 2810410L24Rik | RIKEN cDNA 2810410L24 gene                                                                               | -0.13 |
| 475 | Fam169b       | family with sequence similarity 169, member B                                                            | -0.83 |
| 476 | Pnpla8        | patatin-like phospholipase domain containing 8                                                           | -0.63 |
| 477 | Ppm1b         | protein phosphatase 1B, magnesium dependent, beta isoform                                                | -0.66 |
| 478 | Tmem131       | transmembrane protein 131                                                                                | -0.54 |
| 479 | Tnfrsf13b     | tumor necrosis factor receptor superfamily, member 13b                                                   | -0.49 |
| 480 | Pcgf5         | polycomb group ring finger 5                                                                             | -0.74 |
| 481 | Dip2b         | DIP2 disco-interacting protein 2 homolog B (Drosophila)                                                  | -0.46 |
| 482 | Fads1         | fatty acid desaturase 1                                                                                  | -0.64 |
| 483 | Grk6          | G protein-coupled receptor kinase 6                                                                      | -0.58 |
| 484 | Gpatch8       | G patch domain containing 8                                                                              | -0.7  |
| 485 | Lrig1         | leucine-rich repeats and immunoglobulin-like domains 1                                                   | -0.51 |
| 486 | Itk           | IL2-inducible T-cell kinase                                                                              | -0.05 |
| 487 | Ager          | advanced glycosylation end product-specific receptor                                                     | -0.11 |
| 488 | Smad4         | MAD homolog 4 (Drosophila)                                                                               | -0.49 |
| 489 | Csrnp2        | cysteine-serine-rich nuclear protein 2                                                                   | -0.44 |
| 490 | Ube4b         | ubiquitination factor E4B, UFD2 homolog (S. cerevisiae)                                                  | -0.43 |
| 491 | Mid1          | midline 1                                                                                                | -0.58 |
| 492 | Arf2          | ADP-ribosylation factor 2                                                                                | -0.33 |
| 493 | Akap13        | A kinase (PRKA) anchor protein 13                                                                        | -0.25 |
| 494 | Tmem86a       | transmembrane protein 86A                                                                                | -0.18 |
| 495 | Zfp238        | zinc finger protein 238                                                                                  | -0.7  |
| 496 | D18Ert653e    | DNA segment, Chr 18, ERATO Doi 653, expressed                                                            | -0.46 |
| 497 | Bzw2          | basic leucine zipper and W2 domains 2<br>membrane protein, palmitoylated 7 (MAGUK p55 subfamily<br>membe | -0.54 |
| 498 | Mpp7          |                                                                                                          | -0.6  |
| 499 | Tubb3         | tubulin, beta 3                                                                                          | -0.22 |
| 500 | Rnf213        | ring finger protein 213                                                                                  | -0.68 |
| 501 | Tubb5         | tubulin, beta 5                                                                                          | -0.59 |
| 502 | Osbpl8        | oxysterol binding protein-like 8                                                                         | -0.57 |
| 503 | Pde3b         | phosphodiesterase 3B, cGMP-inhibited                                                                     | -0.76 |
| 504 | Tmem57        | transmembrane protein 57                                                                                 | -0.49 |
| 505 | Ralgps1       | Ral GEF with PH domain and SH3 binding motif 1                                                           | -0.43 |
| 506 | Mbtd1         | mbt domain containing 1                                                                                  | -0.55 |
| 507 | Plscr3        | phospholipid scramblase 3                                                                                | -0.55 |
| 508 | Phf2011       | PHD finger protein 20-like 1                                                                             | -0.46 |
| 509 | Pgpep11       | pyroglutamyl-peptidase I-like                                                                            | -0.45 |
| 510 | Sesn3         | sestrin 3                                                                                                | -0.76 |
| 511 | Vamp1         | vesicle-associated membrane protein 1                                                                    | -0.48 |
| 512 | 5830411N06Rik | RIKEN cDNA 5830411N06 gene                                                                               | -0.42 |
| 513 | Klhl24        | kelch-like 24 (Drosophila)                                                                               | -0.61 |
| 514 | Txnrd3        | thioredoxin reductase 3                                                                                  | -0.36 |
| 515 | Sbk1          | SH3-binding kinase 1                                                                                     | -0.48 |
| 516 | 2510009E07Rik | RIKEN cDNA 2510009E07 gene                                                                               | -0.22 |
| 517 | Mical3        | microtubule associated monooxygenase, calponin and LIM domain                                            | -0.45 |
| 518 | Tnfrsf14      | tumor necrosis factor receptor superfamily, member 14 (herpe                                             | -0.48 |
| 519 | Celsr2        | cadherin, EGF LAG seven-pass G-type receptor 2 (flamingo hom                                             | -0.28 |
| 520 | Ptk2          | PTK2 protein tyrosine kinase 2                                                                           | -0.33 |
| 521 | Osbpl9        | oxysterol binding protein-like 9                                                                         | -0.55 |

|     |               |                                                                                  |       |
|-----|---------------|----------------------------------------------------------------------------------|-------|
| 522 | Zfp318        | zinc finger protein 318                                                          | -0.62 |
| 523 | Glb1          | galactosidase, beta 1                                                            | -0.44 |
| 524 | Phlpp1        | PH domain and leucine rich repeat protein phosphatase 1                          | -0.36 |
| 525 | Rassf2        | Ras association (RalGDS/AF-6) domain family member 2                             | -0.51 |
| 526 | Egln3         | EGL nine homolog 3 (C. elegans)                                                  | -0.6  |
| 527 | Pepd          | peptidase D                                                                      | -0.71 |
| 528 | Ccnjl         | cyclin J-like<br>membrane associated guanylate kinase, WW and PDZ domain<br>cont | -0.32 |
| 529 | Magi3         |                                                                                  | -0.47 |
| 530 | Prickle1      | prickle homolog 1 (Drosophila)                                                   | -0.34 |
| 531 | Mast4         | microtubule associated serine/threonine kinase family member                     | -0.35 |
| 532 | Snx30         | sorting nexin family member 30                                                   | -0.36 |
| 533 | 3110057O12Rik | RIKEN cDNA 3110057O12 gene                                                       | -0.55 |
| 534 | Slc25a23      | solute carrier family 25 (mitochondrial carrier; phosphate c                     | -0.33 |
| 535 | Lif           | leukemia inhibitory factor                                                       | -0.11 |
| 536 | Gbp6          | guanylate binding protein 6                                                      | -0.78 |
| 537 | Msrb2         | methionine sulfoxide reductase B2                                                | -0.34 |
| 538 | Srpk2         | serine/arginine-rich protein specific kinase 2                                   | -0.46 |
| 539 | Slc44a1       | solute carrier family 44, member 1                                               | -0.41 |
| 540 | Stx2          | syntaxin 2                                                                       | -0.7  |
| 541 | Rab6b         | RAB6B, member RAS oncogene family                                                | -0.43 |
| 542 | Smc6          | structural maintenance of chromosomes 6                                          | -0.67 |
| 543 | 6720463M24Rik | RIKEN cDNA 6720463M24 gene                                                       | -0.59 |
| 544 | Itpr2         | inositol 1,4,5-triphosphate receptor 2                                           | -0.22 |
| 545 | Abcc5         | ATP-binding cassette, sub-family C (CFTR/MRP), member 5                          | -0.39 |
| 546 | Zdhhc17       | zinc finger, DHHC domain containing 17                                           | -0.56 |
| 547 | Mcmbp         | MCM (minichromosome maintenance deficient) binding protein                       | -0.48 |
| 548 | Med13l        | mediator complex subunit 13-like                                                 | -0.35 |
| 549 | Spata6        | spermatogenesis associated 6                                                     | -0.58 |
| 550 | Setd1b        | SET domain containing 1B                                                         | -0.14 |
| 551 | Patz1         | POZ (BTB) and AT hook containing zinc finger 1                                   | -0.51 |
| 552 | Asah2         | N-acylsphingosine amidohydrolase 2                                               | -0.43 |
| 553 | Znrf3         | zinc and ring finger 3                                                           | -0.4  |
| 554 | Csrnp1        | cysteine-serine-rich nuclear protein 1                                           | -0.4  |
| 555 | Rev3l         | REV3-like, catalytic subunit of DNA polymerase zeta RAD54 li                     | -0.61 |
| 556 | Gbp2          | guanylate binding protein 2                                                      | -0.56 |
| 557 | Arnt          | aryl hydrocarbon receptor nuclear translocator                                   | -0.46 |
| 558 | Dhcr24        | 24-dehydrocholesterol reductase                                                  | -0.52 |
| 559 | Gtf2i         | general transcription factor II I                                                | -0.09 |
| 560 | Msh6          | mutS homolog 6 (E. coli)                                                         | -0.62 |
| 561 | Fam65a        | family with sequence similarity 65, member A                                     | -0.21 |
| 562 | Cyp51         | cytochrome P450, family 51                                                       | -0.66 |
| 563 | Zcchc12       | zinc finger, CCHC domain containing 12                                           | -0.27 |
| 564 | Msi2          | Musashi homolog 2 (Drosophila)                                                   | -0.51 |
| 565 | Pogz          | pogo transposable element with ZNF domain                                        | -0.61 |
| 566 | Zfp286        | zinc finger protein 286                                                          | -0.38 |
| 567 | Vangl2        | vang-like 2 (van gogh, Drosophila)                                               | -0.25 |
| 568 | Fam158a       | family with sequence similarity 158, member A                                    | -0.59 |
| 569 | Lrrc8a        | leucine rich repeat containing 8A                                                | -0.45 |
| 570 | Ndrp3         | N-myc downstream regulated gene 3                                                | -0.48 |
| 571 | Hmgn1         | high mobility group nucleosomal binding domain 1                                 | -0.45 |
| 572 | Syde1         | synapse defective 1, Rho GTPase, homolog 1 (C. elegans)                          | -0.45 |
| 573 | Vps37b        | vacuolar protein sorting 37B (yeast)                                             | -0.54 |

|     |               |                                                              |       |
|-----|---------------|--------------------------------------------------------------|-------|
| 574 | Asap1         | ArfGAP with SH3 domain, ankyrin repeat and PH domain1        | -0.68 |
| 575 | Mlec          | malectin                                                     | -0.43 |
| 576 | Ece2          | endothelin converting enzyme 2                               | -0.71 |
| 577 | Parp9         | poly (ADP-ribose) polymerase family, member 9                | -0.7  |
| 578 | Chd6          | chromodomain helicase DNA binding protein 6                  | -0.47 |
| 579 | Nsmce1        | non-SMC element 1 homolog (S. cerevisiae)                    | -0.4  |
| 580 | Nfkbiz        | nuclear factor of kappa light polypeptide gene enhancer in B | -0.16 |
| 581 | Prkch         | protein kinase C, eta                                        | -0.7  |
| 582 | Cenpj         | centromere protein J                                         | -0.53 |
| 583 | B630005N14Rik | RIKEN cDNA B630005N14 gene                                   | -0.7  |
| 584 | Znrf2         | zinc and ring finger 2                                       | -0.31 |
| 585 | Fbxl3         | F-box and leucine-rich repeat protein 3                      | -0.44 |
| 586 | Plac8         | placenta-specific 8                                          | -0.27 |
| 587 | Ighm          | immunoglobulin heavy constant mu                             | -0.22 |
| 588 | Rapgef6       | Rap guanine nucleotide exchange factor (GEF) 6               | -0.58 |
| 589 | Wnt5b         | wingless-related MMTV integration site 5B                    | -0.2  |
| 590 | Ano6          | anoctamin 6                                                  | -0.4  |
| 591 | Arhgap15      | Rho GTPase activating protein 15                             | -0.21 |
| 592 | Zfp386        | zinc finger protein 386 (Kruppel-like)                       | -0.45 |
| 593 | Numb          | numb gene homolog (Drosophila)                               | -0.59 |
| 594 | Brms1l        | breast cancer metastasis-suppressor 1-like                   | -0.76 |
| 595 | Irf9          | interferon regulatory factor 9                               | -0.62 |
| 596 | Rmnd5a        | required for meiotic nuclear division 5 homolog A (S. cerevi | -0.57 |
| 597 | Lpp           | LIM domain containing preferred translocation partner in lip | -0.57 |
| 598 | Irgm2         | immunity-related GTPase family M member 2                    | -0.88 |
| 599 | Ezr           | ezrin                                                        | -0.39 |
| 600 | Rhoa          | ras homolog gene family, member A                            | -0.4  |
| 601 | Siah1a        | seven in absentia 1A                                         | -0.63 |
| 602 | Mbnl2         | muscleblind-like 2                                           | -0.66 |
| 603 | Acpp          | acid phosphatase, prostate                                   | -0.65 |
| 604 | Larp4         | La ribonucleoprotein domain family, member 4                 | -0.72 |
| 605 | Tmem71        | transmembrane protein 71                                     | -0.41 |
| 606 | Hook1         | hook homolog 1 (Drosophila)                                  | -0.74 |
| 607 | Iigp1         | interferon inducible GTPase 1                                | -0.75 |
| 608 | Pcca          | propionyl-Coenzyme A carboxylase, alpha polypeptide          | -0.59 |
| 609 | Glcci1        | glucocorticoid induced transcript 1                          | -0.44 |
| 610 | Pld3          | phospholipase D family, member 3                             | -0.38 |
| 611 | Fnip1         | folliculin interacting protein 1                             | -0.62 |
| 612 | Rere          | arginine glutamic acid dipeptide (RE) repeats                | -0.44 |
| 613 | Gm885         | predicted gene 885                                           | -0.81 |
| 614 | A230046K03Rik | RIKEN cDNA A230046K03 gene                                   | -0.66 |
| 615 | Atxn2         | ataxin 2                                                     | -0.61 |
| 616 | Pbx2          | pre B-cell leukemia transcription factor 2                   | -0.33 |
| 617 | Dcaf6         | DDB1 and CUL4 associated factor 6                            | -0.41 |
| 618 | Tcf12         | transcription factor 12                                      | -0.62 |
| 619 | Hpcal1        | hippocalcin-like 1                                           | -0.44 |
| 620 | Ipcef1        | interaction protein for cytohesin exchange factors 1         | -0.51 |
| 621 | Cnst          | consortin, connexin sorting protein                          | -0.48 |
| 622 | Pde6d         | phosphodiesterase 6D, cGMP-specific, rod, delta              | -0.43 |
| 623 | Lactb         | lactamase, beta                                              | -0.67 |
| 624 | Mpzl1         | myelin protein zero-like 1                                   | -0.12 |
| 625 | Mpp5          | membrane protein, palmitoylated 5 (MAGUK p55 subfamily membe | -0.47 |

|     |               |                                                                                       |       |
|-----|---------------|---------------------------------------------------------------------------------------|-------|
| 626 | Arid4a        | AT rich interactive domain 4A (RBP1-like)                                             | -0.58 |
| 627 | Strbp         | spermatid perinuclear RNA binding protein                                             | -0.69 |
| 628 | Zyg11b        | zyg-II homolog B ( <i>C. elegans</i> )                                                | -0.41 |
| 629 | Lphn1         | latrophilin 1                                                                         | -0.34 |
| 630 | Igsf3         | immunoglobulin superfamily, member 3                                                  | -0.19 |
| 631 | Ptov1         | prostate tumor over expressed gene 1                                                  | -0.17 |
| 632 | Dlg3          | discs, large homolog 3 ( <i>Drosophila</i> )                                          | -0.29 |
| 633 | Etnk1         | ethanolamine kinase 1                                                                 | -0.66 |
| 634 | Cdc14b        | CDC14 cell division cycle 14 homolog B ( <i>S. cerevisiae</i> )                       | -0.53 |
| 635 | Ablim1        | actin-binding LIM protein 1                                                           | -0.4  |
| 636 | Kcnj16        | potassium inwardly-rectifying channel, subfamily J, member 1                          | -0.16 |
| 637 | Brip1         | BRCA1 interacting protein C-terminal helicase 1                                       | -0.33 |
| 638 | Atp13a3       | ATPase type 13A3                                                                      | -0.57 |
| 639 | Zfp516        | zinc finger protein 516                                                               | -0.31 |
| 640 | Tbc1d15       | TBC1 domain family, member 15                                                         | -0.55 |
| 641 | Ccdc28a       | coiled-coil domain containing 28A                                                     | -0.55 |
| 642 | Slc11a2       | solute carrier family 11 (proton-coupled divalent metal ion                           | -0.55 |
| 643 | Wdr46         | WD repeat domain 46                                                                   | -0.49 |
| 644 | Atp6v0d1      | ATPase, H <sup>+</sup> transporting, lysosomal V0 subunit D1                          | -0.51 |
| 645 | Cep350        | centrosomal protein 350                                                               | -0.33 |
| 646 | Itga5         | integrin alpha 5 (fibronectin receptor alpha)                                         | -0.24 |
| 647 | Abl1          | c-abl oncogene 1, non-receptor tyrosine kinase                                        | -0.47 |
| 648 | Rps6ka5       | ribosomal protein S6 kinase, polypeptide 5                                            | -0.38 |
| 649 | Pccb          | propionyl Coenzyme A carboxylase, beta polypeptide                                    | -0.41 |
| 650 | Hbp1          | high mobility group box transcription factor 1                                        | -0.52 |
| 651 | Smchd1        | SMC hinge domain containing 1                                                         | -0.65 |
| 652 | Eef2k         | eukaryotic elongation factor-2 kinase                                                 | -0.42 |
| 653 | Sh3bp5        | SH3-domain binding protein 5 (BTK-associated)                                         | -0.35 |
| 654 | Men1          | multiple endocrine neoplasia 1                                                        | -0.37 |
| 655 | Ctse          | cathepsin E                                                                           | 0.11  |
| 656 | Gpd2          | glucose-6-phosphate dehydrogenase 2                                                   | -0.33 |
| 657 | Eif4e3        | eukaryotic translation initiation factor 4E member 3                                  | -0.26 |
| 658 | Ascc3         | activating signal cointegrator 1 complex subunit 3                                    | -0.39 |
| 659 | Tnrc6c        | trinucleotide repeat containing 6C                                                    | -0.43 |
| 660 | Cep170        | centrosomal protein 170                                                               | -0.51 |
| 661 | Idi1          | isopentenyl-diphosphate delta isomerase                                               | -0.99 |
| 662 | Trpm7         | transient receptor potential cation channel, subfamily M, me                          | -0.49 |
| 663 | Rcor1         | REST corepressor 2<br>membrane protein, palmitoylated 6 (MAGUK p55 subfamily<br>membe | -0.59 |
| 664 | Mpp6          |                                                                                       | -0.56 |
| 665 | Calcoco1      | calcium binding and coiled coil domain 1                                              | -0.24 |
| 666 | Cox7a2l       | cytochrome c oxidase subunit VIIa polypeptide 2-like                                  | -0.44 |
| 667 | Spo11         | sporulation protein, meiosis-specific, SPO11 homolog ( <i>S. cer</i>                  | -0.62 |
| 668 | Glo1          | glyoxalase 1                                                                          | -0.72 |
| 669 | Smad5         | MAD homolog 5 ( <i>Drosophila</i> )                                                   | -0.49 |
| 670 | Arhgef1       | Rho guanine nucleotide exchange factor (GEF) 1                                        | -0.1  |
| 671 | Polg2         | polymerase (DNA directed), gamma 2, accessory subunit                                 | -0.55 |
| 672 | Hdac5         | histone deacetylase 5                                                                 | -0.44 |
| 673 | 4632428N05Rik | RIKEN cDNA 4632428N05 gene                                                            | -0.46 |
| 674 | Akap2         | A kinase (PRKA) anchor protein 2                                                      | -0.34 |
| 675 | Il1rl2        | interleukin 1 receptor-like 2                                                         | -0.57 |
| 676 | Senp7         | SUMO1/sentrin specific peptidase 7                                                    | -0.38 |
| 677 | Tex2          | testis expressed gene 2                                                               | -0.6  |

|     |           |                                                              |       |
|-----|-----------|--------------------------------------------------------------|-------|
| 678 | Slfn10-ps | schlafen 10, pseudogene                                      | -0.4  |
| 679 | Atp11c    | ATPase, class VI, type 11C                                   | -0.61 |
| 680 | Narg2     | NMDA receptor-regulated gene 2                               | -0.71 |
| 681 | Sos1      | son of sevenless homolog 1 (Drosophila)                      | -0.45 |
| 682 | Oasl2     | 2'-5' oligoadenylate synthetase-like 2                       | -0.74 |
| 683 | Ly75      | lymphocyte antigen 75                                        | -0.59 |
| 684 | H2afv     | H2A histone family, member V                                 | -0.49 |
| 685 | Nme4      | non-metastatic cells 4, protein expressed in                 | -0.52 |
| 686 | Aff4      | AF4/FMR2 family, member 4                                    | -0.34 |
| 687 | Emb       | embigin                                                      | -0.51 |
| 688 | Jmy       | junction-mediating and regulatory protein                    | -0.49 |
| 689 | Hmgcr     | 3-hydroxy-3-methylglutaryl-Coenzyme A reductase              | -0.65 |
| 690 | Akap12    | A kinase (PRKA) anchor protein (gravin) 12                   | -0.45 |
| 691 | Nasp      | nuclear autoantigenic sperm protein (histone-binding)        | -0.63 |
| 692 | Ctss      | cathepsin S                                                  | -0.89 |
| 693 | Vipr1     | vasoactive intestinal peptide receptor 1                     | -0.54 |
| 694 | Parp11    | poly (ADP-ribose) polymerase family, member 11               | -0.7  |
| 695 | Rcc2      | regulator of chromosome condensation 2                       | -0.56 |
| 696 | Ccdc22    | coiled-coil domain containing 22                             | -0.47 |
| 697 | Zfp407    | zinc finger protein 407                                      | -0.47 |
| 698 | Ccng2     | cyclin G2                                                    | -0.56 |
| 699 | Rbbp6     | retinoblastoma binding protein 6                             | -0.48 |
| 700 | Stat5a    | signal transducer and activator of transcription 5A          | -0.42 |
| 701 | Cd247     | CD247 antigen                                                | -0.1  |
| 702 | Suv420h1  | suppressor of variegation 4-20 homolog 1 (Drosophila)        | -0.4  |
| 703 | Slc15a2   | solute carrier family 15 (H+/peptide transporter), member 2  | -0.82 |
| 704 | Mll3      | myeloid/lymphoid or mixed-lineage leukemia 3                 | -0.21 |
| 705 | Lman2l    | lectin, mannose-binding 2-like                               | -0.59 |
| 706 | Upf2      | UPF2 regulator of nonsense transcripts homolog (yeast)       | -0.58 |
| 707 | Zfand5    | zinc finger, AN1-type domain 5                               | -0.58 |
| 708 | Uck2      | uridine-cytidine kinase 2                                    | -0.47 |
| 709 | Gpsm2     | G-protein signalling modulator 2 (AGS3-like, C. elegans)     | -0.52 |
| 710 | Cd53      | CD53 antigen                                                 | -0.47 |
| 711 | Limk2     | LIM motif-containing protein kinase 2                        | -0.41 |
| 712 | Ncapd3    | non-SMC condensin II complex, subunit D3                     | -0.55 |
| 713 | Gm7120    | predicted gene 7120                                          | -0.48 |
| 714 | Utrn      | utrophin                                                     | -0.08 |
| 715 | Inpp5a    | inositol polyphosphate-5-phosphatase A                       | -0.45 |
| 716 | Rasgrf2   | RAS protein-specific guanine nucleotide-releasing factor 2   | -0.47 |
| 717 | Flot2     | flotillin 2                                                  | -0.35 |
| 718 | Sqle      | squalene epoxidase                                           | -0.6  |
| 719 | Lmbr1l    | limb region 1 like                                           | -0.26 |
| 720 | Arl5b     | ADP-ribosylation factor-like 5B                              | -0.57 |
| 721 | Cd1d1     | CD1d1 antigen                                                | -0.56 |
| 722 | Lmo4      | LIM domain only 4                                            | -0.38 |
| 723 | Ctnnbl1   | catenin, beta like 1                                         | -0.48 |
| 724 | Tubb2c    | tubulin, beta 2C                                             | -0.38 |
| 725 | Gabbr2    | gamma-aminobutyric acid (GABA) C receptor, subunit rho 2     | -0.36 |
| 726 | Slc25a5   | solute carrier family 25 (mitochondrial carrier, adenine nuc | -0.83 |
| 727 | Stk3      | serine/threonine kinase 3 (Ste20, yeast homolog)             | -0.21 |
| 728 | Gtf2ird2  | GTF2I repeat domain containing 2                             | -0.33 |
| 729 | Pdk2      | pyruvate dehydrogenase kinase, isoenzyme 2                   | -0.22 |
| 730 | Art4      | ADP-ribosyltransferase 4                                     | -0.39 |

|     |               |                                                              |       |
|-----|---------------|--------------------------------------------------------------|-------|
| 731 | Mthfd11       | methylenetetrahydrofolate dehydrogenase (NADP+ dependent) 1- | -0.59 |
| 732 | Carns1        | carosine synthase 1                                          | -0.22 |
| 733 | Arl3          | ADP-ribosylation factor-like 3                               | -0.48 |
| 734 | Pygm          | muscle glycogen phosphorylase                                | -0.25 |
| 735 | Clasp2        | CLIP associating protein 2                                   | -0.39 |
| 736 | 4930420K17Rik | RIKEN cDNA 4930420K17 gene                                   | -0.68 |
| 737 | Trpc4ap       | transient receptor potential cation channel, subfamily C, me | -0.47 |
| 738 | Ikzf4         | IKAROS family zinc finger 4                                  | -0.19 |
| 739 | Cnot6         | CCR4-NOT transcription complex, subunit 6                    | -0.54 |
| 740 | Cry11         | crystallin, lambda 1                                         | -0.38 |
| 741 | Fam116a       | family with sequence similarity 116, member A                | -0.54 |
| 742 | Chrn1         | cholinergic receptor, nicotinic, beta polypeptide 1 (muscle) | -0.23 |
| 743 | Frs2          | fibroblast growth factor receptor substrate 2                | -0.59 |
| 744 | E130308A19Rik | RIKEN cDNA E130308A19 gene                                   | -0.42 |
| 745 | Atrnl1        | attractin like 1                                             | -0.39 |
| 746 | Ung           | uracil DNA glycosylase                                       | -0.51 |
| 747 | Zfyve21       | zinc finger, FYVE domain containing 21                       | -0.44 |
| 748 | Aff1          | AF4/FMR2 family, member 1                                    | -0.51 |
| 749 | Luc7l2        | LUC7-like 2 (S. cerevisiae)                                  | -0.34 |
| 750 | Tusc3         | tumor suppressor candidate 3                                 | -0.51 |
| 751 | Snhg1         | small nucleolar RNA host gene (non-protein coding) 1         | -0.77 |
| 752 | Smarca2       | SWI/SNF related, matrix associated, actin dependent regulato | -0.52 |
| 753 | Gltscr1       | glioma tumor suppressor candidate region gene 1              | -0.33 |
| 754 | Msh3          | mutS homolog 3 (E. coli)                                     | -0.44 |
| 755 | A630033H20Rik | RIKEN cDNA A630033H20 gene                                   | -0.51 |
| 756 | Tmem164       | transmembrane protein 164                                    | -0.36 |
| 757 | A130010J15Rik | RIKEN cDNA A130010J15 gene                                   | -0.42 |
| 758 | Zfp53         | zinc finger protein 53                                       | -0.63 |
| 759 | Tecpr1        | tectonin beta-propeller repeat containing 1                  | -0.26 |
| 760 | Mir17hg       | MIR17 host gene 1 (non-protein coding)                       | -0.52 |
| 761 | Lims1         | LIM and senescent cell antigen-like domains 1                | -0.57 |
| 762 | 2410042D21Rik | RIKEN cDNA 2410042D21 gene                                   | -0.61 |
| 763 | Arhgap5       | Rho GTPase activating protein 5                              | -0.3  |
| 764 | Rnf103        | ring finger protein 103                                      | -0.43 |
| 765 | Rpl41         | ribosomal protein L41                                        | -0.51 |
| 766 | Syde2         | synapse defective 1, Rho GTPase, homolog 2 (C. elegans)      | -0.4  |
| 767 | Rrad          | Ras-related associated with diabetes                         | -0.51 |
| 768 | Thrap3        | thyroid hormone receptor associated protein 3                | -0.46 |
| 769 | Cry1          | cryptochrome 1 (photolyase-like)                             | -0.42 |
| 770 | Mrrf          | mitochondrial ribosome recycling factor                      | -0.63 |
| 771 | Ccdc117       | coiled-coil domain containing 117                            | -0.38 |
| 772 | Nfkb1a        | nuclear factor of kappa light polypeptide gene enhancer in B | 0.04  |
| 773 | Emp3          | epithelial membrane protein 3                                | -0.39 |
| 774 | Phyh1         | phytanoyl-CoA dioxygenase domain containing 1                | -0.29 |
| 775 | Ttrap         | transformation/transcription domain-associated protein       | -0.42 |
| 776 | Enc1          | ectodermal-neural cortex 1                                   | -0.54 |
